# Supplementary material for: LDL delivery of microbial small RNAs drives atherosclerosis through macrophage TLR8
Source: Research Square preprint supplement (doi:10.21203/rs.3.rs-134271/v1), 2021-01-07
Supplement: Supplementary file 1 [file 3d7fe375cb36834a92a294ed.xlsx]

## Sheet: Supp. Table 1
	Supplementary Table 1. Differentially expressed transcripts of THP-1 cells following treatment with nLDL identified by deSEQ2.
	Feature_gene_name	log2FoldChange (nLDL_VS_Ctr)	padj (nLDL_VS_Ctr)
	ABCC1	1.03873	7.47124e-35
	ABCG1	-1.04016	1.46261e-08
	ABTB2	1.54627	2.72592e-05
	AC006967.1	1.2308	0.00609055
	AC007362.1	1.93985	1.23686e-05
	AC010980.2	1.6226	0.0149855
	AC011294.3	1.23599	3.67382e-16
	AC068580.5	1.00465	0.0149855
	AC109826.1	-1.47148	0.00672965
	AC242842.2	1.30336	3.08825e-27
	ACKR3	1.66973	0.00138072
	ACP5	1.0859	0.000683029
	ADAMTS1	-1.13495	0.0105659
	ADAMTS4	-1.73251	0.0417918
	ADCY6	-1.05295	6.59487e-09
	ADCY8	1.31321	8.93606e-07
	ADORA1	-1.63969	0.0159078
	ADORA2A	3.11076	0.0126768
	ADORA2A-AS1	2.69678	0.0224479
	ADORA3	-1.15788	6.64683e-07
	ADRA2B	-1.53194	0.00484633
	ADRB2	-1.33031	0.00102128
	AL133458.1	1.04647	0.0200747
	ALDH2	1.15478	1.25836e-07
	ALDOC	1.03751	3.09687e-11
	AMIGO2	-1.42013	0.0453972
	AMOT	-1.50521	0.0473296
	ANGPTL4	2.41737	6.79322e-05
	ANK3	-1.59646	6.45341e-07
	ANKRD1	1.79218	8.57531e-09
	ANKRD37	1.2401	0.0478281
	ANO3	3.41658	6.88606e-12
	AP003733.1	2.06683	0.0430894
	AQP9	2.57967	7.38943e-07
	ARHGAP24	1.26701	9.2022e-08
	ARHGAP31	1.00282	2.66639e-16
	ARMC2	-1.1056	0.000873834
	ASIC1	-1.09151	2.18456e-05
	ATF3	1.13973	8.37209e-11
	ATF5	1.03737	3.00841e-38
	ATP10A	-1.02999	5.34913e-06
	ATP1B1	-1.22413	7.22923e-08
	BAALC	1.57199	0.00149261
	BAMBI	1.66863	0.00922256
	BCL3	1.36056	1.93206e-39
	BCL9L	1.05088	1.2959e-27
	BDKRB2	-1.14336	0.000721058
	BHLHE40	1.91418	5.29333e-42
	BHLHE41	1.34121	3.48059e-18
	BIRC3	2.36433	1.88502e-46
	BMP2	-1.12272	3.39571e-09
	BMP6	2.57023	2.04166e-08
	BMPER	1.18791	0.0165406
	C12orf79	1.74413	0.0376609
	C17orf96	1.70952	6.43217e-22
	C1orf226	1.38667	5.32595e-16
	C1orf228	-2.17969	0.00103864
	C1orf61	2.09524	0.0133837
	C1QTNF1	2.87262	1.51169e-15
	C20orf112	1.16399	1.00769e-15
	C22orf42	1.0862	0.000569959
	C8orf56	2.27167	0.00795707
	CA12	1.09664	0.00149005
	CACNA1E	1.61237	2.33691e-43
	CACNA1G	1.84088	5.9566e-21
	CACNB4	-1.24165	0.00977571
	CADM2	2.04307	7.31211e-10
	CAMK2B	-1.16857	0.0281596
	CCDC109B	-1.18254	0.000234592
	CCDC170	-1.27124	9.93723e-10
	CCDC27	-1.38124	0.0321414
	CCDC74B	-1.50264	0.025861
	CCL20	1.22421	8.73868e-11
	CCL22	1.98335	2.16286e-11
	CCL3	1.2035	0.00859367
	CCL3L1	1.79099	2.90359e-05
	CCL4	1.50627	1.97021e-44
	CCR7	3.00372	8.36313e-56
	CD274	2.08718	4.38434e-06
	CD40	1.00878	2.34526e-10
	CD48	1.65153	1.81519e-14
	CD80	1.91666	3.65048e-17
	CDC42EP2	2.2267	8.66764e-23
	CEBPB	1.33726	7.67822e-53
	CENPA	-1.02484	0.0174434
	CENPM	-1.12893	9.36801e-06
	CFH	1.11585	4.81236e-05
	CFLAR	1.24035	7.02878e-58
	CFP	1.33386	8.25244e-05
	CGN	1.13383	0.00845965
	CH25H	-1.78976	0.00210135
	CHPF	1.06438	2.57954e-07
	CKB	1.27121	1.20231e-37
	CLCF1	2.2063	0.0109806
	CLEC17A	2.85621	3.13651e-06
	CLEC4E	2.88516	1.15738e-09
	CLIC5	-1.08604	0.0397908
	COL1A1	1.707	2.73318e-09
	COL24A1	1.04571	0.000308799
	COL4A2	1.50641	7.61163e-14
	COL4A4	-1.00659	0.0203879
	COL5A3	1.07793	0.0191676
	COL6A3	1.34482	0.00761261
	COL7A1	1.04778	2.53784e-27
	COL8A1	1.23603	0.0241927
	CPT1A	1.05446	3.91918e-18
	CRIM1	1.63477	2.30776e-19
	CRYBB1	-1.26015	1.59134e-06
	CSGALNACT1	1.54439	0.0443711
	CSPG4	-1.3571	2.28063e-18
	CTA-331P3.1	-1.33325	0.00419981
	CTD-2527I21.14	2.156	0.0120013
	CUX2	-1.25687	0.00250033
	CX3CR1	-1.54859	8.76737e-30
	CXCL1	2.23165	4.02852e-103
	CXCL13	1.53134	0.0393738
	CXCL2	2.36216	1.25784e-32
	CXCL3	2.63228	1.00025e-47
	CXCL5	2.16963	3.08776e-05
	CXCL6	2.06524	5.8497e-19
	CXCR2	-1.17306	0.00893901
	CXCR4	1.19192	6.91355e-24
	CXorf64	2.7452	2.09013e-11
	CYP27B1	2.34457	7.75408e-44
	DCLK2	-1.00064	0.0205314
	DCN	2.23631	0.0101048
	DDIT4	1.14251	5.5322e-17
	DDIT4L	-1.29833	6.77508e-23
	DGKA	1.06614	1.34519e-06
	DLL1	2.16135	7.49e-18
	DLL4	1.09597	3.93138e-33
	DNAJC5B	1.2674	0.000153368
	DPF3	-1.25652	0.000330285
	DPY19L2P1	-1.06862	0.0159356
	DTX4	1.13178	8.04368e-30
	DUSP1	2.10564	6.86113e-35
	DUSP2	1.02816	4.75296e-05
	DUSP5	1.80936	2.45502e-14
	EBF1	1.50876	1.76659e-17
	EBI3	1.51473	4.37847e-50
	EFNA5	2.05594	9.99728e-32
	EHD1	1.04266	5.75284e-31
	EMR3	2.53741	1.73952e-15
	ERCC6L	-1.07267	0.00259961
	EREG	2.05013	1.70135e-09
	ETV3	1.26101	5.69127e-55
	ETV3L	1.80084	5.50557e-38
	EVA1A	2.09034	0.00484813
	F13A1	-1.30669	0.0438847
	F3	1.31291	2.91006e-06
	FAIM3	-1.50675	6.26898e-07
	FAM117A	1.06746	0.00164204
	FAM167A	1.78452	0.0124827
	FAM177B	1.87468	9.49744e-08
	FAM184A	-1.03716	0.0187593
	FAM212A	-1.06795	0.0366571
	FAM65B	1.89799	3.941e-12
	FAM81A	-1.43341	9.10365e-10
	FAM84B	-1.14591	0.000264947
	FBP1	-2.69565	0.0372451
	FCGBP	-1.39813	1.05395e-09
	FFAR2	-1.34429	0.0197431
	FHDC1	1.9283	1.86977e-06
	FMN1	1.2274	4.69206e-08
	FOSL2	1.49727	3.75639e-64
	FRK	1.52682	8.73868e-11
	FSD1L	1.04624	1.99294e-05
	FTH1	1.34326	6.44147e-09
	FTH1P10	1.61234	3.34338e-09
	FTH1P11	1.27009	0.0292103
	FTH1P2	1.19984	0.00324396
	FTH1P20	1.44577	0.000680991
	FTH1P7	1.45914	0.0377841
	G6PD	1.23435	3.46002e-17
	GABRG1	2.36453	0.00416049
	GDPD1	-1.23464	0.030048
	GFPT2	2.68032	2.96487e-65
	GIPR	1.81484	0.0242356
	GJA1	2.24843	1.85198e-11
	GJA3	1.71253	2.16107e-20
	GJB2	1.89341	4.3129e-24
	GLUL	1.00548	1.62997e-42
	GPR116	2.49214	0.000935173
	GPR132	1.11389	1.00875e-20
	GPR157	1.44681	5.2172e-11
	GPR18	-1.12906	0.00153652
	GPR34	-1.27483	0.0499918
	GPR82	-1.44786	4.83196e-18
	GPR88	1.36874	0.000501873
	GPRC5C	1.82039	4.51375e-05
	GPX3	1.95156	5.58712e-05
	GRAMD1A	1.75412	6.80956e-74
	GRASP	4.76254	0.000722749
	GUSBP4	2.9682	0.0255936
	HAVCR2	-1.05243	1.71527e-25
	HCK	1.01656	1.73219e-40
	HES1	1.10246	0.00415841
	HES4	1.95705	0.00035101
	HGD	1.77266	0.00035003
	HILPDA	1.56212	2.61403e-25
	HIVEP1	1.01747	1.15234e-13
	HIVEP2	1.5809	2.25891e-21
	HK3	-1.00203	0.00156412
	HMGCS1	1.25826	1.82644e-36
	HMGN2P46	2.38606	0.00287273
	HS3ST3B1	1.75102	6.79383e-30
	HVCN1	-1.2473	7.24573e-09
	ICAM5	1.05747	3.13457e-06
	IDO1	3.10535	9.35724e-25
	IDO2	2.75455	0.0163609
	IFI30	1.67506	7.08591e-06
	IGDCC4	1.73542	1.62842e-05
	IGFN1	1.41562	0.0208861
	IGSF8	1.22924	1.92567e-32
	IGSF9	1.81253	0.00211999
	IL12B	2.75607	5.10389e-06
	IL15RA	1.12915	0.000243579
	IL1B	1.67386	2.62768e-132
	IL1R1	1.70676	9.63881e-48
	IL1R2	1.90526	3.85345e-89
	IL23A	2.8044	6.86113e-35
	IL32	1.33416	1.85879e-16
	IL6	2.77518	9.40997e-06
	IL7R	1.72274	4.08953e-27
	IL8	2.38973	7.14912e-126
	INA	-1.2081	1.89343e-08
	IRAK2	1.66926	3.05012e-31
	IRG1	3.50279	6.78647e-05
	ITGAM	-1.05892	4.7285e-28
	ITGB8	2.19692	5.11127e-43
	ITPR3	1.39192	1.04806e-14
	JAG1	-1.02068	6.64815e-07
	KCNQ1	-1.59151	1.41365e-12
	KDM6B	1.07767	7.48382e-14
	KIAA1239	3.01652	0.00371837
	KIAA1644	1.30753	0.0275912
	KIF26B	-1.49765	0.0314555
	KRT17P2	-1.25593	0.0453486
	KYNU	1.51573	9.12085e-78
	LAD1	3.35681	0.0231128
	LAG3	1.38332	1.8493e-06
	LAMB1	1.49272	1.96877e-05
	LAMP3	3.00233	5.41813e-73
	LAYN	3.53575	1.3119e-05
	LCNL1	1.41121	1.02963e-05
	LDLR	1.06641	4.81651e-12
	LEPREL1	1.01422	2.88405e-15
	LFNG	1.0196	7.34683e-06
	LGI2	-1.50657	8.25302e-32
	LGMN	1.32295	1.81881e-16
	LINC00937	2.24838	0.00558844
	LIPG	1.1942	0.000102504
	LOXL2	2.60048	5.61731e-07
	LPCAT1	1.72246	3.66336e-52
	LPL	-1.28249	2.67284e-32
	LRRC31	2.70913	0.0199231
	LRRC4	-1.15886	3.27279e-17
	LSP1	1.22685	7.77405e-09
	LSS	1.28886	1.18024e-35
	LZTS1	-1.21842	0.00173059
	LZTS3	1.05688	0.0444919
	MAFF	1.10212	8.11826e-17
	MAP1LC3A	1.44212	2.35862e-16
	MAP1LC3C	1.52681	4.8136e-13
	MAP2	-1.12042	0.000246056
	MAP3K8	1.37961	1.36942e-12
	MARCKS	1.05239	1.12984e-31
	MCOLN2	1.55511	1.53563e-23
	MED12L	-1.07175	0.004401
	MET	1.47189	9.11844e-43
	METTL1	1.17443	3.23764e-07
	METTL21B	1.32318	2.13306e-14
	METTL7B	-1.4058	0.0181114
	MIR22HG	1.02341	0.0116952
	MLNR	-1.37873	4.24967e-06
	MME	1.7651	5.86037e-05
	MMP12	1.80653	0.0102653
	MMP19	1.88453	4.42948e-47
	MMP25	1.43806	8.48485e-11
	MMRN2	-1.06174	0.000180511
	MREG	1.35149	0.0351809
	MRVI1	-1.42571	0.00215007
	MSC	1.61842	2.71441e-10
	MSR1	-1.20886	6.28981e-32
	MTUS1	-1.12745	2.72822e-17
	MXD1	1.61311	1.1167e-59
	MYBPH	-1.17956	4.61353e-19
	MYH11	1.59718	0.0193346
	MYO1G	1.4379	4.87636e-18
	NAMPT	1.2772	3.35183e-44
	NAPSB	-1.18613	0.0147636
	NAV3	1.3501	1.39568e-75
	NBPF4	1.4767	2.44991e-06
	NBPF6	1.38084	0.0369844
	NBPF9	1.59615	0.000257549
	NCCRP1	3.3888	2.3427e-18
	NCF1	1.48051	1.41553e-14
	NCF1	1.39789	1.39008e-13
	NCF1C	1.72467	0.0032634
	NCF1C	1.53192	0.039207
	NCF2	1.1924	2.58679e-31
	NES	-1.67841	8.05534e-26
	NFATC2	-1.05593	1.48011e-06
	NFKB2	1.13691	1.01884e-26
	NFKBIA	1.55765	2.42617e-69
	NMB	1.03966	0.00703025
	NOS1AP	1.41195	2.07414e-09
	NOTCH2NL	1.47113	1.44455e-08
	NOTCH3	2.23431	1.38603e-55
	NOXA1	-1.38412	0.0262635
	NPTX2	1.40304	0.000219562
	NR1H3	1.62857	1.44168e-72
	NR2F2	-1.14942	5.123e-23
	NR4A2	1.54838	0.0111453
	NR4A3	2.76023	3.26294e-17
	NRGN	-1.46557	1.05625e-26
	NRP2	1.52517	6.8001e-23
	NTN1	1.09933	0.00558032
	NTRK3	1.63942	1.44654e-05
	NTSR1	-1.07802	1.40454e-08
	NUPR1	1.0395	5.98863e-05
	NYNRIN	-1.00999	0.039852
	ORM1	2.02249	9.16137e-05
	OSMR	2.0667	0.0205779
	OTOF	1.51199	1.49198e-19
	PALD1	-1.63815	0.0415334
	PANX2	1.48333	1.80689e-05
	PCDH18	1.18215	0.01793
	PCDH20	1.06563	5.70186e-13
	PCDH9	1.02126	0.0249278
	PCED1B	-1.4617	0.000144993
	PCED1B-AS1	-1.08215	3.0886e-05
	PDE4B	1.33011	9.73715e-12
	PDE4DIP	1.99553	1.37575e-18
	PDE4DIP	1.63388	2.95903e-05
	PDGFA	-1.11232	3.1865e-34
	PDK4	2.09415	5.92402e-19
	PELI1	1.29621	2.67958e-23
	PHACTR1	1.00329	0.0191487
	PHACTR3	-1.11735	2.21916e-05
	PHF1	1.25197	0.03793
	PIGR	-1.13951	1.00569e-07
	PILRA	1.41428	1.13629e-27
	PKDCC	-1.02137	1.80294e-08
	PLA2G15	-1.01054	1.59691e-16
	PLA2G7	1.94272	2.38256e-53
	PLD1	1.60823	1.05697e-18
	PLEKHG6	1.98987	0.0455976
	PLIN2	1.83459	4.89158e-83
	PLIN4	2.43122	0.0445973
	PLVAP	-1.41282	0.000282831
	PMEPA1	1.66296	0.00860637
	PMFBP1	-1.10976	0.0158499
	PNMA2	1.43267	0.000375908
	POPDC3	1.62064	5.96375e-10
	PRDM1	1.09207	8.24484e-34
	PRR5L	-1.29705	2.79742e-06
	PTAFR	2.19053	2.88725e-64
	PTCRA	-1.26475	4.72563e-05
	PTGIR	1.10225	4.01796e-12
	PTGS2	1.44169	1.11042e-16
	PTPRF	2.61078	5.13808e-26
	RAB27B	1.51824	0.00254526
	RALGPS2	1.2059	2.38987e-05
	RARRES1	1.65475	0.0294424
	RASAL1	2.12893	3.74396e-09
	RASGEF1C	-2.16433	0.0249278
	RASGRP1	1.94614	0.000333251
	RASL10A	1.60247	0.000228803
	RBM24	2.71698	0.0109126
	RCAN2	1.64224	0.0160592
	RGCC	-1.01451	5.70994e-05
	RNF144B	1.96892	8.96991e-51
	ROBO4	-1.30762	0.0374561
	RORB	1.72132	1.28047e-12
	RP11-1134I14.8	-1.6216	0.0478281
	RP11-150O12.6	-1.40375	0.00012466
	RP11-177F15.1	-1.52474	0.0350402
	RP11-17G12.3	1.59962	0.0498659
	RP11-203E8.1	1.75738	0.0126333
	RP11-212I21.2	1.50443	0.0260456
	RP11-215G15.5	1.11964	0.0133749
	RP11-284F21.10	-1.36698	5.69018e-07
	RP11-284F21.7	-1.34933	0.025777
	RP11-290F20.3	1.31067	0.00894448
	RP11-320G24.1	-1.53985	0.0114275
	RP11-366L20.2	-1.01023	0.0249278
	RP11-373D23.2	2.33608	0.00541877
	RP11-383H13.1	1.00589	4.94647e-12
	RP11-389C8.2	1.00033	6.78399e-07
	RP11-404O13.4	-1.5733	0.0286265
	RP11-404O13.5	-1.622	0.0283771
	RP11-424C20.2	-1.02558	0.00225408
	RP11-443P15.2	2.49215	0.000494463
	RP11-456O19.4	2.11014	0.0441916
	RP11-458F8.4	1.04868	0.0155174
	RP11-519G16.3	2.12832	0.000330285
	RP11-567M16.1	-1.07607	0.00760505
	RP11-59D5__B.2	-1.08457	0.00416373
	RP11-624C23.1	1.2634	0.000180812
	RP11-662I13.2	1.65967	3.27616e-05
	RP11-81H14.2	1.99695	0.000873834
	RP11-883A18.3	-2.73777	0.000545953
	RP1-249H1.4	1.13499	0.0172493
	RP13-452N2.1	2.33937	4.60167e-09
	RRAD	1.54781	4.54535e-36
	S100A16	-1.27152	0.049829
	S1PR1	-1.67659	0.00035003
	SAT1	1.32856	1.16658e-42
	SCIMP	-1.25971	0.0178988
	SCIN	-1.06493	0.00117972
	SCN1B	2.6019	0.00331334
	SDS	1.81691	4.23418e-22
	SEMA3C	1.84221	1.12831e-17
	SEMA4C	1.26375	8.40529e-18
	SEMA6B	2.66433	7.38041e-05
	SEMA7A	-1.01093	1.38726e-18
	SERPINB7	2.33749	3.04239e-07
	SERPINE2	1.69294	3.04635e-17
	SGIP1	-1.04639	0.000386943
	SH3BP5	2.03941	2.41266e-15
	SHROOM3	2.35298	3.44319e-11
	SIGLEC11	-1.26628	0.000257723
	SIGLEC16	-1.00515	0.000398641
	SIK1	1.20392	3.33446e-07
	SIM1	1.54135	0.00564615
	SLAMF1	1.1111	0.0071675
	SLAMF7	1.84345	1.27433e-114
	SLAMF9	1.29248	2.0678e-06
	SLC16A10	1.36209	3.84575e-15
	SLC39A8	1.31924	9.31933e-64
	SLC43A2	2.59177	3.50371e-91
	SLC4A4	-1.00466	8.18055e-05
	SLC7A11	2.19366	1.67621e-95
	SLC7A11-AS1	2.7115	0.00827451
	SLC7A2	1.28827	2.04011e-05
	SLC7A8	-1.01389	1.74703e-31
	SNAI1	1.58757	9.80757e-13
	SNAPC1	1.03764	0.0137597
	SOCS3	2.23538	1.76083e-38
	SOD2	1.94699	5.77577e-154
	SORT1	-1.12295	1.92348e-32
	SPARCL1	-1.48063	0.0233405
	SPHK1	1.01733	8.37138e-09
	SPP1	-1.09842	5.55923e-49
	SPRY2	-1.29036	8.7361e-17
	SQSTM1	1.05472	9.72608e-06
	SRC	1.96182	1.18837e-52
	SSC5D	1.00345	0.000330285
	SSTR2	2.49011	0.00176312
	ST3GAL2	1.06554	2.25196e-15
	ST6GALNAC2	1.33255	0.0302631
	STAT4	1.13121	5.32448e-05
	STC1	1.14033	3.00981e-06
	STC2	1.08675	1.42134e-08
	STK17A	1.64015	5.79544e-33
	STON2	-1.0842	0.00905718
	SULT1C2	1.86198	0.0142456
	SYNPO	1.88489	2.87598e-10
	SYT4	2.709	0.00136001
	TBC1D29	-2.0946	0.0165231
	TBX15	1.47129	2.87833e-07
	TBX3	1.50486	0.000355024
	TDRD6	2.54569	1.07302e-25
	TFAP2C	1.29391	3.44752e-06
	TFPI	1.06137	2.77504e-06
	TFPI2	1.18979	3.54385e-12
	THSD7A	-1.12326	1.25789e-14
	TIMP3	1.01105	1.51943e-17
	TLR7	-1.46826	3.17341e-18
	TM6SF1	-1.53037	0.00396962
	TM7SF2	1.0717	1.99758e-06
	TMEM119	1.26372	3.25143e-48
	TNFAIP2	1.70282	5.31754e-66
	TNFAIP3	1.15552	3.67711e-70
	TNFAIP6	2.19587	1.7742e-90
	TNFAIP8L3	-1.45373	0.000217425
	TNFRSF9	1.3907	1.37977e-27
	TNIP1	1.23198	1.17746e-49
	TOX2	-1.39429	6.48265e-05
	TP53INP2	1.77621	6.4878e-59
	TPM1	-1.13202	1.55466e-06
	TRAC	-1.36969	3.4447e-10
	TRAF1	2.09868	1.31989e-91
	TRDN	-1.86866	0.00253852
	TREM2	-1.20088	3.00781e-48
	TREML3P	2.03975	0.0283665
	TRIM16	1.37678	0.0378661
	TRPM8	-1.20025	9.09652e-18
	TSHZ2	1.56375	6.98302e-13
	TSPAN10	1.0023	0.0366571
	TSPAN13	1.81457	1.27816e-08
	TTYH2	1.78296	3.59113e-09
	TVP23A	2.6871	0.00144039
	VANGL2	1.23815	0.0429551
	VCAM1	1.05023	0.000309341
	VCAN	1.58385	3.97838e-40
	VSIG2	-1.35346	0.0341427
	VSIG4	-1.14018	0.000528721
	WDR63	1.16413	0.038635
	WI2-1896O14.1	2.71205	3.01755e-06
	WIPF3	-1.26235	0.00168885
	WNT5A	3.25733	1.05625e-26
	WNT5A-AS1	2.26069	0.00398601
	ZFYVE16	1.04063	2.35056e-27
	ZSWIM5	1.59016	0.00328284

## Sheet: Supp. Table 2
	Supplementary Table 2. Significantly altered transcription factors based on nLDL-induced gene (mRNA)changes in macrophages.
	Rank	Network Object Name	Actual	n	R	N	Expected	Ratio	p-value	z-score
	1	RelA (p65 NF-kB subunit)	139	501	1930	40313	23.99	5.795	2.33e-66	24.22
	2	TAL1	264	501	9280	40313	115.3	2.289	1.489e-47	15.88
	3	c-Jun	82	501	924	40313	11.48	7.141	6.411e-45	21.18
	4	SP1	106	501	1830	40313	22.74	4.661	6.297e-41	17.98
	5	FOXP3	243	501	8810	40313	109.5	2.219	5.349e-40	14.52
	6	GCR	70	501	924	40313	11.48	6.096	6.531e-34	17.58
	7	HIF1A	68	501	892	40313	11.09	6.134	4.128e-33	17.39
	8	C/EBPbeta	63	501	774	40313	9.619	6.549	2.601e-32	17.49
	9	CREB1	169	501	5360	40313	66.61	2.537	4.562e-32	13.56
	10	SOX17	231	501	9228	40313	114.7	2.014	1.187e-30	12.45
	11	AML1 (RUNX1)	178	501	6062	40313	75.34	2.363	3.43e-30	12.91
	12	ESR1 (nuclear)	97	501	2135	40313	26.53	3.656	6.706e-29	14.15
	13	RelB (NF-kB subunit)	37	501	245	40313	3.045	12.15	8.008e-29	19.64
	14	LMO2	147	501	4570	40313	56.79	2.588	3.115e-28	12.79
	15	PU.1	55	501	677	40313	8.414	6.537	3.133e-28	16.3
	16	Oct-3/4	158	501	5177	40313	64.34	2.456	4.32e-28	12.59
	17	SOX2	140	501	4439	40313	55.17	2.538	6.771e-26	12.18
	18	TITF1	37	501	305	40313	3.79	9.761	2.42e-25	17.23
	19	TCF8	107	501	2848	40313	35.39	3.023	3.295e-25	12.56
	20	NF-kB1 (p50)	44	501	483	40313	6.003	7.33	9.425e-25	15.7
	21	c-Fos	42	501	440	40313	5.468	7.681	1.834e-24	15.81
	22	STAT3	69	501	1292	40313	16.06	4.297	2.082e-24	13.51
	23	SP3	45	501	559	40313	6.947	6.478	4.367e-23	14.63
	24	PPAR-gamma	37	501	356	40313	4.424	8.363	5.81e-23	15.65
	25	Bcl-6	40	501	442	40313	5.493	7.282	1.726e-22	14.9
	26	C/EBPalpha	42	501	548	40313	6.81	6.167	8.233e-21	13.66
	27	p53	75	C	1752	40313	21.77	3.445	8.931e-21	11.74
	28	c-Rel (NF-kB subunit)	29	501	230	40313	2.858	10.15	1.351e-20	15.6
	29	GATA-3	67	501	1476	40313	18.34	3.653	6.426e-20	11.65
	30	VDR	47	501	741	40313	9.209	5.104	8.59e-20	12.65
	31	NANOG	111	501	3614	40313	44.91	2.471	2.619e-19	10.4
	32	GATA-2	91	501	2722	40313	33.83	2.69	4.848e-18	10.24
	33	Androgen receptor	69	501	1715	40313	21.31	3.237	9.757e-18	10.62
	34	TCF7L2 (TCF4)	75	501	2004	40313	24.91	3.011	1.659e-17	10.36
	35	NF-kB2 (p52)	20	501	114	40313	1.417	14.12	1.735e-17	15.73
	36	RBP-J kappa (CBF1)	34	501	443	40313	5.505	6.176	4.399e-17	12.29
	37	IRF8	31	501	373	40313	4.636	6.687	1.199e-16	12.38
	38	NF-AT1(NFATC2)	22	501	183	40313	2.274	9.673	1.692e-15	13.19
	39	RUNX2	30	501	388	40313	4.822	6.222	2.634e-15	11.59
	40	ROR-alpha	20	501	147	40313	1.827	10.95	2.916e-15	13.55
	41	C/EBPdelta	23	501	213	40313	2.647	8.689	4.097e-15	12.62
	42	STAT1	35	501	552	40313	6.86	5.102	5.108e-15	10.89
	43	BMAL1	73	501	2139	40313	26.58	2.746	5.632e-15	9.309
	44	ATF-3	24	501	241	40313	2.995	8.013	6.44e-15	12.25
	45	SMAD3	28	501	359	40313	4.462	6.276	1.823e-14	11.26
	46	RXRA	28	501	360	40313	4.474	6.258	1.955e-14	11.24
	47	AP-2A	32	501	491	40313	6.102	5.244	3.654e-14	10.61
	48	ESR2 (nuclear)	34	501	565	40313	7.022	4.842	5.699e-14	10.32
	49	p63	38	501	726	40313	9.023	4.212	1.427e-13	9.796
	50	FKHR	33	501	550	40313	6.835	4.828	1.464e-13	10.14

## Sheet: Supp. Table 3
	Supplementary Table 3. Transcripts significantly altered by nLDL treatment within transcription factor networks identifeid by MetaCore.
	NF-kB Target Genes	Direction	C/EBPB Target Genes	Direction
	S100A16	DOWN	TNFAIP3	UP
	AMIGO2	DOWN	ABCC1	UP
	ADAMTS4	DOWN	ACKR3	UP
	CLIC5	DOWN	ADAMTS1	DOWN
	CXCL13	UP	ORM1	UP
	FBP1	DOWN	ALDH2	UP
	NBPF6	UP	ALDOC	UP
	KIF26B	DOWN	ATF3	UP
	BMPER	UP	ANK3	DOWN
	ADORA1	DOWN	BAMBI	UP
	C1orf61	UP	BDKRB2	DOWN
	ADORA2A	UP	PRDM1	UP
	FAM167A	UP	CEBPB	UP
	NR4A2	UP	CCDC170	DOWN
	RBM24	UP	NOS1AP	UP
	ADAMTS1	DOWN	SLC7A2	UP
	CCL3	UP	CCL20	UP
	NTN1	UP	CCL22	UP
	EVA1A	UP	CCL3L1	UP
	MED12L	DOWN	CCL3	UP
	HES1	UP	CLEC4E	UP
	TM6SF1	DOWN	F3	UP
	HMGN2P46	UP	COL1A1	UP
	HK3	DOWN	COL6A3	UP
	SCIN	DOWN	PTGS2	UP
	ADRB2	DOWN	CPT1A	UP
	BDKRB2	DOWN	CXCR4	UP
	VSIG4	DOWN	CYP27B1	UP
	S1PR1	DOWN	BHLHE40	UP
	VCAM1	UP	DCN	UP
	NBPF9	UP	EBF1	UP
	IL15RA	UP	EREG	UP
	TNFAIP8L3	DOWN	FOSL2	UP
	MMRN2	DOWN	GPR132	UP
	LIPG	UP	GFPT2	UP
	ORM1	UP	CXCL2	UP
	SEMA6B	UP	CXCL3	UP
	IRG1	UP	HES1	UP
	NUPR1	UP	MET	UP
	MMP12;MME	UP	IDO1	UP
	RGCC	DOWN	IDO2	UP
	STAT4	UP	IL1B	UP
	CXCL5	UP	IL12B	UP
	CXCL6;CXCL5	UP	IL6	UP
	CCL3L1	UP	IL8	UP
	ASIC1	DOWN	IL23A	UP
	SLC7A2	UP	KDM6B	UP
	SQSTM1	UP	KIF26B	DOWN
	IL6	UP	LDLR	UP
	LFNG	UP	LPL	DOWN
	ATP10A	DOWN	LSS	UP
	IL12B	UP	NR1H3	UP
	CD274	UP	LGMN	UP
	STC1	UP	MXD1	UP
	F3	UP	CCL4	UP
	PRR5L	DOWN	DUSP1	UP
	NBPF4	UP	MSR1	DOWN
	TPM1	DOWN	NFATC2	DOWN
	AQP9	UP	NRP2	UP
	ADORA3	DOWN	OSMR	UP
	JAG1	DOWN	SPP1	DOWN
	ANK3	DOWN	NAMPT	UP
	TBX15	UP	PDK4	UP
	ALDH2	UP	PLD1	UP
	PIGR	DOWN	PMEPA1	UP
	ARHGAP24	UP	NUPR1	UP
	FMN1	UP	DDIT4	UP
	NOTCH2NL	UP	SH3BP5	UP
	STC2	UP	SAT1	UP
	ANKRD1	UP	SLC43A2	UP
	FTH1	UP	SOCS3	UP
	BMP2	DOWN	SOD2	UP
	COL1A1	UP	SPHK1	UP
	NOS1AP	UP	SEMA4C	UP
	CLEC4E	UP	SQSTM1	UP
	TRAC	DOWN	STC2	UP
	MSC	UP	MAP3K8	UP
	CD40	UP	TNFAIP6	UP
	CCL20	UP
	ATF3	UP
	CCL22	UP
	GJA1	UP
	LDLR	UP
	TFPI2	UP
	MAP3K8	UP
	SNAI1	UP
	NCF1	UP
	KDM6B	UP
	DUSP5	UP
	CD48	UP
	ITPR3	UP
	SLC16A10	UP
	ARHGAP31	UP
	IL32	UP
	PTGS2	UP
	MAFF	UP
	DDIT4	UP
	CD80	UP
	NR4A3	UP
	SERPINE2	UP
	TLR7	DOWN
	PLD1	UP
	PDK4	UP
	GPR132	UP
	NRP2	UP
	CXCR4	UP
	WNT5A	UP
	NFKB2	UP
	IL7R	UP
	COL7A1	UP
	TNFRSF9	UP
	PILRA	UP
	EHD1	UP
	IRAK2	UP
	EFNA5	UP
	LPL	DOWN
	CXCL3;CXCL2	UP
	DLL4	UP
	PRDM1	UP
	PDGFA	DOWN
	ABCC1	UP
	IL23A	UP
	DUSP1	UP
	RRAD	UP
	ATF5	UP
	SOCS3	UP
	BCL3	UP
	BHLHE40	UP
	SAT1	UP
	MET	UP
	CYP27B1	UP
	NAMPT	UP
	CCL4	UP
	BIRC3	UP
	IL1R1	UP
	SPP1	DOWN
	TNIP1	UP
	EBI3	UP
	RNF144B	UP
	CEBPB	UP
	ETV3	UP
	NOTCH3	UP
	CCR7	UP
	CFLAR	UP
	SLC39A8	UP
	FOSL2	UP
	PTAFR	UP
	TNFAIP2	UP
	NFKBIA	UP
	TNFAIP3	UP
	LAMP3	UP
	NAV3	UP
	PLIN2	UP
	TRAF1	UP
	SLC7A11	UP
	CXCL1	UP
	CXCL1;CXCL2	UP
	SLAMF7	UP
	IL8	UP
	IL1B	UP
	SOD2	UP

## Sheet: Supp. Table 4
	Supplementary Table 4. Oligonucleotide sequences used in this study
	Identity	Manufacturer	Sequence
	nt-LNA A PS	Qiagen	5'- +T*+A*+A*+C+A*+C*+G*+T*+C*+T*+A*+T*+A*+C*+G*+C*+C*+C*+A -3'
	nt-LNA B PS	Qiagen	5'- +G*+C*+T*+C*+C*+C*+T*+T*+C*+A*+A*+T*+C*+C*+A*+A -3'
	nt-LNA A PO	Qiagen	5'- +A+C+G+T+C+T+A+T+A+C+G+C+C+C+A -3'
	nt-LNA B PO	Qiagen	5'- +G+C+T+C+C+C+T+T+C+A+A+T+C+C+A+A -3'
	ORN06	IDT	5'- rU*rU*rG*rU*rU*rG*rU*rU*rG*rU*rU*rG*rU*rU*rG*rU*rU*rG*rU*rU -3'
	ssRNA40	IDT	5'-rG*rC*rC*rC*rG*rU*rC*rU*rG*rU*rU*rG*rU*rG*rU*rG*rA*rC*rU*rC -3'
	r denotes ribodeoxynucleotide base
	+ denotes LNA base
	* denotes phosphorothioate linkage

## Sheet: Supp. Table 5
	Supplementary Table 5. Comprehensive gene enrichment analysis of quality cells isolated from the atherosclerotic lesion.
	gene	p_val	avg_logFC	pct.1	pct.2	p_val_adj	cluster
	C1qa	0	2.55387	0.708	0.079	0	0
	C1qb	0	2.51807	0.735	0.108	0	0
	C1qc	0	2.20124	0.698	0.079	0	0
	Ms4a7	0	1.22348	0.469	0.046	0	0
	Lgmn	0	1.08716	0.726	0.19	0	0
	Mrc1	0	1.01529	0.523	0.043	0	0
	Fcrls	0	1.00915	0.435	0.017	0	0
	Csf1r	0	0.914258	0.646	0.126	0	0
	Mgl2	0	0.905225	0.383	0.034	0	0
	Dab2	0	0.744147	0.552	0.081	0	0
	Adgre1	0	0.684322	0.493	0.068	0	0
	C3ar1	0	0.565958	0.421	0.038	0	0
	Mt1	6.83287e-305	1.33676	0.728	0.2	1.11465e-300	0
	Mafb	7.84714e-303	0.878523	0.57	0.102	1.2801e-298	0
	Fcgr3	9.12685e-298	0.832868	0.642	0.141	1.48886e-293	0
	Pltp	8.09132e-295	1.0028	0.53	0.094	1.31994e-290	0
	Grn	6.70511e-283	0.857123	0.758	0.228	1.0938e-278	0
	Sdc3	5.31695e-277	0.627093	0.542	0.103	8.67355e-273	0
	Slamf9	5.90163e-277	0.621253	0.475	0.074	9.62733e-273	0
	Cd63	1.99506e-274	0.796101	0.543	0.099	3.25454e-270	0
	Ctsb	1.6059e-268	1.1105	0.93	0.51	2.6197e-264	0
	Pid1	4.2578e-266	0.657172	0.552	0.111	6.94574e-262	0
	Pf4	5.18261e-266	1.26435	0.368	0.041	8.45439e-262	0
	Selenop	4.02956e-265	1.12646	0.663	0.195	6.57342e-261	0
	Trem2	8.32904e-263	0.666583	0.385	0.047	1.35872e-258	0
	Stab1	1.2948e-262	0.627008	0.35	0.037	2.11221e-258	0
	Lyz2	1.2043e-261	1.06306	0.931	0.532	1.96457e-257	0
	Ccl9	1.75154e-256	1.00855	0.578	0.129	2.85729e-252	0
	Cxcl16	6.87456e-256	0.675449	0.496	0.089	1.12145e-251	0
	Lpl	6.42323e-255	0.966005	0.321	0.03	1.04782e-250	0
	Tgfbi	2.74392e-252	0.704726	0.649	0.156	4.47616e-248	0
	Adam15	3.0106e-251	0.405921	0.393	0.052	4.91119e-247	0
	Ccl2	2.55388e-248	0.964929	0.462	0.077	4.16614e-244	0
	App	1.53348e-242	0.603397	0.588	0.139	2.50157e-238	0
	Itgb5	3.96271e-240	0.484038	0.38	0.051	6.46437e-236	0
	Ecm1	3.20055e-234	0.682002	0.379	0.053	5.22105e-230	0
	Cst3	1.81766e-233	0.636889	0.993	0.805	2.96515e-229	0
	Cd14	4.32231e-233	0.874407	0.628	0.159	7.05098e-229	0
	Timp2	1.61985e-231	0.660967	0.584	0.151	2.64247e-227	0
	Lrp1	1.11614e-230	0.584886	0.537	0.115	1.82075e-226	0
	Hexa	2.81876e-222	0.682656	0.73	0.258	4.59825e-218	0
	Trf	8.05733e-218	0.652042	0.484	0.103	1.31439e-213	0
	Ckb	3.35979e-214	0.592783	0.531	0.12	5.48083e-210	0
	Psap	1.61752e-213	0.903886	0.98	0.764	2.63865e-209	0
	P2ry6	5.05084e-205	0.424878	0.369	0.059	8.23943e-201	0
	Rnase4	1.91446e-204	0.351028	0.275	0.028	3.12306e-200	0
	Mpeg1	1.49623e-201	0.62175	0.663	0.191	2.4408e-197	0
	Tnip3	4.43637e-201	0.851753	0.394	0.07	7.23706e-197	0
	Abca9	1.38392e-199	0.260968	0.254	0.023	2.25758e-195	0
	Anxa5	1.07091e-197	0.727655	0.731	0.295	1.74698e-193	0
	Ctsc	4.71819e-195	0.89983	0.833	0.473	7.69678e-191	0
	Tbxas1	4.84371e-194	0.288172	0.278	0.031	7.90155e-190	0
	Tmem176b	8.08492e-193	0.771846	0.655	0.214	1.31889e-188	0
	Rab7b	1.64076e-191	0.346319	0.369	0.06	2.67657e-187	0
	Ctss	1.65654e-190	0.921199	0.959	0.729	2.70232e-186	0
	Axl	6.62681e-187	0.387787	0.318	0.045	1.08103e-182	0
	Gpx1	2.62266e-186	0.758223	0.963	0.77	4.27835e-182	0
	Cd68	1.88007e-182	0.555745	0.586	0.17	3.06696e-178	0
	Zfhx3	3.47051e-181	0.39955	0.358	0.063	5.66144e-177	0
	Clec4b1	3.86254e-181	0.474507	0.278	0.035	6.30096e-177	0
	Myof	1.42419e-180	0.349981	0.351	0.059	2.32327e-176	0
	Camk1	5.63818e-179	0.365058	0.335	0.055	9.19756e-175	0
	Sirpa	3.176e-178	0.520917	0.564	0.162	5.18101e-174	0
	Gatm	6.30645e-178	0.364699	0.27	0.033	1.02877e-173	0
	Clec4a2	2.261e-174	0.398409	0.382	0.074	3.68838e-170	0
	Lifr	3.25829e-173	0.352867	0.348	0.061	5.31525e-169	0
	Ccl6	3.71189e-172	0.994527	0.582	0.182	6.0552e-168	0
	Cd300c2	1.00071e-171	0.551118	0.578	0.17	1.63245e-167	0
	Rab3il1	2.55221e-169	0.275108	0.254	0.03	4.16343e-165	0
	Fn1	4.14477e-169	1.18245	0.387	0.081	6.76137e-165	0
	Cx3cr1	3.47491e-168	0.566713	0.389	0.083	5.66862e-164	0
	Aif1	2.70846e-163	0.500092	0.435	0.104	4.41831e-159	0
	Dhrs3	4.93559e-163	0.411894	0.487	0.131	8.05142e-159	0
	Clec4a3	9.92293e-162	0.397674	0.453	0.107	1.61873e-157	0
	Plxnb2	5.88016e-157	0.371412	0.399	0.091	9.59231e-153	0
	Fcer1g	4.78902e-153	0.623305	0.963	0.6	7.81233e-149	0
	Hexb	8.80061e-152	0.78934	0.579	0.221	1.43564e-147	0
	Alox5ap	9.48747e-149	0.471488	0.702	0.247	1.54769e-144	0
	Zeb2	1.94502e-148	0.65419	0.7	0.308	3.17291e-144	0
	Cfp	6.93971e-146	0.647614	0.498	0.153	1.13207e-141	0
	Gusb	7.49419e-145	0.477992	0.52	0.171	1.22253e-140	0
	Fcgr2b	9.02949e-145	0.614178	0.605	0.232	1.47298e-140	0
	Lamp1	1.02647e-144	0.547113	0.88	0.564	1.67448e-140	0
	Ms4a6d	1.11276e-144	0.376699	0.425	0.103	1.81525e-140	0
	Wfdc17	1.47132e-143	0.638428	0.621	0.225	2.40016e-139	0
	Ifi207	2.73769e-143	0.418615	0.443	0.119	4.46599e-139	0
	Tmem176a	6.3552e-143	0.602038	0.576	0.199	1.03672e-138	0
	Tmem106a	1.9789e-139	0.302378	0.349	0.077	3.22819e-135	0
	Lilr4b	1.68748e-138	0.492564	0.538	0.176	2.75278e-134	0
	Egr1	6.47998e-136	0.64876	0.55	0.2	1.05708e-131	0
	Ms4a6c	6.65757e-136	0.432308	0.609	0.207	1.08605e-131	0
	Lgals3	1.35715e-133	0.742142	0.81	0.452	2.21392e-129	0
	Hacd4	5.13396e-133	0.277626	0.309	0.061	8.37503e-129	0
	Clec4a1	7.2674e-133	0.344735	0.365	0.086	1.18553e-128	0
	Cfh	8.62106e-133	0.413745	0.265	0.046	1.40635e-128	0
	Ifitm3	1.33779e-130	0.361506	0.849	0.466	2.18233e-126	0
	Lair1	1.53557e-130	0.390878	0.377	0.096	2.50497e-126	0
	Npc2	1.97784e-130	0.494973	0.957	0.732	3.22646e-126	0
	Daglb	1.34632e-129	0.289896	0.31	0.065	2.19625e-125	0
	Ehd4	9.30797e-129	0.460764	0.522	0.192	1.51841e-124	0
	Cxcl2	2.53569e-128	0.612325	0.626	0.269	4.13647e-124	0
	Ftl1	7.68435e-128	0.789596	1	0.995	1.25355e-123	0
	Ctsh	9.4256e-127	0.527014	0.892	0.579	1.5376e-122	0
	Cd81	4.58517e-126	0.766933	0.71	0.394	7.47979e-122	0
	Metrnl	9.14344e-126	0.510525	0.559	0.207	1.49157e-121	0
	H2-DMb1	5.22602e-125	0.665923	0.603	0.259	8.5252e-121	0
	Rgs10	1.58381e-124	0.532896	0.574	0.235	2.58367e-120	0
	Pla2g7	1.88606e-124	0.334974	0.414	0.109	3.07672e-120	0
	Mcub	8.27551e-124	0.394699	0.403	0.114	1.34998e-119	0
	Plin2	3.96478e-123	0.47247	0.656	0.277	6.46774e-119	0
	Ctsa	8.9469e-122	0.478469	0.668	0.302	1.45951e-117	0
	Cd302	2.69681e-119	0.281294	0.313	0.071	4.3993e-115	0
	Fcgrt	3.166e-119	0.371474	0.356	0.093	5.1647e-115	0
	Ctsz	2.34879e-118	0.51745	0.929	0.687	3.83158e-114	0
	Cdkn1a	7.59135e-118	0.637446	0.577	0.229	1.23838e-113	0
	Anxa3	1.73784e-117	0.265574	0.318	0.072	2.83494e-113	0
	Maf	4.29472e-117	0.488946	0.38	0.109	7.00598e-113	0
	Acer3	8.00554e-117	0.327602	0.403	0.118	1.30594e-112	0
	S100a1	3.66189e-116	0.270771	0.293	0.064	5.97365e-112	0
	Vsir	4.18951e-115	0.43743	0.538	0.208	6.83434e-111	0
	Lacc1	2.59314e-114	0.270439	0.264	0.053	4.23019e-110	0
	Fcgr1	3.53002e-114	0.30301	0.329	0.079	5.75852e-110	0
	Marcks	6.21326e-114	0.554513	0.701	0.349	1.01357e-109	0
	Fth1	1.07597e-111	0.555837	1	0.999	1.75522e-107	0
	Lamp2	6.72694e-111	0.463763	0.645	0.305	1.09737e-106	0
	Basp1	3.24534e-110	0.317997	0.501	0.172	5.29413e-106	0
	Cebpa	3.82332e-110	0.267628	0.275	0.059	6.23698e-106	0
	Tlr2	5.02881e-110	0.38674	0.402	0.119	8.2035e-106	0
	Naaa	5.80891e-109	0.370102	0.412	0.131	9.47608e-105	0
	Csf2ra	7.27521e-109	0.442513	0.539	0.208	1.18681e-104	0
	Abhd12	4.01502e-106	0.335318	0.426	0.144	6.54971e-102	0
	Dstn	7.23531e-106	0.458265	0.434	0.146	1.1803e-101	0
	C5ar1	8.66074e-106	0.308843	0.338	0.088	1.41283e-101	0
	Pld4	8.67272e-106	0.427125	0.613	0.271	1.41478e-101	0
	Rbpj	8.9799e-106	0.450251	0.538	0.225	1.46489e-101	0
	Asah1	1.62799e-104	0.380153	0.491	0.185	2.65575e-100	0
	Nfkbiz	7.57365e-104	0.530906	0.6	0.27	1.23549e-99	0
	Lrrc25	3.55441e-102	0.288685	0.392	0.12	5.79831e-98	0
	Comt	1.92257e-100	0.331667	0.472	0.177	3.13628e-96	0
	Cybb	3.5765e-100	0.486973	0.811	0.499	5.83435e-96	0
	Cyfip1	8.29006e-100	0.378232	0.508	0.206	1.35236e-95	0
	F13a1	9.52746e-100	0.521395	0.365	0.112	1.55422e-95	0
	Tyrobp	1.13296e-98	0.325494	0.96	0.662	1.8482e-94	0
	Eps8	1.6336e-98	0.304381	0.306	0.081	2.6649e-94	0
	Itgam	1.17381e-96	0.417507	0.52	0.209	1.91484e-92	0
	Glul	7.57144e-96	0.41292	0.433	0.16	1.23513e-91	0
	Zfp36	2.52893e-93	0.479855	0.846	0.615	4.12545e-89	0
	Ifitm2	2.90885e-93	0.274312	0.734	0.378	4.74521e-89	0
	Phlda1	3.6323e-93	0.413002	0.393	0.135	5.92537e-89	0
	Ly86	9.69695e-93	0.461025	0.817	0.543	1.58186e-88	0
	Clec12a	4.19745e-92	0.345646	0.358	0.113	6.8473e-88	0
	Serpinb6a	5.6048e-92	0.37279	0.318	0.094	9.14312e-88	0
	Gas7	6.84034e-92	0.348383	0.358	0.117	1.11586e-87	0
	Fam129a	3.20797e-91	0.30891	0.403	0.139	5.23317e-87	0
	Creg1	1.40219e-89	0.377204	0.581	0.27	2.2874e-85	0
	Pea15a	4.31631e-88	0.262829	0.296	0.084	7.0412e-84	0
	BC028528	1.32022e-86	0.297636	0.43	0.162	2.15368e-82	0
	Gda	1.98289e-86	0.420994	0.371	0.124	3.23469e-82	0
	Gsn	1.51343e-84	0.618059	0.473	0.19	2.46886e-80	0
	Pirb	9.41657e-83	0.330781	0.501	0.207	1.53613e-78	0
	Rrbp1	2.45441e-82	0.422541	0.869	0.645	4.00388e-78	0
	Ccr5	6.26e-82	0.340655	0.437	0.166	1.02119e-77	0
	Ier3	6.88311e-82	0.293646	0.393	0.135	1.12284e-77	0
	Efhd2	3.05431e-80	0.352556	0.616	0.303	4.9825e-76	0
	Plekho1	5.49632e-80	0.336188	0.509	0.231	8.96614e-76	0
	Cndp2	6.8545e-80	0.268058	0.342	0.115	1.11817e-75	0
	Ptms	4.52142e-78	0.439476	0.745	0.485	7.37579e-74	0
	Rassf4	5.1115e-78	0.381889	0.508	0.231	8.3384e-74	0
	Slc15a3	8.71568e-78	0.292833	0.365	0.128	1.42179e-73	0
	Dusp1	1.19647e-77	0.457153	0.829	0.61	1.9518e-73	0
	Alcam	1.10283e-74	0.274864	0.383	0.143	1.79905e-70	0
	Man2b1	7.96593e-74	0.392529	0.647	0.363	1.29948e-69	0
	Itm2b	3.55674e-73	0.479857	0.99	0.964	5.80212e-69	0
	Colgalt1	9.51212e-73	0.322053	0.44	0.192	1.55171e-68	0
	Plxnd1	1.94477e-72	0.315825	0.418	0.169	3.1725e-68	0
	Dpysl2	2.254e-72	0.309478	0.441	0.192	3.67695e-68	0
	Spi1	5.71467e-72	0.274963	0.611	0.296	9.32234e-68	0
	Fam46a	8.74015e-72	0.339715	0.434	0.182	1.42578e-67	0
	Rtn4	7.60096e-71	0.392339	0.675	0.405	1.23995e-66	0
	Socs3	9.72648e-71	0.39872	0.463	0.208	1.58668e-66	0
	Laptm5	1.17484e-70	0.449218	0.968	0.862	1.91651e-66	0
	Kctd12	1.58624e-70	0.441438	0.587	0.327	2.58763e-66	0
	Olfm1	3.06018e-70	0.257916	0.281	0.087	4.99208e-66	0
	Lmna	5.65233e-70	0.473187	0.465	0.209	9.22065e-66	0
	Ccr2	1.17783e-69	0.573287	0.488	0.231	1.92139e-65	0
	Bcl2a1b	7.8183e-69	0.345037	0.536	0.261	1.2754e-64	0
	Cd72	1.93339e-67	0.577692	0.478	0.234	3.15394e-63	0
	Ctsd	8.65647e-67	0.529873	0.808	0.56	1.41213e-62	0
	H2-Ab1	1.65406e-66	0.64833	0.897	0.754	2.69827e-62	0
	Ap2a2	8.2702e-66	0.301364	0.461	0.216	1.34912e-61	0
	Sdcbp	1.67751e-65	0.330229	0.759	0.523	2.73653e-61	0
	Lgals3bp	1.67861e-65	0.263809	0.375	0.15	2.73832e-61	0
	Atox1	1.97735e-65	0.412979	0.855	0.684	3.22565e-61	0
	Dusp3	2.11741e-65	0.250515	0.359	0.14	3.45413e-61	0
	Fxyd5	5.33102e-64	0.353195	0.962	0.82	8.6965e-60	0
	Unc93b1	1.09996e-63	0.365336	0.818	0.586	1.79437e-59	0
	H2-Aa	1.72622e-63	0.641775	0.893	0.752	2.81599e-59	0
	Anxa1	7.00061e-63	0.317082	0.459	0.208	1.14201e-58	0
	H2-Eb1	3.09622e-62	0.70366	0.893	0.76	5.05086e-58	0
	Hsp90b1	5.72456e-62	0.373168	0.943	0.833	9.33847e-58	0
	Picalm	9.87175e-62	0.353198	0.64	0.38	1.61038e-57	0
	Dbi	2.57642e-58	0.416318	0.755	0.555	4.20292e-54	0
	Nrros	3.8667e-58	0.293909	0.496	0.255	6.30774e-54	0
	Sdc4	6.58937e-58	0.360929	0.436	0.206	1.07492e-53	0
	Nfe2l2	8.53681e-58	0.297254	0.512	0.263	1.39261e-53	0
	Lcp1	1.10558e-57	0.390947	0.893	0.738	1.80354e-53	0
	Lipa	1.1386e-57	0.272135	0.462	0.222	1.85739e-53	0
	Ctsl	2.13925e-57	0.585189	0.49	0.242	3.48976e-53	0
	Pmepa1	3.77654e-57	0.454402	0.316	0.129	6.16066e-53	0
	Fos	8.93211e-57	0.443167	0.914	0.781	1.4571e-52	0
	Itm2c	1.38526e-56	0.307857	0.516	0.269	2.25977e-52	0
	Atp6v0b	2.42741e-56	0.261223	0.903	0.715	3.95984e-52	0
	Akr1a1	9.91041e-56	0.341263	0.739	0.54	1.61669e-51	0
	Cstb	1.05241e-55	0.253506	0.56	0.325	1.7168e-51	0
	Il6ra	1.31444e-55	0.251671	0.363	0.156	2.14425e-51	0
	Tm6sf1	1.59193e-55	0.314884	0.623	0.365	2.59691e-51	0
	Prcp	2.75851e-55	0.291648	0.497	0.264	4.49996e-51	0
	Ucp2	1.23195e-54	0.344187	0.922	0.855	2.00968e-50	0
	Hk2	1.99691e-54	0.265835	0.295	0.112	3.25755e-50	0
	Ifi27l2a	3.80369e-53	0.434926	0.926	0.792	6.20496e-49	0
	Slc6a6	8.9264e-53	0.308188	0.558	0.317	1.45616e-48	0
	Vim	1.30275e-52	0.410744	0.963	0.853	2.12517e-48	0
	Sh3bgrl	1.44921e-52	0.294274	0.541	0.307	2.3641e-48	0
	Laptm4a	5.70405e-52	0.286314	0.576	0.338	9.30502e-48	0
	Cotl1	2.01841e-50	0.362009	0.792	0.617	3.29264e-46	0
	Sat1	8.31543e-50	0.322848	0.774	0.58	1.3565e-45	0
	Cltc	2.1824e-49	0.344302	0.599	0.393	3.56015e-45	0
	Rgs1	3.51793e-49	0.511465	0.495	0.268	5.7388e-45	0
	Gltp	5.97228e-49	0.276246	0.496	0.281	9.74258e-45	0
	Actb	7.33435e-49	0.275162	1	1	1.19645e-44	0
	Actg1	7.55922e-49	0.266089	0.996	0.993	1.23313e-44	0
	Sgk1	1.48531e-48	0.283054	0.345	0.151	2.42299e-44	0
	Gns	7.01591e-47	0.253984	0.488	0.266	1.14451e-42	0
	Calr	5.49928e-46	0.307281	0.885	0.723	8.97098e-42	0
	Itgb1	8.07522e-46	0.305532	0.753	0.547	1.31731e-41	0
	Clic4	1.22292e-45	0.27466	0.414	0.214	1.99494e-41	0
	Cd74	2.35701e-44	0.493754	0.948	0.824	3.84499e-40	0
	Prkcd	6.07426e-44	0.250085	0.531	0.31	9.90893e-40	0
	Tgfbr1	8.72956e-44	0.29362	0.345	0.165	1.42405e-39	0
	Prdx1	1.71471e-43	0.345975	0.881	0.766	2.79721e-39	0
	Sdf2l1	4.16065e-43	0.280971	0.426	0.227	6.78727e-39	0
	S100a4	8.10802e-43	0.32282	0.702	0.512	1.32266e-38	0
	Capza2	8.75308e-43	0.26141	0.817	0.668	1.42789e-38	0
	Tmsb4x	9.5996e-43	0.276169	1	0.999	1.56598e-38	0
	H2-DMa	1.65607e-42	0.388717	0.783	0.619	2.70154e-38	0
	Cyth4	3.52085e-42	0.260685	0.533	0.316	5.74356e-38	0
	BC005537	5.57831e-42	0.356024	0.696	0.514	9.0999e-38	0
	Zfand5	6.93663e-42	0.284785	0.576	0.366	1.13157e-37	0
	Irf2bp2	1.55519e-41	0.29561	0.627	0.408	2.53698e-37	0
	Gm2a	2.27871e-41	0.263477	0.7	0.495	3.71725e-37	0
	Cd44	3.76162e-41	0.291479	0.578	0.352	6.13633e-37	0
	Clta	3.80549e-41	0.276285	0.913	0.849	6.20789e-37	0
	Tppp3	7.34162e-41	0.390903	0.324	0.15	1.19764e-36	0
	Pdia6	3.03166e-40	0.278604	0.69	0.494	4.94554e-36	0
	Wnk1	3.87216e-39	0.289952	0.794	0.653	6.31665e-35	0
	Glud1	4.80014e-39	0.255254	0.567	0.368	7.83047e-35	0
	Atf3	7.01935e-37	0.31783	0.664	0.461	1.14507e-32	0
	Klf6	8.79186e-37	0.322499	0.85	0.722	1.43422e-32	0
	Capg	1.03926e-36	0.369303	0.592	0.401	1.69534e-32	0
	Cd9	4.25113e-34	0.323837	0.488	0.297	6.93488e-30	0
	Jun	3.51884e-33	0.369875	0.774	0.623	5.74028e-29	0
	Rhob	4.40496e-33	0.292327	0.393	0.225	7.18581e-29	0
	Flna	1.08537e-32	0.293639	0.6	0.408	1.77057e-28	0
	Glipr1	2.81833e-30	0.263128	0.332	0.181	4.59754e-26	0
	Blvrb	4.52207e-30	0.265462	0.374	0.222	7.37686e-26	0
	Hspa5	2.87109e-28	0.267879	0.921	0.826	4.68361e-24	0
	Ahnak	1.13876e-27	0.279933	0.807	0.654	1.85767e-23	0
	Klf4	2.52959e-27	0.253801	0.438	0.269	4.12652e-23	0
	Etv3	2.46539e-26	0.266637	0.376	0.227	4.02179e-22	0
	Crip1	1.86005e-20	0.30043	0.988	0.963	3.03429e-16	0
	Id3	1.79793e-08	0.258322	0.288	0.213	0.000293296	0
	Ighd	0	1.14186	0.919	0.223	0	1
	Fcmr	0	0.966091	0.892	0.248	0	1
	Rps27	0	0.931763	1	1	0	1
	Vpreb3	0	0.848958	0.608	0.087	0	1
	Fcer2a	0	0.743911	0.704	0.128	0	1
	Gm8369	1.2161e-307	0.91334	0.776	0.185	1.98383e-303	1
	Iglc3	1.03259e-305	0.906057	0.872	0.24	1.68447e-301	1
	Pax5	1.60795e-301	0.737832	0.766	0.176	2.62305e-297	1
	Ebf1	2.60581e-293	1.05495	0.99	0.456	4.25085e-289	1
	Fau	1.04278e-291	0.662836	1	1	1.70108e-287	1
	Rps21	2.49024e-277	0.676215	1	0.999	4.06234e-273	1
	Cd79a	2.65777e-271	1.1139	1	0.582	4.33562e-267	1
	Mef2c	6.34997e-268	0.999357	0.951	0.473	1.03587e-263	1
	Rps19	3.39849e-267	0.756882	1	0.996	5.54396e-263	1
	Rps15a	1.70863e-262	0.711144	1	0.995	2.78728e-258	1
	Rps20	8.88693e-258	0.741001	1	0.997	1.44972e-253	1
	Rpl18a	3.73118e-255	0.657586	1	0.999	6.08667e-251	1
	Chchd10	8.72437e-255	0.601515	0.544	0.096	1.42321e-250	1
	Rpl12	2.39541e-251	0.75408	1	0.975	3.90764e-247	1
	Rps24	7.84144e-251	0.716378	1	0.999	1.27917e-246	1
	Rps29	8.87174e-248	0.571292	1	1	1.44725e-243	1
	Ccr7	5.19009e-247	0.72024	0.783	0.212	8.4666e-243	1
	H2-Ob	3.08191e-245	0.75445	0.853	0.276	5.02752e-241	1
	Iglc2	1.61446e-243	0.924125	0.93	0.394	2.63367e-239	1
	Bank1	2.94212e-242	0.714903	0.868	0.267	4.79948e-238	1
	Rps16	3.27204e-242	0.605908	1	0.999	5.33768e-238	1
	Rpl35a	1.16147e-241	0.568846	1	0.999	1.89471e-237	1
	Rpl21	7.56764e-236	0.637749	1	0.995	1.23451e-231	1
	Rpl27a	1.84961e-233	0.592085	1	0.999	3.01727e-229	1
	Cd79b	7.19836e-229	0.880536	0.992	0.517	1.17427e-224	1
	Scd1	1.06022e-228	0.686861	0.805	0.243	1.72954e-224	1
	Rpl34	6.04138e-225	0.583194	1	0.998	9.8553e-221	1
	Rpl30	5.35105e-221	0.569024	1	0.999	8.72917e-217	1
	Rps13	8.51676e-219	0.577258	1	0.998	1.38934e-214	1
	Cr2	8.88768e-218	0.466114	0.471	0.077	1.44985e-213	1
	Rpl37a	6.68717e-217	0.589018	1	1	1.09088e-212	1
	Rpl17	1.25628e-212	0.604888	1	0.992	2.04936e-208	1
	Tnfrsf13c	1.7864e-212	0.550001	0.554	0.116	2.91415e-208	1
	H2-DMb2	1.34712e-211	0.68642	0.86	0.294	2.19756e-207	1
	Rps5	1.01528e-210	0.616172	1	0.993	1.65622e-206	1
	Rps7	1.94146e-210	0.607211	1	0.996	3.16711e-206	1
	Rps28	6.24811e-210	0.571253	1	0.996	1.01925e-205	1
	Rpl23	1.21615e-209	0.567946	1	0.999	1.98391e-205	1
	Rpl26	7.06844e-209	0.57284	1	0.989	1.15307e-204	1
	Rpl38	6.79368e-205	0.568875	1	0.998	1.10825e-200	1
	Rpl9	5.32424e-202	0.537813	1	0.999	8.68543e-198	1
	Cd55	1.54068e-201	0.665883	0.764	0.239	2.51332e-197	1
	Hvcn1	1.87021e-200	0.639665	0.697	0.208	3.05087e-196	1
	Rpl39	4.05936e-200	0.595009	1	0.997	6.62204e-196	1
	Gm31243	1.78698e-198	0.554621	0.704	0.197	2.91511e-194	1
	Rpl35	6.8373e-198	0.580688	1	0.99	1.11537e-193	1
	Rpl19	1.65066e-197	0.535759	1	0.998	2.69272e-193	1
	Rpl13	2.95851e-197	0.574865	1	0.999	4.82621e-193	1
	Ms4a1	7.24557e-197	0.773187	0.946	0.438	1.18197e-192	1
	Fcrl1	1.07959e-195	0.359384	0.433	0.071	1.76114e-191	1
	H2-Oa	6.81854e-192	0.598596	0.693	0.209	1.11231e-187	1
	Rpl8	3.08729e-191	0.511681	1	0.997	5.0363e-187	1
	Rps18	4.45558e-191	0.573939	1	0.993	7.26838e-187	1
	Rps10	8.7238e-190	0.515001	1	0.999	1.42311e-185	1
	Pold4	4.85563e-188	0.720133	0.787	0.308	7.92099e-184	1
	Igkc	8.74051e-187	0.610315	0.975	0.681	1.42584e-182	1
	Rpl37	9.7842e-186	0.522176	1	0.999	1.5961e-181	1
	Rpl36	8.48307e-183	0.534974	1	0.994	1.38384e-178	1
	Zfp318	1.16193e-178	0.511434	0.573	0.147	1.89545e-174	1
	Rps4x	2.49904e-176	0.525599	1	0.995	4.07668e-172	1
	H3f3a	9.95741e-175	0.559101	1	0.997	1.62435e-170	1
	Cd22	1.26002e-174	0.509581	0.629	0.173	2.05546e-170	1
	Fcrla	1.99676e-174	0.586436	0.707	0.225	3.25731e-170	1
	Rpl7	9.09145e-171	0.47992	1	0.995	1.48309e-166	1
	Rps3	3.42505e-170	0.48956	1	0.995	5.58728e-166	1
	Rps3a1	5.44636e-168	0.477827	1	0.998	8.88465e-164	1
	Ighm	2.10117e-166	0.470741	0.997	0.757	3.42764e-162	1
	Chst3	2.23577e-163	0.383291	0.42	0.082	3.64721e-159	1
	Rps8	4.94266e-163	0.477316	1	0.999	8.06297e-159	1
	Rplp2	1.23913e-161	0.433022	1	0.997	2.0214e-157	1
	Rpl6	1.28569e-161	0.471381	1	0.995	2.09734e-157	1
	Rps23	2.52432e-161	0.466888	1	0.997	4.11792e-157	1
	Rps26	7.41598e-161	0.488047	1	0.994	1.20977e-156	1
	Rpl22	1.10699e-160	0.495908	1	0.988	1.80582e-156	1
	Rpl36a	3.71608e-160	0.535303	1	0.981	6.06204e-156	1
	Rpl32	6.49093e-159	0.505249	1	0.995	1.05886e-154	1
	Rps12	9.50602e-159	0.498794	1	0.996	1.55072e-154	1
	Rpl27	7.92569e-157	0.458082	1	0.991	1.29292e-152	1
	Cd19	1.24091e-154	0.457406	0.644	0.197	2.02429e-150	1
	Pkig	2.096e-153	0.551414	0.787	0.312	3.41921e-149	1
	Rpl10a	5.16411e-152	0.497081	1	0.987	8.42421e-148	1
	Fchsd2	3.7412e-151	0.51927	0.641	0.208	6.10302e-147	1
	Ralgps2	2.47477e-150	0.589482	0.78	0.329	4.03709e-146	1
	Cd74	6.44886e-149	0.652307	1	0.822	1.052e-144	1
	Tpt1	5.70586e-147	0.428787	1	1	9.30796e-143	1
	Rps9	2.45094e-144	0.399915	1	0.999	3.99822e-140	1
	Pxk	8.34976e-144	0.46682	0.594	0.191	1.3621e-139	1
	Serp1	1.14795e-143	0.592713	0.928	0.709	1.87265e-139	1
	Rplp1	1.43608e-143	0.442458	1	0.999	2.34268e-139	1
	Rpsa	2.93877e-143	0.48285	1	0.997	4.79402e-139	1
	Cd37	2.53952e-141	0.58614	0.947	0.654	4.14272e-137	1
	Rps25	8.87482e-141	0.459532	1	0.978	1.44775e-136	1
	Ccr6	3.83922e-139	0.295839	0.316	0.052	6.26291e-135	1
	Pou2af1	1.2576e-136	0.458251	0.576	0.173	2.05153e-132	1
	Eef1a1	1.71815e-136	0.429552	1	0.999	2.80282e-132	1
	Rpl10	1.93853e-135	0.425953	1	0.998	3.16233e-131	1
	Bcl11a	4.05844e-132	0.447221	0.554	0.17	6.62054e-128	1
	Mzb1	1.19831e-131	0.340207	0.739	0.249	1.95481e-127	1
	Rps27rt	3.09632e-131	0.627546	0.808	0.463	5.05103e-127	1
	Cd72	3.98282e-129	0.43509	0.652	0.224	6.49717e-125	1
	Rpl5	1.79784e-127	0.445735	0.999	0.979	2.93282e-123	1
	Lmo2	1.09876e-126	0.452071	0.542	0.174	1.7924e-122	1
	Tmsb10	2.97676e-126	0.437133	1	0.962	4.85599e-122	1
	Rpl4	4.61019e-125	0.440294	0.996	0.962	7.5206e-121	1
	Rack1	4.2204e-124	0.405861	1	0.989	6.88474e-120	1
	Ptp4a3	2.72501e-123	0.523115	0.707	0.309	4.44531e-119	1
	Rasgrp3	2.28739e-122	0.273254	0.3	0.055	3.73142e-118	1
	Rpl11	3.04414e-121	0.387126	1	0.996	4.9659e-117	1
	H2-Ab1	3.76936e-121	0.377155	0.997	0.748	6.14896e-117	1
	Rpl3	4.41199e-121	0.43305	1	0.987	7.19729e-117	1
	H2-Aa	1.65364e-120	0.443208	0.992	0.746	2.69758e-116	1
	Ltb	5.00595e-120	0.563185	0.908	0.57	8.16621e-116	1
	Rpl41	2.26348e-119	0.37896	1	1	3.69242e-115	1
	H2-Eb1	2.38119e-119	0.388727	0.992	0.754	3.88444e-115	1
	Btla	7.82604e-119	0.345443	0.474	0.133	1.27666e-114	1
	Ciita	1.50695e-118	0.392255	0.616	0.212	2.45828e-114	1
	Pxdc1	3.36745e-118	0.29932	0.36	0.08	5.49331e-114	1
	Rpl18	1.97435e-117	0.370299	1	0.996	3.22076e-113	1
	Spib	2.60619e-114	0.427292	0.499	0.155	4.25147e-110	1
	Btg1	1.10083e-111	0.485005	0.997	0.918	1.79579e-107	1
	Blnk	2.67723e-111	0.399952	0.572	0.201	4.36737e-107	1
	Rpl29	6.19835e-111	0.412322	0.999	0.976	1.01114e-106	1
	Stk17b	1.16299e-108	0.528924	0.943	0.766	1.89718e-104	1
	Rps15	1.38367e-106	0.402904	0.99	0.974	2.25718e-102	1
	Rps6	1.01369e-104	0.40408	0.999	0.979	1.65363e-100	1
	Rps27a	3.64549e-104	0.345281	1	1	5.9469e-100	1
	Lrrk2	1.55495e-103	0.301037	0.374	0.096	2.53659e-99	1
	Bach2	5.87739e-103	0.353573	0.442	0.133	9.58779e-99	1
	Siglecg	9.7454e-103	0.35312	0.67	0.254	1.58977e-98	1
	Shisa5	3.65044e-101	0.443774	0.968	0.826	5.95497e-97	1
	Rps2	7.87884e-101	0.38627	1	0.996	1.28528e-96	1
	Ppdpf	1.03976e-99	0.458347	0.715	0.35	1.69617e-95	1
	Cd180	1.50673e-99	0.360797	0.453	0.143	2.45793e-95	1
	Cd83	1.30526e-97	0.457431	0.733	0.335	2.12927e-93	1
	Tmem243	1.48832e-97	0.399231	0.661	0.289	2.4279e-93	1
	Trim7	1.15446e-96	0.308433	0.434	0.131	1.88327e-92	1
	Snn	6.6368e-96	0.34564	0.456	0.148	1.08266e-91	1
	Rps14	2.35528e-95	0.337707	1	0.997	3.84217e-91	1
	Grap	2.88697e-95	0.367492	0.548	0.209	4.70952e-91	1
	Smim14	2.0125e-94	0.471764	0.782	0.461	3.28299e-90	1
	Rpl24	3.52199e-91	0.350499	1	0.993	5.74543e-87	1
	Rpl28	6.167e-91	0.329699	1	0.996	1.00602e-86	1
	Uba52	3.4952e-90	0.463129	1	0.983	5.70171e-86	1
	Ly6d	3.89651e-89	0.461326	0.975	0.723	6.35638e-85	1
	Serpinb1a	8.87381e-88	0.333085	0.551	0.208	1.44758e-83	1
	Dmxl1	1.26216e-87	0.401554	0.605	0.259	2.05896e-83	1
	Gga2	1.06934e-85	0.262724	0.359	0.104	1.74441e-81	1
	Smap2	1.1115e-85	0.477911	0.744	0.418	1.81319e-81	1
	Rpl14	3.40747e-85	0.350813	0.999	0.977	5.5586e-81	1
	S1pr1	1.07698e-84	0.394678	0.537	0.211	1.75688e-80	1
	Swap70	1.2202e-84	0.410071	0.616	0.275	1.99051e-80	1
	Rpl15	2.25299e-84	0.335855	1	0.992	3.67531e-80	1
	Arpc5l	3.7201e-84	0.446342	0.708	0.385	6.0686e-80	1
	Dennd5b	1.04996e-82	0.262527	0.37	0.109	1.7128e-78	1
	Klf2	8.01222e-82	0.522514	0.937	0.769	1.30703e-77	1
	Blk	6.95379e-81	0.256826	0.434	0.142	1.13437e-76	1
	Pou2f2	4.65928e-79	0.417748	0.798	0.467	7.60068e-75	1
	Snx2	5.86483e-78	0.372561	0.661	0.328	9.56729e-74	1
	Pgap1	5.5949e-77	0.289976	0.434	0.15	9.12697e-73	1
	Iglc1	1.09352e-76	0.449105	0.474	0.177	1.78385e-72	1
	Mast4	7.73736e-76	0.262206	0.389	0.127	1.2622e-71	1
	Bin1	4.03527e-75	0.336633	0.554	0.243	6.58274e-71	1
	Zfp36l1	2.38573e-74	0.416487	0.86	0.646	3.89183e-70	1
	Eif3f	4.66029e-74	0.346777	0.951	0.891	7.60232e-70	1
	Gm30211	8.40219e-74	0.333827	0.352	0.11	1.37065e-69	1
	Foxp1	1.53051e-73	0.399393	0.9	0.707	2.49673e-69	1
	Rpl13a	6.81272e-73	0.384779	0.907	0.824	1.11136e-68	1
	Hmgn1	2.90655e-72	0.364116	0.747	0.406	4.74146e-68	1
	B3gnt5	3.03363e-72	0.297851	0.531	0.218	4.94876e-68	1
	Rpl22l1	6.44276e-72	0.395156	0.958	0.905	1.05101e-67	1
	Blvrb	7.92676e-72	0.292381	0.513	0.213	1.29309e-67	1
	Rps11	1.05807e-71	0.298811	1	0.998	1.72603e-67	1
	Pfdn5	6.96156e-71	0.31976	0.974	0.937	1.13564e-66	1
	H2-DMa	1.59738e-70	0.294593	0.896	0.612	2.60581e-66	1
	Sh3bp5	1.70003e-69	0.287986	0.456	0.176	2.77326e-65	1
	Smad7	2.24544e-69	0.383695	0.605	0.29	3.66299e-65	1
	Gpr183	4.50809e-69	0.374526	0.62	0.296	7.35405e-65	1
	Ifi209	5.38673e-68	0.355312	0.573	0.27	8.78737e-64	1
	Cd69	7.71252e-67	0.376988	0.741	0.419	1.25814e-62	1
	Apobec3	8.39423e-67	0.390707	0.814	0.602	1.36935e-62	1
	Arhgdib	1.74976e-64	0.309418	0.967	0.934	2.85438e-60	1
	Sorl1	1.95428e-64	0.314635	0.647	0.319	3.18802e-60	1
	Dusp2	6.42805e-64	0.33907	0.659	0.331	1.04861e-59	1
	Syk	6.17263e-63	0.36887	0.718	0.397	1.00694e-58	1
	Rpl31	1.20434e-62	0.292957	0.968	0.936	1.96465e-58	1
	Rel	5.84942e-61	0.377112	0.768	0.474	9.54216e-57	1
	Rpl7a	2.83813e-60	0.285774	0.997	0.981	4.62984e-56	1
	Cd52	1.13221e-59	0.310438	1	0.922	1.84698e-55	1
	Snx5	7.18633e-59	0.35021	0.708	0.422	1.17231e-54	1
	2020-03-01	1.56089e-58	0.274326	0.469	0.201	2.54627e-54	1
	Add3	7.97538e-58	0.31723	0.531	0.256	1.30102e-53	1
	Man1a	1.5077e-56	0.293273	0.7	0.382	2.45951e-52	1
	Eef1g	2.38441e-56	0.316031	0.905	0.835	3.88969e-52	1
	Sell	7.11973e-56	0.325879	0.705	0.391	1.16144e-51	1
	Limd2	2.14174e-54	0.350627	0.847	0.686	3.49382e-50	1
	Ifi203	1.88134e-53	0.398721	0.764	0.554	3.06902e-49	1
	Fam43a	2.17991e-52	0.260781	0.384	0.154	3.55609e-48	1
	Ddx5	4.10977e-52	0.25589	0.996	0.996	6.70428e-48	1
	Lbh	3.53782e-51	0.295019	0.563	0.293	5.77124e-47	1
	Cd38	8.42469e-51	0.259021	0.43	0.187	1.37432e-46	1
	Stap1	9.87415e-51	0.321468	0.733	0.454	1.61077e-46	1
	Csnk1g3	1.04387e-50	0.258859	0.445	0.205	1.70286e-46	1
	Sipa1	3.1376e-50	0.278401	0.517	0.266	5.11837e-46	1
	Gm11808	8.21427e-50	0.346612	0.772	0.59	1.33999e-45	1
	Gimap6	1.75209e-47	0.295898	0.816	0.577	2.85818e-43	1
	Ly6a	5.42144e-47	0.264363	0.776	0.514	8.844e-43	1
	Tnfrsf13b	7.489e-47	0.259812	0.467	0.225	1.22168e-42	1
	Crlf3	2.87474e-45	0.310114	0.669	0.415	4.68956e-41	1
	Tsc22d3	2.52101e-44	0.369162	0.825	0.708	4.11252e-40	1
	Jund	3.3517e-44	0.378249	0.987	0.969	5.46762e-40	1
	Gimap1	1.63535e-42	0.280184	0.672	0.399	2.66775e-38	1
	Ptpn6	4.2636e-42	0.355588	0.718	0.522	6.95521e-38	1
	Csk	6.11379e-42	0.284274	0.631	0.394	9.97343e-38	1
	Plk2	7.85737e-42	0.300758	0.356	0.158	1.28177e-37	1
	9930111J21Rik2	9.69171e-42	0.294503	0.516	0.283	1.58101e-37	1
	Ifi27l2a	1.72281e-39	0.324994	0.911	0.798	2.81042e-35	1
	Ripor2	3.02185e-39	0.252075	0.495	0.263	4.92955e-35	1
	Mndal	6.59049e-35	0.28063	0.764	0.616	1.07511e-30	1
	Cxcr4	2.43137e-34	0.267335	0.784	0.616	3.9663e-30	1
	Sp100	7.66315e-34	0.285168	0.72	0.538	1.25009e-29	1
	Rasgrp2	9.13734e-33	0.280239	0.588	0.371	1.49057e-28	1
	Eif4a2	8.06113e-30	0.252405	0.725	0.555	1.31501e-25	1
	Cd79a	0	1.45133	1	0.586	0	2
	Ebf1	6.81726e-306	1.40181	0.98	0.461	1.1121e-301	2
	Ms4a1	1.0596e-278	1.26001	0.979	0.439	1.72853e-274	2
	Ighm	1.45715e-277	1.21723	1	0.759	2.37704e-273	2
	Cd79b	1.64375e-264	1.1802	0.998	0.52	2.68145e-260	2
	Cd74	2.54943e-250	1.13959	1	0.824	4.15889e-246	2
	Igkc	1.64428e-242	1.21988	0.995	0.681	2.68231e-238	2
	mt-Nd2	4.288e-242	0.903799	1	0.993	6.99501e-238	2
	Cd37	2.51666e-238	0.966519	1	0.651	4.10542e-234	2
	mt-Co3	1.51695e-230	0.814118	1	0.998	2.4746e-226	2
	mt-Atp6	7.06181e-229	0.793178	1	0.999	1.15199e-224	2
	mt-Co1	1.66033e-228	0.756084	1	0.999	2.7085e-224	2
	mt-Co2	1.22277e-222	0.752259	1	0.999	1.99471e-218	2
	mt-Nd4	1.47339e-212	0.782198	1	0.997	2.40355e-208	2
	mt-Cytb	4.18104e-210	0.762752	1	0.997	6.82053e-206	2
	Gm31243	1.73148e-200	0.882425	0.66	0.206	2.82456e-196	2
	Siglecg	6.3628e-198	0.931611	0.704	0.254	1.03796e-193	2
	mt-Nd1	1.28768e-193	0.730954	1	0.983	2.10059e-189	2
	H2-K1	3.31619e-192	0.763869	1	0.933	5.4097e-188	2
	mt-Nd5	2.87981e-175	0.786348	0.998	0.91	4.69783e-171	2
	H2-Ab1	3.78077e-172	0.781079	1	0.75	6.16757e-168	2
	Fcmr	7.87212e-169	0.965634	0.72	0.269	1.28418e-164	2
	Napsa	2.10386e-167	0.857779	0.988	0.622	3.43202e-163	2
	Ly6e	4.39006e-166	0.691932	1	0.937	7.16151e-162	2
	Shisa5	8.94464e-164	0.807978	0.995	0.824	1.45914e-159	2
	Malat1	2.53544e-163	0.510526	1	0.999	4.13606e-159	2
	Ly6d	1.8624e-160	0.91936	1	0.722	3.03813e-156	2
	H2-D1	1.73478e-155	0.621221	1	0.955	2.82994e-151	2
	H2-Aa	9.78361e-153	0.692214	1	0.747	1.596e-148	2
	H2-Eb1	6.21188e-151	0.648917	1	0.755	1.01334e-146	2
	Mef2c	3.26954e-148	0.813763	0.856	0.486	5.3336e-144	2
	Bank1	4.24225e-143	0.768844	0.698	0.288	6.92038e-139	2
	4930523C07Rik	3.6168e-137	0.776807	0.877	0.545	5.90009e-133	2
	Foxp1	1.37145e-134	0.678561	0.971	0.701	2.23725e-130	2
	Macf1	1.0719e-132	0.684032	0.97	0.686	1.74859e-128	2
	Ly6a	3.56343e-131	0.812663	0.941	0.5	5.81303e-127	2
	Cd55	1.5847e-130	0.791003	0.632	0.256	2.58512e-126	2
	H2-DMb2	9.05094e-130	0.698137	0.71	0.313	1.47648e-125	2
	H2-Ob	1.97652e-125	0.722925	0.669	0.298	3.22429e-121	2
	Cd22	1.18389e-124	0.649528	0.531	0.186	1.93127e-120	2
	Scd1	1.46025e-121	0.70712	0.627	0.265	2.38211e-117	2
	Xist	2.10639e-121	0.653661	0.998	0.951	3.43616e-117	2
	mt-Nd4l	3.14712e-115	0.595095	0.998	0.906	5.1339e-111	2
	Ighd	2.47113e-114	0.822724	0.626	0.256	4.03116e-110	2
	S1pr1	1.77556e-113	0.665322	0.55	0.212	2.89646e-109	2
	Pou2f2	1.0746e-111	0.718521	0.803	0.469	1.75299e-107	2
	Cd19	4.15791e-108	0.586045	0.537	0.211	6.78279e-104	2
	Ly86	6.15024e-106	0.582855	0.875	0.548	1.00329e-101	2
	Clk1	4.20459e-102	0.568452	0.98	0.774	6.85895e-98	2
	H2-Q7	5.64901e-101	0.544969	0.949	0.641	9.21524e-97	2
	Fcrla	1.34357e-99	0.607177	0.567	0.242	2.19177e-95	2
	Dennd4a	1.7558e-98	0.597311	0.902	0.608	2.86424e-94	2
	Serinc3	2.30576e-98	0.565851	1	0.863	3.76138e-94	2
	Unc93b1	3.71679e-95	0.528916	0.895	0.588	6.06319e-91	2
	H2-DMa	1.9364e-92	0.458898	0.953	0.609	3.15885e-88	2
	Mndal	6.05894e-90	0.575478	0.851	0.608	9.88396e-86	2
	Ltb	8.03913e-87	0.612234	0.866	0.577	1.31142e-82	2
	mt-Nd3	4.34675e-86	0.528395	0.997	0.876	7.09085e-82	2
	Man1a	3.78789e-85	0.679484	0.635	0.391	6.17918e-81	2
	H2-T23	1.71659e-84	0.50813	0.983	0.817	2.80027e-80	2
	Gimap6	2.10212e-84	0.534576	0.868	0.574	3.42918e-80	2
	Pgap1	5.06502e-83	0.60513	0.417	0.153	8.26256e-79	2
	Trim7	5.65097e-83	0.546989	0.392	0.137	9.21842e-79	2
	Luc7l2	3.1924e-80	0.498106	0.983	0.818	5.20776e-76	2
	Ccr7	2.00741e-74	0.581636	0.531	0.24	3.27469e-70	2
	Son	3.13001e-74	0.400605	0.998	0.946	5.10599e-70	2
	Rbm39	4.61089e-73	0.402839	1	0.971	7.52175e-69	2
	Arhgap15	6.64503e-73	0.641034	0.69	0.494	1.084e-68	2
	Ttc14	5.91584e-72	0.472133	0.809	0.595	9.65052e-68	2
	Cxcr4	6.27825e-70	0.547952	0.845	0.611	1.02417e-65	2
	Ralgps2	5.22355e-69	0.620718	0.589	0.35	8.52118e-65	2
	Rel	6.48196e-69	0.622902	0.702	0.483	1.0574e-64	2
	Cybb	8.03041e-69	0.314152	0.862	0.506	1.31e-64	2
	Inpp5d	3.07423e-68	0.565959	0.707	0.527	5.01499e-64	2
	Gm47283	1.46306e-66	0.41999	0.953	0.691	2.38669e-62	2
	Cd69	2.56042e-66	0.574651	0.677	0.428	4.17681e-62	2
	Apobec3	5.81375e-65	0.466568	0.814	0.604	9.48397e-61	2
	Gm30211	6.87156e-63	0.56586	0.325	0.114	1.12096e-58	2
	Tra2a	1.22077e-62	0.419196	0.947	0.737	1.99144e-58	2
	Mtdh	1.03676e-61	0.437766	0.94	0.715	1.69126e-57	2
	Adgre5	4.08732e-61	0.479842	0.857	0.599	6.66765e-57	2
	Fus	5.93875e-61	0.413059	0.947	0.757	9.68788e-57	2
	Atp2b1	6.19856e-59	0.451125	0.898	0.618	1.01117e-54	2
	Slc38a2	1.26819e-58	0.448802	0.934	0.7	2.06879e-54	2
	Btla	4.58182e-58	0.455376	0.358	0.147	7.47432e-54	2
	Fchsd2	3.23672e-57	0.568771	0.454	0.229	5.28006e-53	2
	Cxcr5	1.79566e-56	0.412797	0.328	0.126	2.92926e-52	2
	Gpr183	3.05525e-54	0.561517	0.534	0.307	4.98403e-50	2
	B3gnt5	1.09359e-53	0.49616	0.447	0.228	1.78398e-49	2
	B2m	4.33704e-53	0.303606	1	0.973	7.07501e-49	2
	Pnisr	5.01295e-53	0.357933	0.878	0.647	8.17762e-49	2
	Gm26740	5.20115e-53	0.501459	0.496	0.288	8.48463e-49	2
	Ccnl1	2.24638e-52	0.387121	0.929	0.708	3.66452e-48	2
	Cyba	8.30013e-52	0.346952	1	0.959	1.354e-47	2
	Arhgap30	1.31386e-50	0.385825	0.821	0.624	2.1433e-46	2
	Itga4	1.4763e-50	0.390482	0.811	0.583	2.40829e-46	2
	Fcer2a	1.70836e-50	0.579608	0.368	0.165	2.78684e-46	2
	Akap13	2.31158e-50	0.406594	0.958	0.793	3.77088e-46	2
	Ptprcap	1.29319e-49	0.38076	0.971	0.777	2.10958e-45	2
	Cd2	2.67435e-49	0.588824	0.576	0.368	4.36267e-45	2
	Rbm25	4.89704e-48	0.360003	0.943	0.751	7.98854e-44	2
	H2-Q6	1.43716e-47	0.459386	0.562	0.36	2.34444e-43	2
	Stk17b	1.49831e-47	0.411114	0.943	0.768	2.44419e-43	2
	Sell	5.04281e-47	0.509143	0.602	0.404	8.22634e-43	2
	mt-Atp8	1.14997e-46	0.411744	0.746	0.577	1.87595e-42	2
	Iqgap1	1.15208e-45	0.350954	0.992	0.869	1.87938e-41	2
	Hvcn1	4.18456e-45	0.500256	0.436	0.236	6.82628e-41	2
	Cd38	5.10248e-45	0.451322	0.385	0.193	8.32367e-41	2
	Pax5	6.46172e-45	0.420237	0.421	0.214	1.0541e-40	2
	Srrm2	2.00406e-44	0.347506	0.994	0.9	3.26922e-40	2
	Slc38a1	2.33473e-44	0.416895	0.734	0.571	3.80865e-40	2
	Gdi2	2.76835e-43	0.340193	0.905	0.746	4.516e-39	2
	Cd52	3.30189e-43	0.399296	0.998	0.922	5.38637e-39	2
	Srsf11	5.82125e-43	0.33709	0.875	0.685	9.49621e-39	2
	Stt3b	9.72404e-41	0.482949	0.469	0.296	1.58628e-36	2
	Camk2d	4.89917e-40	0.457914	0.502	0.335	7.99202e-36	2
	Cd53	1.18294e-39	0.294735	0.892	0.677	1.92974e-35	2
	Bclaf1	4.27545e-39	0.318727	0.862	0.673	6.97454e-35	2
	Zcchc7	7.10863e-39	0.43988	0.556	0.421	1.15963e-34	2
	Tra2b	9.28944e-39	0.341315	0.962	0.816	1.51539e-34	2
	Ahnak	3.08461e-37	0.468661	0.952	0.646	5.03193e-33	2
	Ankrd11	1.29735e-36	0.327148	0.904	0.728	2.11637e-32	2
	Ogt	1.48338e-36	0.315869	0.74	0.558	2.41984e-32	2
	Dad1	1.75704e-36	0.269451	0.958	0.809	2.86626e-32	2
	AC149090.1	2.40395e-36	0.584035	0.585	0.454	3.92156e-32	2
	Il2rg	2.72059e-36	0.406325	0.621	0.501	4.43811e-32	2
	Sorl1	3.12515e-36	0.415858	0.507	0.335	5.09805e-32	2
	H2-Q4	6.7368e-36	0.438827	0.583	0.459	1.09897e-31	2
	Srsf2	8.92022e-35	0.26771	0.91	0.717	1.45516e-30	2
	Arhgef1	1.40848e-34	0.334868	0.774	0.632	2.29766e-30	2
	Lmbrd1	2.9392e-34	0.407481	0.409	0.256	4.79471e-30	2
	Gm20696	7.63202e-34	0.359311	0.299	0.145	1.24501e-29	2
	Nktr	1.49e-33	0.326914	0.818	0.646	2.43064e-29	2
	Cd83	1.56711e-32	0.398414	0.535	0.357	2.55643e-28	2
	Cd47	5.17151e-32	0.288333	0.992	0.933	8.43629e-28	2
	Sec11c	7.559e-32	0.287558	0.883	0.703	1.2331e-27	2
	Gnl3	8.89692e-31	0.395989	0.463	0.314	1.45135e-26	2
	Dock2	1.71479e-30	0.348071	0.726	0.611	2.79734e-26	2
	Mzb1	1.72408e-30	0.479607	0.457	0.28	2.8125e-26	2
	Arhgap45	3.39566e-30	0.259896	0.901	0.713	5.53935e-26	2
	Mast4	5.95433e-30	0.337831	0.283	0.139	9.7133e-26	2
	Hsp90b1	1.80204e-29	0.259564	0.983	0.833	2.93966e-25	2
	Gm8369	1.82626e-29	0.323882	0.395	0.226	2.97919e-25	2
	P2rx4	2.05838e-29	0.412464	0.447	0.303	3.35783e-25	2
	Tcf4	4.25136e-28	0.411608	0.483	0.348	6.93524e-24	2
	Ero1lb	4.39131e-28	0.288332	0.31	0.165	7.16354e-24	2
	Syk	1.31008e-27	0.397113	0.535	0.417	2.13713e-23	2
	Bptf	1.41176e-27	0.30113	0.749	0.614	2.303e-23	2
	Stap1	2.53955e-27	0.432626	0.577	0.471	4.14277e-23	2
	Zcchc11	3.01572e-27	0.330448	0.681	0.569	4.91954e-23	2
	Sptbn1	1.1001e-26	0.420721	0.514	0.415	1.79459e-22	2
	Avl9	1.21876e-26	0.365135	0.459	0.326	1.98816e-22	2
	Serpinb1a	1.45025e-26	0.327468	0.379	0.227	2.3658e-22	2
	Ripor2	3.08936e-26	0.375505	0.406	0.273	5.03968e-22	2
	Hspa5	6.45551e-26	0.254458	0.973	0.825	1.05309e-21	2
	Fam43a	6.4725e-26	0.316145	0.304	0.164	1.05586e-21	2
	Txndc16	1.11313e-25	0.295241	0.31	0.171	1.81584e-21	2
	Malt1	1.50455e-25	0.419462	0.493	0.37	2.45438e-21	2
	Rnase6	2.19215e-25	0.267559	0.408	0.259	3.57605e-21	2
	Kmt2a	4.14405e-24	0.37888	0.52	0.424	6.76019e-20	2
	Ciita	1.20533e-23	0.363532	0.376	0.238	1.96626e-19	2
	Ifi203	1.62853e-23	0.325416	0.683	0.564	2.65662e-19	2
	H2-Oa	2.1976e-23	0.329951	0.38	0.243	3.58495e-19	2
	Sf3b3	3.90633e-23	0.378505	0.478	0.381	6.3724e-19	2
	Slc12a6	6.70918e-23	0.343097	0.412	0.292	1.09447e-18	2
	Bcl11a	1.18004e-22	0.333168	0.326	0.194	1.92499e-18	2
	Swap70	1.20149e-22	0.334077	0.421	0.296	1.95998e-18	2
	Prpf38b	1.83547e-22	0.274727	0.704	0.601	2.9942e-18	2
	Gm26917	3.87541e-22	0.321221	0.666	0.546	6.32196e-18	2
	Kmt2e	6.34734e-22	0.287211	0.686	0.593	1.03544e-17	2
	Etnk1	1.00428e-21	0.337386	0.519	0.415	1.63828e-17	2
	Arhgap17	1.25941e-21	0.337415	0.438	0.327	2.05448e-17	2
	Alkbh1	3.73299e-21	0.361453	0.426	0.318	6.08962e-17	2
	Mycbp2	8.35489e-21	0.321885	0.696	0.604	1.36293e-16	2
	Pml	1.12129e-20	0.262441	0.287	0.168	1.82916e-16	2
	Baz2b	2.56771e-20	0.357543	0.462	0.369	4.18871e-16	2
	Gm15987	4.23899e-20	0.276252	0.259	0.144	6.91506e-16	2
	Ddx6	8.74276e-20	0.256601	0.747	0.64	1.42621e-15	2
	Dmxl1	1.45506e-19	0.387046	0.388	0.282	2.37364e-15	2
	Cd86	2.72561e-19	0.316429	0.358	0.238	4.4463e-15	2
	Ccdc88c	5.82558e-19	0.302058	0.406	0.294	9.50327e-15	2
	Tspan32	1.55829e-18	0.285472	0.389	0.274	2.54204e-14	2
	Gpcpd1	2.55878e-18	0.330421	0.441	0.343	4.17414e-14	2
	Zfp318	3.51623e-18	0.325217	0.287	0.177	5.73602e-14	2
	Rsrc2	4.48515e-18	0.289882	0.674	0.607	7.31663e-14	2
	Helz2	1.49769e-17	0.31166	0.31	0.204	2.44318e-13	2
	Ddx50	1.2381e-16	0.335554	0.499	0.442	2.01971e-12	2
	Smad7	1.28908e-16	0.368647	0.411	0.311	2.10288e-12	2
	Ctso	2.30874e-16	0.272967	0.311	0.207	3.76625e-12	2
	2020-03-01	6.53989e-16	0.277895	0.32	0.218	1.06685e-11	2
	Cyp4f18	1.07086e-15	0.30676	0.392	0.284	1.7469e-11	2
	Csde1	1.12065e-15	0.255392	0.695	0.638	1.82812e-11	2
	Cd180	1.43637e-15	0.296413	0.263	0.164	2.34315e-11	2
	Sp100	2.47308e-15	0.28398	0.592	0.552	4.03433e-11	2
	Pdia4	2.61271e-15	0.30311	0.388	0.298	4.26211e-11	2
	P2ry10	2.82398e-15	0.334565	0.391	0.305	4.60676e-11	2
	Cmah	3.24243e-15	0.26992	0.314	0.211	5.28938e-11	2
	9930111J21Rik2	8.35609e-15	0.306489	0.385	0.297	1.36313e-10	2
	Atp2a3	1.16132e-14	0.287358	0.373	0.284	1.89446e-10	2
	Ptprj	1.74697e-14	0.267315	0.308	0.212	2.84984e-10	2
	Tmem131l	2.91703e-14	0.256645	0.323	0.231	4.75855e-10	2
	Mirt1	4.60641e-14	0.316924	0.394	0.305	7.51444e-10	2
	Samd9l	1.67226e-13	0.310173	0.402	0.329	2.72796e-09	2
	Phip	3.5887e-13	0.31499	0.471	0.42	5.85424e-09	2
	Ankrd44	1.07736e-12	0.288881	0.492	0.454	1.75749e-08	2
	Krit1	2.51639e-12	0.291023	0.462	0.41	4.10498e-08	2
	Acp5	8.31826e-12	0.252542	0.427	0.359	1.35696e-07	2
	Crlf3	1.01701e-11	0.317981	0.472	0.436	1.65905e-07	2
	Jmjd1c	1.08392e-11	0.283977	0.471	0.429	1.7682e-07	2
	Itsn2	1.3149e-11	0.259345	0.417	0.355	2.145e-07	2
	Mdm4	3.31572e-11	0.25484	0.365	0.296	5.40893e-07	2
	S100a6	8.46269e-11	0.409486	0.983	0.767	1.38052e-06	2
	Atf4	1.2626e-10	0.261189	0.549	0.532	2.05968e-06	2
	St8sia4	1.99549e-10	0.293106	0.421	0.367	3.25524e-06	2
	Pcmtd1	3.5857e-10	0.29166	0.403	0.349	5.84935e-06	2
	Iglc2	7.9378e-10	0.540732	0.591	0.43	1.29489e-05	2
	Zbtb20	1.63699e-09	0.541697	0.406	0.369	2.67042e-05	2
	Rapgef6	3.36679e-09	0.255028	0.402	0.351	5.49225e-05	2
	Atf7ip	2.42167e-08	0.275223	0.394	0.353	0.000395047	2
	Sypl	4.00282e-08	0.271297	0.334	0.289	0.000652981	2
	Kcnq1ot1	4.78323e-08	0.279734	0.439	0.39	0.000780289	2
	Ccl5	0	3.99267	0.973	0.125	0	3
	Gzma	0	3.68738	0.889	0.152	0	3
	Nkg7	0	2.91087	0.99	0.06	0	3
	AW112010	0	2.81824	0.987	0.227	0	3
	Gzmb	0	2.41351	0.863	0.017	0	3
	Ccl4	0	2.23597	0.838	0.181	0	3
	Prf1	0	2.10048	0.889	0.018	0	3
	Ms4a4b	0	1.947	0.967	0.078	0	3
	Il2rb	0	1.74881	0.957	0.038	0	3
	Klre1	0	1.7187	0.895	0.02	0	3
	Xcl1	0	1.70404	0.513	0.012	0	3
	Klrb1c	0	1.62799	0.908	0.014	0	3
	Klrd1	0	1.57813	0.946	0.09	0	3
	Ncr1	0	1.52221	0.847	0.013	0	3
	Klrk1	0	1.46197	0.898	0.06	0	3
	Serpinb9	0	1.37388	0.83	0.037	0	3
	Klra4	0	1.33227	0.411	0.006	0	3
	Klra7	0	1.29689	0.535	0.01	0	3
	Ctsw	0	1.26944	0.858	0.021	0	3
	Klra9	0	1.2609	0.489	0.008	0	3
	Klra8	0	1.19223	0.454	0.008	0	3
	Hcst	0	1.12861	0.895	0.277	0	3
	Ifng	0	1.12178	0.49	0.009	0	3
	Klrc2	0	1.11861	0.753	0.011	0	3
	Serpinb6b	0	1.11647	0.704	0.043	0	3
	Ugcg	0	1.08961	0.868	0.213	0	3
	Spry2	0	1.07607	0.677	0.054	0	3
	Sh2d2a	0	0.976946	0.812	0.181	0	3
	Klrc1	0	0.909696	0.46	0.008	0	3
	Klrb1a	0	0.843254	0.57	0.007	0	3
	Fasl	0	0.828753	0.651	0.008	0	3
	Il18rap	0	0.817489	0.643	0.05	0	3
	Eomes	0	0.80843	0.561	0.007	0	3
	Klri2	0	0.79433	0.516	0.014	0	3
	Hsd11b1	0	0.701941	0.615	0.068	0	3
	Cst7	0	0.697932	0.578	0.029	0	3
	Gm2682	0	0.687406	0.53	0.007	0	3
	Sytl3	0	0.685518	0.591	0.083	0	3
	Klrg1	0	0.671533	0.506	0.041	0	3
	Cma1	0	0.65663	0.551	0.023	0	3
	Arsb	0	0.59551	0.548	0.053	0	3
	Klrb1f	0	0.573792	0.457	0.014	0	3
	Gm19585	0	0.56049	0.498	0.02	0	3
	Il18r1	0	0.548228	0.414	0.017	0	3
	Osbpl3	0	0.499574	0.452	0.039	0	3
	Samd3	0	0.487832	0.43	0.004	0	3
	Tbx21	0	0.463781	0.404	0.005	0	3
	Itga2	0	0.450644	0.373	0.007	0	3
	Adamts14	0	0.415411	0.361	0.005	0	3
	S1pr5	0	0.368013	0.323	0.014	0	3
	Ifitm10	0	0.353016	0.325	0.011	0	3
	Dapk2	0	0.277292	0.255	0.004	0	3
	Irf8	6.68384e-306	1.55579	0.9	0.346	1.09034e-301	3
	Lpin1	3.89582e-304	0.540006	0.486	0.053	6.35525e-300	3
	Ccl3	2.94961e-300	1.58469	0.674	0.12	4.81169e-296	3
	Camk2n1	1.08191e-294	0.538862	0.454	0.046	1.76492e-290	3
	Pde2a	1.89965e-270	0.313716	0.268	0.011	3.0989e-266	3
	Gimap4	3.09709e-268	0.867384	0.772	0.203	5.05228e-264	3
	Tnfrsf9	3.36866e-257	0.505139	0.287	0.015	5.4953e-253	3
	Car2	2.72721e-256	0.516787	0.382	0.036	4.4489e-252	3
	Atp1b1	2.53637e-253	0.628669	0.6	0.108	4.13759e-249	3
	Vps37b	1.66579e-249	1.07722	0.89	0.354	2.71741e-245	3
	Il12rb2	2.88893e-248	0.308919	0.282	0.016	4.71272e-244	3
	Id2	1.89251e-237	1.09667	0.893	0.345	3.08725e-233	3
	Gpc1	1.30895e-236	0.353325	0.318	0.025	2.1353e-232	3
	Sytl2	2.83626e-236	0.311739	0.288	0.018	4.6268e-232	3
	Pik3r1	9.57564e-236	0.927474	0.818	0.287	1.56207e-231	3
	Cd200r4	1.54395e-235	0.253486	0.253	0.012	2.51864e-231	3
	Cd7	4.86622e-234	0.701696	0.389	0.042	7.93826e-230	3
	Spn	8.31448e-234	0.726605	0.704	0.176	1.35634e-229	3
	Qrfp	1.93386e-233	0.320175	0.253	0.013	3.15471e-229	3
	Klrb1b	4.17358e-231	0.517074	0.39	0.043	6.80837e-227	3
	Itgb2	2.15333e-223	0.913935	0.885	0.359	3.51273e-219	3
	Txk	5.25198e-222	0.848575	0.877	0.297	8.56756e-218	3
	Chsy1	1.93644e-217	0.525378	0.511	0.091	3.15891e-213	3
	Tmsb10	7.00257e-216	1.05523	1	0.963	1.14233e-211	3
	Fcer1g	5.05836e-211	1.11963	0.97	0.615	8.2517e-207	3
	Lgals1	4.52568e-209	1.28343	0.96	0.657	7.38275e-205	3
	Cd244	4.0639e-202	0.482683	0.46	0.076	6.62944e-198	3
	H2-Q7	1.20495e-195	0.953241	0.963	0.641	1.96563e-191	3
	Dusp2	8.57643e-189	1.04388	0.806	0.322	1.39907e-184	3
	Ccnd2	1.3561e-187	0.855307	0.775	0.288	2.21221e-183	3
	H2-K1	5.53751e-184	0.815126	1	0.934	9.03334e-180	3
	Dok2	1.36163e-183	0.557786	0.626	0.162	2.22123e-179	3
	Gem	1.40837e-181	0.79361	0.604	0.159	2.29748e-177	3
	Ptpn22	1.10259e-180	0.70824	0.82	0.315	1.79866e-176	3
	Myl6	1.94088e-178	0.735548	0.998	0.965	3.16615e-174	3
	Tyrobp	3.15608e-176	0.986555	0.957	0.676	5.14851e-172	3
	AC163354.1	1.5881e-174	0.379109	0.255	0.022	2.59067e-170	3
	Hopx	1.25442e-170	0.639323	0.559	0.142	2.04633e-166	3
	Rgs1	2.21066e-169	1.01598	0.736	0.257	3.60624e-165	3
	Bcl2	1.22301e-165	0.824116	0.775	0.31	1.99509e-161	3
	Itgal	1.22784e-165	0.671471	0.793	0.308	2.00298e-161	3
	Padi2	3.99879e-162	0.37883	0.408	0.072	6.52323e-158	3
	Tmsb4x	2.78357e-161	0.825985	1	0.999	4.54085e-157	3
	Ptprc	5.47425e-159	0.727028	0.998	0.917	8.93014e-155	3
	Pfn1	5.11147e-158	0.744974	1	0.989	8.33834e-154	3
	Fyn	5.67601e-157	0.556965	0.605	0.176	9.25927e-153	3
	Rac2	1.91925e-156	0.6356	0.99	0.88	3.13087e-152	3
	Prkch	4.51639e-156	0.426058	0.455	0.096	7.36758e-152	3
	Jak1	3.14366e-155	0.693714	0.946	0.686	5.12825e-151	3
	Pla2g16	3.4054e-154	0.462453	0.522	0.13	5.55523e-150	3
	Rab37	8.01285e-154	0.274351	0.282	0.034	1.30714e-149	3
	Tnfsf12	3.84113e-146	0.398006	0.425	0.086	6.26604e-142	3
	Nr4a2	1.24902e-145	0.687488	0.629	0.198	2.03753e-141	3
	Ifngr1	2.25318e-144	0.780616	0.97	0.71	3.67561e-140	3
	Bhlhe40	6.19764e-144	0.591236	0.685	0.225	1.01102e-139	3
	Peak1	1.04903e-140	0.430956	0.494	0.123	1.71128e-136	3
	1700025G04Rik	1.15679e-140	0.419769	0.441	0.099	1.88707e-136	3
	Anxa6	3.08842e-140	0.552617	0.645	0.228	5.03813e-136	3
	Bin2	1.45338e-138	0.563188	0.693	0.271	2.37089e-134	3
	Gimap5	1.54702e-138	0.599801	0.639	0.218	2.52365e-134	3
	Runx3	6.68735e-138	0.608361	0.615	0.205	1.09091e-133	3
	Gimap3	5.7161e-134	0.548687	0.694	0.249	9.32468e-130	3
	Ctla2a	1.2383e-133	0.489766	0.506	0.124	2.02005e-129	3
	Cd52	5.17793e-132	0.657097	1	0.923	8.44676e-128	3
	Stat4	1.28106e-129	0.466885	0.548	0.163	2.08979e-125	3
	S100a10	2.57113e-125	0.629575	0.995	0.841	4.19429e-121	3
	Ctsd	2.27434e-124	0.447212	0.936	0.559	3.71012e-120	3
	Prex1	1.28988e-120	0.525616	0.619	0.233	2.10418e-116	3
	Ptpn18	1.27935e-119	0.582964	0.987	0.861	2.087e-115	3
	Ccr5	5.62445e-118	0.542599	0.54	0.169	9.17517e-114	3
	D16Ertd472e	3.74607e-117	0.472971	0.533	0.168	6.11097e-113	3
	Zfp36l2	9.21618e-114	0.65197	0.968	0.793	1.50344e-109	3
	H2-D1	3.90448e-113	0.541496	1	0.955	6.36938e-109	3
	Adora2a	9.74054e-112	0.339615	0.377	0.087	1.58897e-107	3
	Lfng	2.16597e-111	0.462338	0.449	0.125	3.53335e-107	3
	Sema4a	5.31459e-111	0.397529	0.484	0.141	8.66968e-107	3
	Rgs3	5.71448e-111	0.289737	0.318	0.063	9.32203e-107	3
	Efhd2	1.87569e-108	0.513424	0.718	0.308	3.05981e-104	3
	Gsap	8.48067e-108	0.330956	0.379	0.091	1.38345e-103	3
	S100a13	2.06267e-107	0.584259	0.761	0.413	3.36483e-103	3
	Cd9	6.63448e-107	0.303254	0.731	0.284	1.08228e-102	3
	Tpst2	1.93592e-104	0.435574	0.527	0.184	3.15806e-100	3
	Rap1b	1.09918e-101	0.579183	0.892	0.678	1.79309e-97	3
	Pitpnc1	2.19894e-101	0.390034	0.514	0.167	3.58713e-97	3
	2020-09-11	1.4353e-100	0.495979	0.696	0.312	2.3414e-96	3
	Zfpm1	3.38393e-99	0.278218	0.331	0.075	5.5202e-95	3
	Fgl2	6.58112e-98	0.428505	0.545	0.186	1.07358e-93	3
	Rnaset2b	1.7515e-96	0.503666	0.729	0.368	2.85723e-92	3
	Emp3	1.45943e-94	0.549763	0.954	0.781	2.38077e-90	3
	Anxa2	3.62463e-94	0.510293	0.914	0.659	5.91286e-90	3
	Ubald2	1.16544e-93	0.554101	0.697	0.348	1.90118e-89	3
	Ptprcap	1.65221e-93	0.479975	0.984	0.777	2.69525e-89	3
	Prkcq	2.22558e-93	0.306953	0.392	0.105	3.63059e-89	3
	2020-09-01	1.8964e-92	0.509476	0.826	0.537	3.0936e-88	3
	H2afz	2.82791e-91	0.459557	0.99	0.896	4.61317e-87	3
	Vasp	1.83873e-90	0.522121	0.699	0.359	2.99952e-86	3
	As3mt	5.573e-90	0.331254	0.314	0.076	9.09123e-86	3
	Selplg	8.46537e-90	0.49588	0.959	0.73	1.38096e-85	3
	Ttc39b	1.00686e-88	0.271327	0.328	0.08	1.64248e-84	3
	Cnn2	1.80457e-88	0.471392	0.664	0.321	2.94379e-84	3
	Epsti1	5.1508e-87	0.492807	0.688	0.342	8.4025e-83	3
	Ahnak	2.36185e-86	0.433949	0.955	0.647	3.85288e-82	3
	Cd48	6.99625e-86	0.472216	0.761	0.406	1.1413e-81	3
	Cox8a	6.42106e-85	0.420569	0.997	0.967	1.04747e-80	3
	Borcs7	1.36324e-84	0.364144	0.393	0.122	2.22386e-80	3
	Kcnab2	1.42269e-84	0.339008	0.4	0.123	2.32083e-80	3
	H2-Q6	1.36507e-83	0.496095	0.701	0.348	2.22684e-79	3
	Serf2	2.91219e-83	0.393753	1	0.989	4.75066e-79	3
	Rinl	7.71975e-83	0.36963	0.51	0.19	1.25932e-78	3
	Tpm4	1.34105e-82	0.49997	0.713	0.381	2.18766e-78	3
	Gimap7	3.38517e-82	0.383243	0.396	0.125	5.52223e-78	3
	Slamf7	1.58604e-81	0.385096	0.481	0.171	2.5873e-77	3
	B2m	7.79949e-81	0.376099	1	0.973	1.27233e-76	3
	Ostf1	3.26225e-80	0.438829	0.9	0.695	5.32171e-76	3
	Actg1	7.2921e-80	0.394045	1	0.992	1.18956e-75	3
	Actb	1.30436e-79	0.517984	1	1	2.1278e-75	3
	Atp2b4	3.03092e-79	0.255905	0.283	0.066	4.94433e-75	3
	Lax1	1.04119e-78	0.305506	0.355	0.102	1.69849e-74	3
	Neurl3	5.35177e-77	0.431412	0.76	0.388	8.73034e-73	3
	Itga4	8.18249e-77	0.558568	0.818	0.583	1.33481e-72	3
	Itgb1	1.269e-76	0.523431	0.822	0.55	2.07012e-72	3
	Tnfaip3	3.77673e-76	0.421176	0.717	0.357	6.16099e-72	3
	Agpat3	7.28177e-76	0.321096	0.432	0.15	1.18787e-71	3
	Arpc1b	8.0917e-76	0.404593	0.994	0.915	1.32e-71	3
	Plek	1.47932e-75	0.439248	0.664	0.319	2.41321e-71	3
	Ly6c2	1.50144e-75	0.590479	0.381	0.119	2.44929e-71	3
	Gm45716	1.77201e-75	0.265178	0.266	0.062	2.89069e-71	3
	Gnptg	8.25591e-75	0.269949	0.325	0.09	1.34679e-70	3
	Tes	2.73198e-74	0.329894	0.443	0.158	4.45667e-70	3
	Ywhaq	3.42894e-74	0.461705	0.777	0.502	5.59363e-70	3
	Tln1	1.18903e-73	0.445513	0.917	0.774	1.93967e-69	3
	Ndfip2	1.68144e-72	0.375233	0.497	0.201	2.74294e-68	3
	Dennd4a	4.99047e-72	0.475495	0.866	0.613	8.14095e-68	3
	Gimap8	3.47552e-71	0.296733	0.395	0.131	5.66962e-67	3
	Esyt1	3.54166e-71	0.387678	0.626	0.3	5.77751e-67	3
	Abracl	1.15316e-70	0.435666	0.892	0.709	1.88116e-66	3
	Pfkp	1.50626e-70	0.349951	0.521	0.211	2.45716e-66	3
	Btg1	3.91002e-69	0.4337	0.989	0.919	6.37842e-65	3
	Zyx	1.15155e-67	0.37096	0.621	0.292	1.87852e-63	3
	Arl6ip5	5.12438e-66	0.37866	0.669	0.35	8.35939e-62	3
	Itgam	2.25897e-65	0.309687	0.541	0.221	3.68505e-61	3
	Dnajc1	7.20573e-65	0.349547	0.516	0.223	1.17547e-60	3
	Fxyd5	1.89313e-64	0.289198	0.978	0.825	3.08827e-60	3
	Tspo	2.29681e-63	0.297489	0.968	0.815	3.74679e-59	3
	Atp5h	4.10747e-63	0.341297	0.989	0.935	6.70051e-59	3
	Ppp1r12a	5.48467e-63	0.396102	0.712	0.409	8.94715e-59	3
	Cdc42	4.60103e-62	0.347737	0.989	0.94	7.50567e-58	3
	Klf2	2.25691e-61	0.590355	0.951	0.77	3.6817e-57	3
	Atp1b3	8.99679e-61	0.374631	0.618	0.313	1.46765e-56	3
	Cap1	3.20381e-60	0.402914	0.629	0.342	5.22638e-56	3
	Arpc2	2.18403e-59	0.350387	0.992	0.941	3.56281e-55	3
	Gramd4	3.74521e-59	0.295171	0.392	0.148	6.10956e-55	3
	Calm2	5.61815e-59	0.357002	0.939	0.821	9.16489e-55	3
	Gimap1	1.43491e-58	0.391124	0.72	0.398	2.34076e-54	3
	S1pr4	7.95235e-58	0.262047	0.32	0.105	1.29727e-53	3
	Ccdc88c	1.12072e-57	0.357753	0.575	0.28	1.82822e-53	3
	Lasp1	5.57991e-57	0.290623	0.47	0.202	9.1025e-53	3
	Gpr65	6.34741e-57	0.339685	0.564	0.267	1.03545e-52	3
	Malt1	2.7194e-56	0.365415	0.677	0.354	4.43615e-52	3
	Reep5	7.91083e-56	0.391969	0.874	0.699	1.29049e-51	3
	Myl12a	1.31939e-55	0.393696	0.803	0.634	2.15232e-51	3
	Dusp5	6.31207e-55	0.374842	0.701	0.414	1.02969e-50	3
	Cd2	7.5623e-55	0.310613	0.705	0.357	1.23364e-50	3
	Sh3bgrl3	1.14507e-54	0.355601	0.998	0.979	1.86795e-50	3
	Gm28875	1.31114e-54	0.272249	0.355	0.132	2.13886e-50	3
	Tm6sf1	2.78479e-54	0.338583	0.68	0.371	4.54282e-50	3
	Fryl	1.32398e-53	0.331213	0.468	0.212	2.15981e-49	3
	Ankrd44	1.35646e-53	0.388877	0.717	0.434	2.2128e-49	3
	Itgb7	1.75185e-53	0.361577	0.653	0.34	2.8578e-49	3
	Dock2	6.14596e-53	0.395708	0.804	0.605	1.00259e-48	3
	Coro2a	4.54373e-52	0.270077	0.401	0.161	7.41218e-48	3
	Vgll4	1.0427e-51	0.348201	0.541	0.27	1.70096e-47	3
	Ndufa4	1.19425e-51	0.288809	0.982	0.904	1.94818e-47	3
	Gnas	1.75683e-51	0.315646	0.979	0.935	2.86592e-47	3
	H2-Q4	2.75712e-50	0.36106	0.732	0.446	4.49769e-46	3
	Leprotl1	4.0868e-50	0.314373	0.619	0.333	6.66679e-46	3
	Arap2	1.24093e-49	0.336966	0.524	0.253	2.02433e-45	3
	B4galnt1	6.37539e-49	0.3344	0.618	0.344	1.04002e-44	3
	Ppp1r18	6.44865e-49	0.318876	0.576	0.314	1.05197e-44	3
	Nup210	6.30555e-47	0.299975	0.473	0.225	1.02862e-42	3
	Tulp4	1.01961e-46	0.277016	0.387	0.163	1.66329e-42	3
	Laptm5	2.63432e-46	0.303185	0.986	0.865	4.29736e-42	3
	Capzb	6.11467e-45	0.311764	0.896	0.762	9.97486e-41	3
	Arhgdib	7.69096e-45	0.302017	0.979	0.933	1.25463e-40	3
	Evl	3.74143e-44	0.298388	0.475	0.24	6.10339e-40	3
	Tecpr1	6.44687e-44	0.331853	0.554	0.294	1.05168e-39	3
	Rnaset2a	2.02578e-43	0.326085	0.734	0.505	3.30466e-39	3
	Lat2	1.14927e-42	0.284588	0.529	0.277	1.87481e-38	3
	Zeb2	1.835e-42	0.305891	0.615	0.333	2.99343e-38	3
	Cfl1	6.87615e-42	0.305205	0.994	0.977	1.12171e-37	3
	Nab1	7.5704e-42	0.250053	0.368	0.16	1.23496e-37	3
	Adgre5	7.0214e-41	0.359155	0.798	0.606	1.1454e-36	3
	Smad7	9.14254e-41	0.336398	0.553	0.299	1.49142e-36	3
	Dad1	1.44265e-40	0.309133	0.895	0.816	2.35339e-36	3
	Gimap9	2.27332e-40	0.261999	0.482	0.24	3.70846e-36	3
	Prr13	1.20329e-39	0.286975	0.634	0.39	1.96292e-35	3
	Stk24	1.41476e-39	0.301288	0.613	0.369	2.3079e-35	3
	Clec2d	3.69332e-39	0.278414	0.502	0.265	6.02491e-35	3
	Aes	5.97406e-39	0.270248	0.935	0.815	9.74548e-35	3
	Cetn2	4.24056e-38	0.254287	0.452	0.232	6.91763e-34	3
	Rnaseh2c	2.37559e-36	0.280497	0.562	0.334	3.8753e-32	3
	Pdcd10	3.13264e-36	0.296308	0.621	0.403	5.11027e-32	3
	Tma7	3.25794e-36	0.262158	0.951	0.891	5.31467e-32	3
	Sell	5.38905e-36	0.284363	0.656	0.4	8.79115e-32	3
	Mbnl1	7.5393e-36	0.263979	0.952	0.862	1.22989e-31	3
	Lrrfip1	1.73367e-35	0.282271	0.594	0.362	2.82814e-31	3
	Riok1	1.09522e-34	0.282434	0.439	0.235	1.78664e-30	3
	Junb	3.25628e-34	0.282286	0.965	0.917	5.31197e-30	3
	Cyfip2	4.34139e-34	0.267336	0.537	0.313	7.08211e-30	3
	Cast	5.22162e-34	0.2761	0.565	0.339	8.51803e-30	3
	Vps28	8.63596e-33	0.272582	0.567	0.358	1.40878e-28	3
	Ikzf1	1.21508e-32	0.261573	0.667	0.436	1.98217e-28	3
	Stat3	2.12104e-31	0.275084	0.522	0.308	3.46005e-27	3
	Myl12b	4.43688e-31	0.268671	0.892	0.796	7.23788e-27	3
	Shisa5	6.11585e-31	0.338301	0.903	0.834	9.97679e-27	3
	Myh9	1.8345e-30	0.268688	0.857	0.743	2.99263e-26	3
	Pnrc1	2.01043e-30	0.265558	0.906	0.802	3.27961e-26	3
	Otulin	4.51182e-30	0.299972	0.502	0.308	7.36014e-26	3
	Taf10	2.21005e-29	0.278744	0.814	0.693	3.60525e-25	3
	Gabarapl2	2.55816e-28	0.271526	0.678	0.518	4.17313e-24	3
	Gimap6	3.05258e-28	0.2613	0.787	0.583	4.97967e-24	3
	1810058I24Rik	3.59543e-28	0.255906	0.572	0.374	5.86523e-24	3
	Hist1h1e	7.37055e-28	0.252048	0.527	0.314	1.20236e-23	3
	Xrn2	3.84233e-27	0.254607	0.611	0.41	6.268e-23	3
	Dpm3	7.03288e-26	0.250571	0.685	0.497	1.14727e-21	3
	Sri	8.31489e-26	0.253194	0.736	0.607	1.35641e-21	3
	Mzb1	0	1.37389	0.921	0.239	0	4
	Bhlhe41	0	0.557282	0.52	0.049	0	4
	Zbtb32	0	0.446199	0.445	0.028	0	4
	Blk	8.90428e-298	0.591873	0.693	0.123	1.45255e-293	4
	Gm15228	2.83047e-297	0.417443	0.445	0.041	4.61735e-293	4
	Nid1	2.93272e-297	0.386477	0.433	0.038	4.78415e-293	4
	Iglc3	3.27982e-294	1.0809	0.915	0.245	5.35038e-290	4
	Iglc1	1.55749e-289	1.88268	0.762	0.155	2.54074e-285	4
	Pou2af1	8.49098e-284	0.697131	0.764	0.162	1.38513e-279	4
	Oosp1	1.69211e-283	0.286122	0.279	0.011	2.76033e-279	4
	Rpl13	5.91134e-281	0.846582	1	0.999	9.64317e-277	4
	Iglc2	2.05893e-279	1.36478	0.973	0.397	3.35873e-275	4
	Pkig	2.44685e-279	0.873661	0.921	0.307	3.99155e-275	4
	Lmo7	2.67504e-276	0.362957	0.339	0.022	4.36379e-272	4
	Krt222	3.01185e-267	0.293911	0.303	0.017	4.91323e-263	4
	Rps12	5.32013e-267	0.895213	0.994	0.997	8.67872e-263	4
	Rps7	5.20695e-257	0.787555	0.995	0.997	8.4941e-253	4
	Ahnak2	5.25299e-256	0.453637	0.363	0.03	8.5692e-252	4
	Rps5	1.39119e-254	0.782379	0.994	0.994	2.26945e-250	4
	Rpl32	2.76714e-253	0.779306	0.992	0.996	4.51404e-249	4
	Rpl39	1.78456e-251	0.782163	0.995	0.998	2.91115e-247	4
	Rps20	1.30815e-249	0.793528	0.998	0.997	2.13398e-245	4
	Rps18	1.56478e-247	0.785931	0.995	0.993	2.55262e-243	4
	Rps19	7.4992e-245	0.799509	0.995	0.996	1.22334e-240	4
	Rps24	4.11698e-244	0.757796	1	0.999	6.71603e-240	4
	Il5ra	3.00322e-240	0.356935	0.409	0.044	4.89916e-236	4
	Rps4x	4.51307e-239	0.689756	0.998	0.996	7.36216e-235	4
	Rpl21	8.82847e-239	0.707971	0.995	0.996	1.44019e-234	4
	Rps13	2.528e-238	0.676922	0.992	0.999	4.12393e-234	4
	Rpl9	4.33973e-236	0.64909	0.998	0.999	7.07941e-232	4
	Rpsa	8.15766e-236	0.72122	0.998	0.997	1.33076e-231	4
	Rps3a1	3.64863e-235	0.649453	1	0.998	5.95202e-231	4
	Rpl23	2.58593e-234	0.660187	1	0.999	4.21843e-230	4
	Cd2	4.12817e-229	0.892113	0.91	0.339	6.73429e-225	4
	Rplp0	7.9694e-229	0.721872	0.997	0.997	1.30005e-224	4
	Pmf1	5.46855e-228	0.580371	0.687	0.165	8.92085e-224	4
	Rpl30	9.10956e-228	0.644675	0.995	1	1.48604e-223	4
	Rps3	1.22126e-227	0.636905	0.997	0.996	1.99225e-223	4
	Rpl35	1.68779e-227	0.683861	0.994	0.991	2.7533e-223	4
	Tppp	4.78597e-227	0.274707	0.319	0.026	7.80735e-223	4
	Dnase1l3	5.54711e-227	0.335257	0.348	0.032	9.049e-223	4
	Rpl36	1.79211e-224	0.676409	0.992	0.995	2.92347e-220	4
	Rpl37a	5.31685e-224	0.643308	0.998	1	8.67337e-220	4
	Rpl27a	1.43355e-222	0.618249	0.998	0.999	2.33855e-218	4
	Cacna1s	1.61688e-221	0.304423	0.31	0.025	2.63761e-217	4
	Rpl37	3.90618e-220	0.625543	0.995	1	6.37215e-216	4
	Rplp1	7.94116e-220	0.683459	0.997	0.999	1.29544e-215	4
	Rpl18a	2.15915e-218	0.640763	1	0.999	3.52221e-214	4
	Rpl34	2.18315e-217	0.597958	0.995	0.998	3.56137e-213	4
	Rpl38	3.10064e-217	0.64558	0.997	0.998	5.05808e-213	4
	Rpl3	6.40983e-217	0.71646	0.995	0.987	1.04564e-212	4
	Cxcr5	5.29954e-215	0.425055	0.571	0.105	8.64513e-211	4
	Ighm	4.85268e-214	1.56961	0.987	0.761	7.91618e-210	4
	Rps15a	1.48919e-212	0.661902	0.992	0.996	2.42932e-208	4
	Rpl10a	4.91999e-212	0.685431	0.992	0.988	8.02598e-208	4
	Rpl19	3.90898e-211	0.584532	0.995	0.998	6.37672e-207	4
	Pafah1b3	8.00779e-211	0.652317	0.685	0.182	1.30631e-206	4
	Rps8	2.9215e-210	0.603565	1	0.999	4.76585e-206	4
	Sh3bp5	4.05402e-210	0.513252	0.673	0.161	6.61332e-206	4
	Rps2	1.08247e-208	0.664776	0.995	0.996	1.76584e-204	4
	Rpl8	4.81053e-208	0.566992	1	0.997	7.84741e-204	4
	Rpl18	2.85957e-207	0.561478	0.997	0.997	4.66482e-203	4
	Cd79b	3.26156e-207	0.899686	0.987	0.524	5.32058e-203	4
	Rps27	5.58786e-207	0.678499	0.998	1	9.11547e-203	4
	Rps27a	1.62703e-206	0.561369	1	1	2.65418e-202	4
	Plac8	5.48236e-203	1.03022	0.957	0.644	8.94337e-199	4
	Rps10	1.03041e-202	0.576849	0.995	0.999	1.68091e-198	4
	Rpl14	7.64351e-201	0.617677	0.99	0.978	1.24689e-196	4
	Rpl22	3.70946e-200	0.590371	0.99	0.989	6.05124e-196	4
	Rps9	3.03029e-198	0.544672	0.997	1	4.94332e-194	4
	Sox5	1.6629e-197	0.255283	0.284	0.024	2.71269e-193	4
	Rpl36a	2.46681e-196	0.657603	0.99	0.982	4.02411e-192	4
	Rpl17	1.71845e-195	0.621195	0.99	0.993	2.80331e-191	4
	Rps11	5.40914e-194	0.585164	0.994	0.998	8.82393e-190	4
	Zfp811	3.09685e-192	0.405796	0.281	0.024	5.05189e-188	4
	Rps28	1.01128e-190	0.571337	0.992	0.997	1.6497e-186	4
	Diras2	2.02141e-190	0.252287	0.276	0.023	3.29752e-186	4
	Rpl6	3.25959e-190	0.547638	0.995	0.995	5.31738e-186	4
	Rpl41	6.92214e-189	0.517654	1	1	1.12921e-184	4
	Rps21	6.93855e-187	0.543165	0.997	1	1.13189e-182	4
	Prkar2b	5.71003e-186	0.477151	0.474	0.087	9.31478e-182	4
	AC125149.3	2.28799e-185	0.372969	0.451	0.077	3.73239e-181	4
	C130026I21Rik	3.59021e-185	0.416286	0.496	0.095	5.8567e-181	4
	Uchl3	5.8168e-184	0.705643	0.735	0.242	9.48894e-180	4
	Ms4a1	6.32421e-181	0.809048	0.944	0.445	1.03167e-176	4
	Ly6a	2.39957e-178	0.917728	0.926	0.504	3.91442e-174	4
	Rpl26	7.14311e-178	0.540137	0.995	0.99	1.16526e-173	4
	Tppp3	7.50339e-178	0.906469	0.559	0.137	1.22403e-173	4
	Bank1	1.82155e-177	0.607153	0.843	0.277	2.9715e-173	4
	Rps16	1.42336e-176	0.521968	0.998	0.999	2.32192e-172	4
	Capg	4.71066e-175	0.637809	0.904	0.382	7.68451e-171	4
	Rpl7	7.7753e-174	0.494404	0.995	0.996	1.26839e-169	4
	Rpl11	7.99547e-173	0.495643	0.997	0.997	1.3043e-168	4
	Rpl12	1.19732e-171	0.621806	0.99	0.976	1.95319e-167	4
	Igkc	4.50686e-171	1.9156	0.944	0.687	7.35204e-167	4
	Eef1b2	1.13552e-170	0.587551	0.986	0.973	1.85238e-166	4
	Rpl35a	1.1971e-167	0.469362	0.995	0.999	1.95282e-163	4
	Rpl10	5.88688e-166	0.491054	0.998	0.998	9.60326e-162	4
	Eef1a1	6.22521e-166	0.498139	1	0.999	1.01552e-161	4
	H2-DMb2	2.33578e-165	0.590019	0.854	0.302	3.81035e-161	4
	Rpl29	3.61531e-165	0.55511	0.992	0.977	5.89766e-161	4
	Snn	8.22672e-164	0.409772	0.581	0.141	1.34203e-159	4
	Cacna1e	5.22001e-162	0.326211	0.413	0.07	8.5154e-158	4
	Fau	7.66989e-162	0.472932	1	1	1.25119e-157	4
	Hint1	8.44658e-162	0.681629	0.97	0.877	1.37789e-157	4
	Rps29	2.65017e-161	0.451304	1	1	4.32323e-157	4
	Fam43a	2.72648e-158	0.449645	0.57	0.141	4.44771e-154	4
	Siglecg	2.04627e-156	0.496942	0.77	0.251	3.33809e-152	4
	Zcwpw1	4.31117e-156	0.871543	0.361	0.06	7.03281e-152	4
	Tcp11l2	4.13889e-154	0.454695	0.64	0.188	6.75177e-150	4
	Rps23	1.74201e-152	0.465011	0.994	0.998	2.84174e-148	4
	Spib	2.41937e-152	0.410183	0.589	0.152	3.94671e-148	4
	Cd79a	2.59936e-152	0.78501	0.992	0.589	4.24033e-148	4
	Rack1	2.83032e-151	0.478147	0.992	0.99	4.6171e-147	4
	Rps26	1.24293e-149	0.488759	0.99	0.995	2.02759e-145	4
	Klf2	1.84236e-148	0.795186	0.968	0.769	3.00544e-144	4
	Vim	4.15786e-147	0.963869	0.957	0.858	6.78272e-143	4
	Dnajc7	3.04206e-145	0.717663	0.849	0.45	4.96251e-141	4
	Rpl27	2.48368e-144	0.448816	0.994	0.991	4.05163e-140	4
	Crip1	1.67447e-143	1.05313	0.974	0.965	2.73157e-139	4
	Gm15987	2.26289e-142	0.381617	0.507	0.122	3.69146e-138	4
	Pdlim1	1.37301e-139	0.502288	0.703	0.25	2.23979e-135	4
	Pcmtd1	1.05508e-138	0.592921	0.772	0.317	1.72115e-134	4
	Rplp2	3.18727e-137	0.40181	0.992	0.997	5.19939e-133	4
	Fcrla	1.28035e-136	0.443207	0.719	0.23	2.08864e-132	4
	Rab30	1.95732e-136	0.318202	0.352	0.062	3.19298e-132	4
	Rps14	1.99978e-136	0.42401	0.992	0.998	3.26224e-132	4
	Phgdh	1.22641e-134	0.43755	0.648	0.204	2.00064e-130	4
	Gimap4	3.87047e-132	0.385051	0.679	0.212	6.3139e-128	4
	S1pr1	7.23754e-131	0.419997	0.655	0.205	1.18066e-126	4
	Prr5	4.5301e-130	0.25002	0.319	0.053	7.38995e-126	4
	Rpl24	4.5514e-130	0.442628	0.992	0.994	7.42469e-126	4
	Snx2	1.12397e-129	0.484765	0.782	0.322	1.83353e-125	4
	Napsa	2.57193e-128	0.626603	0.944	0.628	4.19559e-124	4
	Cd19	3.50773e-128	0.359718	0.661	0.202	5.72216e-124	4
	Tagln2	5.96442e-128	0.794117	0.894	0.735	9.72976e-124	4
	Rpl15	9.37343e-127	0.433697	0.992	0.993	1.52909e-122	4
	Rpl28	7.88677e-124	0.423071	0.997	0.997	1.28657e-119	4
	Uba52	2.45241e-123	0.54942	0.997	0.983	4.00062e-119	4
	Rps6	5.27352e-123	0.450413	0.992	0.98	8.60269e-119	4
	Cd37	8.76006e-123	0.534451	0.952	0.658	1.42903e-118	4
	Abhd17b	6.06683e-120	0.394466	0.579	0.183	9.89682e-116	4
	A530040E14Rik	7.07783e-120	0.282478	0.38	0.08	1.15461e-115	4
	Fgd2	1.86363e-119	0.342407	0.515	0.143	3.04015e-115	4
	Kctd14	7.02228e-119	0.260811	0.294	0.049	1.14555e-114	4
	Aldh2	9.46736e-118	0.493369	0.762	0.328	1.54441e-113	4
	Vars	5.51984e-117	0.433152	0.711	0.281	9.00451e-113	4
	Eef1g	3.63547e-116	0.484288	0.958	0.831	5.93054e-112	4
	Rps25	1.17541e-115	0.408537	0.99	0.979	1.91745e-111	4
	Tpt1	1.66986e-115	0.37257	1	1	2.72404e-111	4
	Pdia4	1.83797e-113	0.499092	0.693	0.272	2.99828e-109	4
	Fcmr	1.45618e-112	0.495795	0.742	0.27	2.37546e-108	4
	Cnp	1.53633e-112	0.447126	0.717	0.297	2.50621e-108	4
	Txndc5	1.61283e-112	0.564593	0.543	0.168	2.631e-108	4
	Rps15	2.43947e-112	0.424637	0.987	0.974	3.97951e-108	4
	Ckap4	6.36462e-112	0.328913	0.451	0.118	1.03826e-107	4
	Rassf4	6.63759e-112	0.422864	0.657	0.231	1.08279e-107	4
	Blnk	1.73028e-111	0.351436	0.613	0.202	2.82261e-107	4
	Ctla4	2.20874e-111	0.451746	0.422	0.106	3.60312e-107	4
	Rpl4	2.9682e-110	0.428751	0.984	0.964	4.84203e-106	4
	Rpl5	1.40928e-108	0.411988	0.989	0.98	2.29896e-104	4
	Cd38	8.68169e-108	0.349296	0.563	0.178	1.41624e-103	4
	Myc	1.57189e-107	0.380969	0.437	0.117	2.56422e-103	4
	Eif3f	2.33065e-106	0.43702	0.974	0.89	3.80199e-102	4
	Ass1	1.60093e-105	0.382565	0.49	0.147	2.6116e-101	4
	Eef1d	1.80747e-105	0.440794	0.95	0.808	2.94852e-101	4
	1110059E24Rik	1.22386e-103	0.316795	0.478	0.141	1.99648e-99	4
	Rpl7a	2.58488e-103	0.390664	0.99	0.982	4.21671e-99	4
	Scd1	3.15208e-103	0.341874	0.714	0.259	5.14199e-99	4
	4930523C07Rik	1.02072e-102	0.539352	0.884	0.546	1.6651e-98	4
	Myo1e	1.32715e-101	0.290552	0.462	0.13	2.16498e-97	4
	Tnfrsf13b	1.45e-101	0.350805	0.604	0.216	2.36538e-97	4
	Sub1	9.79481e-101	0.493335	0.986	0.954	1.59783e-96	4
	Tmem154	1.00434e-100	0.266134	0.361	0.085	1.63838e-96	4
	H2-Ob	2.02591e-99	0.363251	0.758	0.293	3.30487e-95	4
	Zfp706	5.03058e-99	0.432817	0.878	0.562	8.20638e-95	4
	Pou2f2	5.70093e-99	0.47892	0.872	0.465	9.29993e-95	4
	Stt3b	8.91907e-97	0.407905	0.677	0.279	1.45497e-92	4
	S100a6	1.12898e-94	0.903134	0.915	0.774	1.84171e-90	4
	Rpl13a	6.26062e-94	0.413374	0.958	0.82	1.0213e-89	4
	Gimap7	2.30148e-92	0.282841	0.43	0.122	3.75441e-88	4
	Sp140	4.04458e-92	0.356681	0.604	0.231	6.59792e-88	4
	Tubb6	3.24308e-91	0.281468	0.388	0.105	5.29043e-87	4
	S100a10	1.38769e-89	0.519447	0.955	0.845	2.26373e-85	4
	Npm1	8.19412e-89	0.389303	0.984	0.961	1.33671e-84	4
	St6gal1	6.11074e-88	0.265754	0.411	0.116	9.96845e-84	4
	Pepd	1.11683e-87	0.309192	0.509	0.174	1.82189e-83	4
	Ero1lb	1.38513e-87	0.284811	0.474	0.152	2.25957e-83	4
	Gimap5	7.90712e-85	0.341458	0.586	0.223	1.28989e-80	4
	Lsp1	1.00023e-84	0.417753	0.944	0.795	1.63168e-80	4
	Lmna	1.46178e-84	0.40609	0.571	0.212	2.38461e-80	4
	Syk	2.65765e-84	0.435036	0.783	0.396	4.33542e-80	4
	Pax5	4.97837e-83	0.278284	0.571	0.202	8.12121e-79	4
	Gimap3	2.52433e-82	0.274695	0.653	0.253	4.11793e-78	4
	St3gal1	8.00041e-82	0.267927	0.465	0.154	1.30511e-77	4
	Jund	5.59874e-81	0.435054	0.992	0.969	9.13322e-77	4
	Tmem123	1.58713e-79	0.306198	0.687	0.307	2.58908e-75	4
	Wdfy4	2.46498e-79	0.261152	0.567	0.211	4.02112e-75	4
	Tcf4	4.16642e-79	0.332962	0.716	0.328	6.79669e-75	4
	Cd55	8.84123e-79	0.360736	0.642	0.258	1.44227e-74	4
	Naca	9.8642e-79	0.331077	0.986	0.978	1.60915e-74	4
	Rfk	1.3022e-78	0.251984	0.382	0.114	2.12428e-74	4
	Odc1	1.59372e-78	0.445034	0.687	0.327	2.59983e-74	4
	Nap1l1	1.82092e-78	0.41201	0.9	0.71	2.97046e-74	4
	Filip1l	9.72563e-76	0.326404	0.623	0.262	1.58654e-71	4
	Ebf1	1.75439e-75	0.294198	0.892	0.472	2.86193e-71	4
	Myadm	3.59365e-75	0.346889	0.623	0.264	5.86232e-71	4
	Map4k1	7.42817e-75	0.261023	0.467	0.163	1.21176e-70	4
	Ly6d	7.71006e-75	0.371315	0.979	0.726	1.25774e-70	4
	Ahnak	6.57382e-74	0.441675	0.905	0.652	1.07239e-69	4
	Smap2	1.4903e-73	0.383057	0.774	0.42	2.43113e-69	4
	2020-09-11	2.27592e-73	0.330959	0.684	0.313	3.71271e-69	4
	Rasa3	4.8608e-73	0.277401	0.531	0.204	7.92942e-69	4
	Cyp4f18	5.48362e-73	0.371854	0.621	0.264	8.94542e-69	4
	Eif3i	1.33424e-72	0.374839	0.827	0.525	2.17654e-68	4
	Tmod3	1.47714e-72	0.370916	0.722	0.37	2.40966e-68	4
	Fam46c	3.37524e-71	0.275148	0.289	0.075	5.50603e-67	4
	Rabgap1l	3.61385e-71	0.343267	0.717	0.344	5.89528e-67	4
	Pfdn5	5.9074e-71	0.327554	0.973	0.938	9.63674e-67	4
	Plp2	7.69364e-70	0.283652	0.549	0.222	1.25506e-65	4
	Ptpn18	1.77268e-69	0.340312	0.952	0.864	2.89177e-65	4
	Grap	1.99014e-68	0.293052	0.531	0.215	3.24652e-64	4
	B3gnt5	2.71704e-68	0.297117	0.549	0.221	4.43231e-64	4
	Atf3	3.66684e-68	0.628014	0.74	0.463	5.98172e-64	4
	Rpl23a	6.22787e-67	0.317492	0.974	0.944	1.01595e-62	4
	Ppdpf	4.44094e-65	0.343477	0.697	0.357	7.24451e-61	4
	Rpl36al	8.717e-65	0.302483	0.992	0.957	1.422e-60	4
	Nme2	1.71838e-63	0.283738	0.562	0.249	2.8032e-59	4
	Rps27rt	1.51435e-62	0.354103	0.778	0.471	2.47035e-58	4
	Serp1	2.9643e-61	0.33961	0.923	0.713	4.83567e-57	4
	Psmd14	1.00479e-60	0.317557	0.559	0.263	1.63911e-56	4
	Calm1	4.97407e-60	0.314493	0.987	0.983	8.1142e-56	4
	Dok3	7.37467e-60	0.254264	0.464	0.183	1.20303e-55	4
	Gimap1	1.0823e-59	0.309112	0.759	0.395	1.76555e-55	4
	Asph	2.80142e-59	0.288783	0.401	0.148	4.56995e-55	4
	Smim14	5.60915e-59	0.350079	0.788	0.465	9.15021e-55	4
	Grk6	7.17669e-59	0.290018	0.644	0.316	1.17073e-54	4
	Snhg12	6.55306e-58	0.25204	0.536	0.233	1.069e-53	4
	Ptp4a3	2.46255e-57	0.311117	0.644	0.32	4.01716e-53	4
	Gm10076	8.71708e-57	0.365384	0.801	0.566	1.42202e-52	4
	Swap70	1.80728e-56	0.274331	0.602	0.281	2.94821e-52	4
	Bola2	4.14392e-56	0.323165	0.75	0.449	6.75998e-52	4
	Zbtb20	6.72414e-55	0.376582	0.655	0.347	1.09691e-50	4
	Ncf4	1.15363e-52	0.257083	0.613	0.296	1.88192e-48	4
	Acp5	1.9482e-52	0.274648	0.657	0.339	3.1781e-48	4
	Snrnp25	5.47223e-52	0.251978	0.366	0.137	8.92684e-48	4
	Rps17	1.27305e-51	0.250606	0.981	0.955	2.07673e-47	4
	Rpl22l1	2.42056e-50	0.347319	0.949	0.907	3.94866e-46	4
	Ifi27l2a	2.95648e-50	0.266106	0.95	0.796	4.8229e-46	4
	Tsc22d3	5.79389e-48	0.411978	0.896	0.703	9.45157e-44	4
	Camk2d	5.22806e-47	0.252919	0.629	0.324	8.52854e-43	4
	Ccnd2	7.20693e-43	0.264306	0.605	0.303	1.17567e-38	4
	Nol7	2.59512e-42	0.272747	0.852	0.68	4.23341e-38	4
	Erp29	9.66205e-41	0.284589	0.886	0.726	1.57617e-36	4
	Mrpl52	2.47313e-40	0.30464	0.846	0.734	4.03442e-36	4
	Nsa2	5.55412e-40	0.271604	0.931	0.866	9.06043e-36	4
	Arhgap15	6.24054e-39	0.273629	0.743	0.49	1.01802e-34	4
	Foxp1	3.11782e-38	0.262336	0.891	0.71	5.0861e-34	4
	D10Wsu102e	1.83133e-31	0.312136	0.348	0.167	2.98745e-27	4
	Sec11c	6.3874e-22	0.276176	0.833	0.709	1.04198e-17	4
	Cd8b1	8.17382e-275	1.28851	0.99	0.386	1.3334e-270	5
	Mier1	1.42395e-274	1.46672	0.998	0.642	2.32289e-270	5
	Ccr9	4.34883e-246	1.20014	0.812	0.27	7.09424e-242	5
	Cd3d	1.01755e-241	0.995609	0.984	0.382	1.65992e-237	5
	Satb1	5.36476e-231	1.10441	0.998	0.651	8.75153e-227	5
	Cd3g	4.31135e-198	0.773977	0.997	0.418	7.03311e-194	5
	Txk	1.42029e-181	1.02164	0.754	0.309	2.31693e-177	5
	Cd3e	2.29227e-175	0.949409	0.769	0.309	3.73938e-171	5
	Rhoh	3.8736e-172	0.937681	0.997	0.597	6.319e-168	5
	Thy1	7.35936e-170	0.828655	0.89	0.379	1.20053e-165	5
	Lck	6.51877e-169	0.886083	0.871	0.409	1.06341e-164	5
	Cd8a	3.74705e-166	0.919266	0.765	0.29	6.11256e-162	5
	Cd4	7.94016e-162	0.891874	0.6	0.191	1.29528e-157	5
	Myb	8.18514e-158	0.969367	0.735	0.317	1.33524e-153	5
	Cd28	5.20634e-143	0.908119	0.641	0.254	8.4931e-139	5
	Themis	3.46831e-138	0.838614	0.623	0.244	5.65785e-134	5
	Trbc1	3.88584e-130	0.880103	0.998	0.533	6.33897e-126	5
	Ogt	2.9066e-129	0.669688	0.935	0.542	4.74154e-125	5
	Cd27	1.80274e-125	0.954531	0.652	0.311	2.94081e-121	5
	Xist	1.15151e-123	0.788659	0.998	0.951	1.87846e-119	5
	Malat1	3.03714e-122	0.499958	1	0.999	4.95448e-118	5
	mt-Atp6	2.10319e-113	0.483779	1	0.999	3.43093e-109	5
	Trbc2	1.24161e-112	0.617328	1	0.645	2.02544e-108	5
	Ptprc	6.27647e-111	0.604029	1	0.917	1.02388e-106	5
	Rsrp1	2.50228e-107	0.64882	0.997	0.695	4.08197e-103	5
	Son	5.20223e-107	0.551542	1	0.946	8.4864e-103	5
	Fyb	9.05564e-100	0.532451	0.981	0.544	1.47725e-95	5
	mt-Cytb	1.90658e-98	0.492748	1	0.997	3.11021e-94	5
	Snrnp70	1.7222e-95	0.602001	0.992	0.713	2.80943e-91	5
	mt-Nd4	1.2356e-91	0.478466	1	0.997	2.01563e-87	5
	Tcf7	2.04054e-91	0.345974	0.929	0.403	3.32873e-87	5
	Selplg	8.31713e-89	0.623612	0.994	0.727	1.35677e-84	5
	Tespa1	8.48615e-89	0.744704	0.594	0.329	1.38435e-84	5
	Ssbp2	3.30784e-87	0.728498	0.54	0.26	5.39608e-83	5
	Arglu1	8.2771e-87	0.510168	0.976	0.627	1.35024e-82	5
	Sox4	1.18518e-86	0.731588	0.61	0.299	1.93338e-82	5
	mt-Co2	1.26847e-86	0.391535	1	0.999	2.06926e-82	5
	Cbl	3.35259e-85	0.501291	0.896	0.532	5.46908e-81	5
	Ccnd3	6.18696e-84	0.546621	0.994	0.652	1.00928e-79	5
	Rbm39	3.82755e-83	0.488492	1	0.972	6.24388e-79	5
	Lat	1.77171e-82	0.563343	0.739	0.389	2.89018e-78	5
	Bcl2l11	2.66872e-82	0.806717	0.608	0.365	4.35348e-78	5
	Rag1	1.57838e-78	0.734737	0.579	0.278	2.5748e-74	5
	Ttc14	2.30985e-78	0.469018	0.96	0.583	3.76806e-74	5
	Taf1d	3.34472e-78	0.445782	0.943	0.55	5.45625e-74	5
	Tnrc6b	1.017e-77	0.581856	0.856	0.533	1.65903e-73	5
	mt-Co3	1.19671e-74	0.383459	1	0.998	1.95219e-70	5
	Arpp21	8.53394e-72	0.648702	0.579	0.294	1.39214e-67	5
	Itk	1.52877e-70	0.553579	0.49	0.226	2.49388e-66	5
	Arhgap45	1.37348e-69	0.474474	0.99	0.706	2.24056e-65	5
	Nipbl	8.24128e-69	0.430844	0.955	0.581	1.3444e-64	5
	Pnisr	3.73519e-66	0.436427	0.982	0.639	6.09322e-62	5
	Tra2a	2.0484e-65	0.478506	0.995	0.735	3.34156e-61	5
	Bptf	7.18906e-65	0.40412	0.966	0.596	1.17275e-60	5
	mt-Co1	1.76061e-64	0.398795	1	0.999	2.87209e-60	5
	Trac	4.74834e-63	0.632769	0.424	0.183	7.74597e-59	5
	Rnf157	5.05773e-63	0.713825	0.466	0.237	8.25067e-59	5
	Arhgef1	1.17754e-62	0.386736	0.966	0.616	1.92091e-58	5
	Prrc2c	1.70672e-62	0.508764	0.998	0.803	2.78417e-58	5
	Atrx	6.39354e-62	0.44031	0.985	0.64	1.04298e-57	5
	Sfpq	9.8707e-62	0.444563	0.994	0.734	1.61021e-57	5
	Celf2	7.95943e-61	0.455587	0.977	0.662	1.29842e-56	5
	Tacc1	2.61923e-60	0.392016	0.951	0.59	4.27275e-56	5
	Bcl11b	6.85057e-60	0.605039	0.589	0.334	1.11753e-55	5
	Srsf11	3.82838e-59	0.414011	0.985	0.677	6.24523e-55	5
	Prpf38b	7.60116e-59	0.392293	0.94	0.581	1.23998e-54	5
	Pnn	1.96711e-58	0.381912	0.883	0.525	3.20895e-54	5
	Bclaf1	2.26439e-58	0.426681	0.982	0.664	3.69389e-54	5
	Tctex1d1	5.36375e-56	0.537841	0.343	0.136	8.74989e-52	5
	Camk4	7.54891e-56	0.606487	0.427	0.206	1.23145e-51	5
	Metap2	3.72434e-55	0.354015	0.958	0.584	6.07552e-51	5
	Neat1	1.47277e-54	0.3101	0.994	0.625	2.40253e-50	5
	Fus	5.49337e-54	0.425905	0.998	0.754	8.96133e-50	5
	Gimap6	1.97906e-52	0.373027	0.964	0.568	3.22844e-48	5
	Nktr	2.00736e-52	0.355034	0.974	0.633	3.2746e-48	5
	Prpf4b	8.95873e-51	0.366123	0.901	0.56	1.46144e-46	5
	Ifngr1	1.49071e-50	0.398699	0.995	0.708	2.4318e-46	5
	Ddx17	2.87451e-50	0.415717	0.761	0.514	4.68919e-46	5
	Sec62	1.30607e-49	0.379054	0.984	0.702	2.13058e-45	5
	mt-Nd4l	1.35595e-49	0.364221	0.998	0.906	2.21196e-45	5
	Aqp11	2.53151e-47	0.571618	0.429	0.221	4.12965e-43	5
	Clk1	5.9459e-47	0.386013	1	0.773	9.69955e-43	5
	mt-Atp8	1.16492e-46	0.305789	0.916	0.563	1.90034e-42	5
	Dnajc3	1.19059e-45	0.526975	0.644	0.464	1.94221e-41	5
	Slc38a2	1.19915e-45	0.369169	0.994	0.696	1.95617e-41	5
	Tmed9	2.65297e-45	0.319035	0.963	0.644	4.32779e-41	5
	Endou	4.75433e-45	0.558553	0.482	0.27	7.75574e-41	5
	Slc7a11	4.53578e-43	0.5371	0.392	0.191	7.39921e-39	5
	Itpkb	1.27475e-42	0.615637	0.549	0.424	2.07951e-38	5
	Rsrc2	2.56933e-42	0.297584	0.921	0.585	4.19134e-38	5
	Luc7l2	4.07196e-42	0.385517	0.997	0.817	6.64259e-38	5
	Mbnl1	2.61988e-40	0.389002	1	0.858	4.2738e-36	5
	Rbm25	8.51066e-40	0.369159	0.997	0.748	1.38834e-35	5
	Ncor1	6.59096e-38	0.325778	0.995	0.715	1.07518e-33	5
	Abcc5	6.97613e-37	0.57203	0.359	0.192	1.13802e-32	5
	Rnf145	2.60709e-36	0.526036	0.396	0.24	4.25294e-32	5
	Zfp644	1.2633e-35	0.52081	0.557	0.459	2.06082e-31	5
	Ptprcap	1.96094e-34	0.373408	0.998	0.776	3.19888e-30	5
	Cdkn1b	7.98643e-34	0.421438	0.649	0.484	1.30283e-29	5
	Tmem50a	9.60498e-34	0.274389	0.971	0.646	1.56686e-29	5
	Csnk1a1	1.23337e-33	0.27035	0.96	0.651	2.012e-29	5
	Chd2	1.51373e-33	0.531276	0.544	0.449	2.46934e-29	5
	Nav2	4.67319e-33	0.408186	0.264	0.117	7.62338e-29	5
	Ramp1	9.15314e-33	0.424615	0.591	0.409	1.49315e-28	5
	Gm47283	2.18235e-32	0.283479	0.987	0.69	3.56008e-28	5
	Laptm5	3.7796e-32	0.273517	1	0.864	6.16566e-28	5
	Atl2	4.80863e-32	0.448291	0.34	0.189	7.84432e-28	5
	Sf3b1	6.15975e-32	0.334767	0.998	0.789	1.00484e-27	5
	Ccnl1	2.57407e-31	0.284867	0.992	0.704	4.19908e-27	5
	Saraf	3.78528e-31	0.48935	0.516	0.422	6.17493e-27	5
	Cd247	1.10779e-29	0.454438	0.406	0.259	1.80715e-25	5
	Tra2b	2.33034e-29	0.360058	0.998	0.814	3.80148e-25	5
	Ythdc1	3.11731e-29	0.319271	0.714	0.522	5.08527e-25	5
	Rab14	1.07169e-28	0.289745	0.775	0.544	1.74825e-24	5
	Ly6e	3.20367e-28	0.256927	0.998	0.937	5.22614e-24	5
	Nsg2	4.0276e-28	0.378366	0.293	0.149	6.57022e-24	5
	Ccpg1	1.0234e-27	0.427522	0.319	0.182	1.66948e-23	5
	Hdac7	2.17918e-27	0.4581	0.403	0.273	3.55489e-23	5
	Nabp1	2.91553e-27	0.480635	0.46	0.339	4.7561e-23	5
	Kif5b	3.95073e-27	0.292477	0.743	0.537	6.44483e-23	5
	Utp14b	6.56051e-26	0.41332	0.296	0.161	1.07022e-21	5
	Pdcd4	1.66388e-24	0.262895	0.99	0.721	2.71429e-20	5
	Arhgap31	4.92102e-24	0.478059	0.409	0.297	8.02765e-20	5
	Trat1	1.72105e-23	0.410654	0.294	0.167	2.80755e-19	5
	Tia1	2.96197e-23	0.452051	0.453	0.363	4.83187e-19	5
	Ankrd11	5.71655e-23	0.27695	0.985	0.722	9.32542e-19	5
	Atp1a1	1.61028e-21	0.259537	0.659	0.482	2.62685e-17	5
	Rcsd1	2.13405e-21	0.481265	0.482	0.436	3.48127e-17	5
	Ly6d	5.96608e-21	0.286653	0.994	0.725	9.73246e-17	5
	Tcf12	6.56633e-21	0.459064	0.456	0.386	1.07117e-16	5
	Mirt1	2.25281e-20	0.483495	0.405	0.305	3.67501e-16	5
	Hnrnpa2b1	7.21702e-20	0.27778	1	0.871	1.17731e-15	5
	Snx18	1.98589e-19	0.430804	0.408	0.318	3.23959e-15	5
	Plcxd2	8.90982e-19	0.372756	0.272	0.163	1.45346e-14	5
	Plxnd1	1.15096e-18	0.342958	0.303	0.191	1.87757e-14	5
	Ilvbl	4.12432e-18	0.350956	0.299	0.196	6.72801e-14	5
	Znrf1	1.39296e-17	0.387496	0.395	0.312	2.27234e-13	5
	Spint2	2.81859e-17	0.38305	0.434	0.347	4.59796e-13	5
	Nrip1	5.82144e-17	0.394213	0.463	0.394	9.49652e-13	5
	Itpr2	1.23526e-16	0.463269	0.443	0.394	2.01507e-12	5
	Zfp266	5.82979e-16	0.360816	0.324	0.235	9.51014e-12	5
	4932438A13Rik	1.73727e-15	0.418455	0.413	0.359	2.83401e-11	5
	Lman2l	4.06513e-14	0.325307	0.286	0.199	6.63145e-10	5
	Edem1	1.62711e-13	0.415864	0.408	0.363	2.6543e-09	5
	Phf3	7.5126e-13	0.351736	0.506	0.485	1.22553e-08	5
	Trp53inp1	1.13943e-12	0.363536	0.35	0.28	1.85874e-08	5
	Jakmip1	1.45404e-11	0.36004	0.311	0.242	2.37197e-07	5
	Birc6	1.92879e-11	0.302306	0.555	0.498	3.14643e-07	5
	Dclre1c	2.38532e-11	0.330902	0.267	0.193	3.89118e-07	5
	Pan3	1.80327e-10	0.367004	0.377	0.344	2.94168e-06	5
	Hnrnph1	1.76049e-09	0.25153	0.545	0.495	2.87189e-05	5
	Pcsk7	3.57743e-09	0.266677	0.262	0.201	5.83587e-05	5
	Mxd4	4.61803e-09	0.357082	0.367	0.338	7.53339e-05	5
	4833420G17Rik	6.78413e-09	0.31781	0.322	0.28	0.00011067	5
	Cux1	1.07402e-08	0.271524	0.484	0.452	0.000175205	5
	Kcnn4	1.36039e-08	0.284723	0.298	0.242	0.00022192	5
	Hnrnpl	1.85388e-08	0.346781	0.442	0.461	0.000302424	5
	Xrcc6	1.23352e-07	0.253615	0.293	0.236	0.00201224	5
	Slc25a36	1.49753e-07	0.297072	0.322	0.287	0.00244292	5
	Hjurp	2.10508e-07	0.257971	0.29	0.24	0.00343402	5
	Krit1	3.14817e-07	0.341561	0.403	0.416	0.00513561	5
	Lbr	3.95349e-07	0.271733	0.437	0.437	0.00644932	5
	Pik3ip1	4.58134e-07	0.319012	0.298	0.259	0.00747354	5
	Stmn1	0	2.41081	1	0.403	0	6
	Pclaf	0	2.09766	0.957	0.096	0	6
	Top2a	0	1.92119	0.924	0.135	0	6
	Dut	0	1.90565	0.963	0.208	0	6
	Hmgn2	0	1.88476	1	0.389	0	6
	Hist1h1b	0	1.86795	0.886	0.187	0	6
	Ube2c	0	1.8296	0.777	0.08	0	6
	Birc5	0	1.72812	0.932	0.081	0	6
	Mki67	0	1.67349	0.946	0.101	0	6
	H2afx	0	1.66679	0.884	0.196	0	6
	Anp32e	0	1.56392	0.996	0.401	0	6
	Nusap1	0	1.52065	0.793	0.059	0	6
	Rrm2	0	1.51701	0.88	0.065	0	6
	Ezh2	0	1.36221	0.963	0.168	0	6
	Cenpf	0	1.31573	0.744	0.072	0	6
	Tmpo	0	1.27507	0.967	0.243	0	6
	Tyms	0	1.22829	0.86	0.078	0	6
	Cks2	0	1.22676	0.849	0.186	0	6
	Cdca8	0	1.20566	0.824	0.063	0	6
	Lockd	0	1.1724	0.88	0.084	0	6
	Cdca7	0	1.16571	0.866	0.13	0	6
	Cks1b	0	1.16566	0.907	0.083	0	6
	Spc24	0	1.14605	0.878	0.06	0	6
	Kif11	0	1.13834	0.791	0.049	0	6
	Tpx2	0	1.13093	0.75	0.052	0	6
	Prc1	0	1.11183	0.785	0.072	0	6
	Gmnn	0	1.1044	0.89	0.118	0	6
	Smc2	0	1.10286	0.895	0.127	0	6
	Selenoh	0	1.09798	0.971	0.27	0	6
	Dnmt1	0	1.08446	0.897	0.185	0	6
	Cdca3	0	1.03243	0.787	0.044	0	6
	Uhrf1	0	1.03208	0.837	0.077	0	6
	Cdk1	0	1.02628	0.787	0.042	0	6
	Ccna2	0	1.01931	0.785	0.044	0	6
	Mns1	0	0.996285	0.845	0.111	0	6
	Lig1	0	0.982173	0.812	0.09	0	6
	Ccnb2	0	0.973592	0.702	0.049	0	6
	Cenpe	0	0.957448	0.684	0.06	0	6
	Clspn	0	0.955367	0.773	0.058	0	6
	Tipin	0	0.934503	0.841	0.103	0	6
	Rrm1	0	0.932497	0.841	0.104	0	6
	Mcm7	0	0.926774	0.837	0.117	0	6
	Fbxo5	0	0.914575	0.742	0.049	0	6
	Spc25	0	0.907501	0.717	0.044	0	6
	Usp1	0	0.893331	0.87	0.176	0	6
	Mcm3	0	0.889544	0.793	0.118	0	6
	Lsm2	0	0.861664	0.87	0.19	0	6
	Hmmr	0	0.840215	0.601	0.035	0	6
	Hells	0	0.83741	0.674	0.068	0	6
	Kif15	0	0.833467	0.76	0.052	0	6
	Ccdc34	0	0.815787	0.8	0.089	0	6
	Rfc4	0	0.789279	0.758	0.071	0	6
	Mcm5	0	0.780393	0.736	0.084	0	6
	Cenpw	0	0.773894	0.806	0.076	0	6
	Knl1	0	0.765938	0.694	0.053	0	6
	Cdc20	0	0.759619	0.556	0.032	0	6
	Incenp	0	0.742899	0.657	0.063	0	6
	Prim1	0	0.73172	0.719	0.065	0	6
	Hmgb3	0	0.73158	0.707	0.052	0	6
	Pbk	0	0.731189	0.653	0.022	0	6
	Bub1b	0	0.720401	0.655	0.035	0	6
	Tacc3	0	0.696	0.659	0.047	0	6
	Hist1h2ab	0	0.694717	0.539	0.032	0	6
	Ccnb1	0	0.684202	0.531	0.03	0	6
	Ncapd2	0	0.681448	0.674	0.063	0	6
	Esco2	0	0.678016	0.583	0.029	0	6
	Cmc2	0	0.669642	0.76	0.105	0	6
	Racgap1	0	0.655837	0.665	0.087	0	6
	Sgo1	0	0.650936	0.628	0.028	0	6
	Aurkb	0	0.648245	0.603	0.035	0	6
	Dtl	0	0.626688	0.671	0.08	0	6
	Rnaseh2b	0	0.617608	0.719	0.09	0	6
	Tk1	0	0.607415	0.601	0.027	0	6
	Mxd3	0	0.603396	0.539	0.019	0	6
	Asf1b	0	0.602718	0.634	0.034	0	6
	Orc6	0	0.598559	0.643	0.067	0	6
	1500009L16Rik	0	0.596913	0.537	0.042	0	6
	Syce2	0	0.589383	0.595	0.048	0	6
	Ncapg2	0	0.581845	0.647	0.063	0	6
	Nt5dc2	0	0.574601	0.626	0.059	0	6
	Hist1h3c	0	0.563834	0.479	0.016	0	6
	Kif22	0	0.563505	0.554	0.027	0	6
	Rad51ap1	0	0.562722	0.593	0.026	0	6
	Cenpk	0	0.562151	0.649	0.065	0	6
	Dhfr	0	0.560297	0.556	0.037	0	6
	Dlgap5	0	0.551981	0.504	0.034	0	6
	Ncapg	0	0.530855	0.539	0.023	0	6
	Mad2l1	0	0.521548	0.585	0.048	0	6
	Ckap2l	0	0.520552	0.523	0.032	0	6
	Cenpm	0	0.518013	0.537	0.021	0	6
	Plk1	0	0.516381	0.463	0.016	0	6
	Ndc80	0	0.50048	0.519	0.036	0	6
	Rad51	0	0.500097	0.529	0.024	0	6
	Mis18bp1	0	0.488171	0.488	0.03	0	6
	Shcbp1	0	0.487468	0.519	0.025	0	6
	Kif4	0	0.481404	0.452	0.022	0	6
	Cdca5	0	0.47673	0.506	0.012	0	6
	Cenph	0	0.475541	0.521	0.022	0	6
	Hist1h2bj	0	0.471014	0.483	0.037	0	6
	Pola1	0	0.470398	0.49	0.041	0	6
	Cenpp	0	0.463409	0.506	0.023	0	6
	Bub1	0	0.455708	0.463	0.026	0	6
	Chaf1a	0	0.45407	0.481	0.027	0	6
	Ncaph	0	0.453232	0.463	0.021	0	6
	Sgo2a	0	0.44935	0.45	0.02	0	6
	Aurka	0	0.436628	0.434	0.019	0	6
	Gins2	0	0.434676	0.465	0.03	0	6
	Cdc45	0	0.429385	0.477	0.025	0	6
	Ccne2	0	0.429144	0.388	0.02	0	6
	Ska1	0	0.427197	0.442	0.016	0	6
	E2f8	0	0.412201	0.43	0.026	0	6
	Ect2	0	0.41093	0.411	0.019	0	6
	Cdc6	0	0.404131	0.395	0.022	0	6
	Neil3	0	0.384132	0.419	0.022	0	6
	Hist1h2af	0	0.376436	0.355	0.014	0	6
	Spag5	0	0.375784	0.415	0.023	0	6
	Nuf2	0	0.359456	0.386	0.021	0	6
	Fignl1	0	0.350391	0.386	0.019	0	6
	Hist1h3b	0	0.346226	0.343	0.008	0	6
	Kif2c	0	0.310019	0.337	0.012	0	6
	Rpa3	2.60929e-306	0.78404	0.862	0.183	4.25654e-302	6
	Dtymk	5.04869e-306	0.874025	0.853	0.183	8.23593e-302	6
	Hist1h4d	6.04408e-306	1.20879	0.822	0.181	9.8597e-302	6
	Hmgn5	2.53426e-304	0.746186	0.775	0.137	4.13414e-300	6
	Hist1h2ae	1.59189e-303	1.76516	0.884	0.221	2.59686e-299	6
	Lmnb1	3.46555e-303	0.975921	0.924	0.225	5.65335e-299	6
	Alyref	1.28993e-302	1.05552	0.936	0.293	2.10427e-298	6
	Cdkn3	8.84426e-302	0.374405	0.349	0.017	1.44276e-297	6
	Atad2	2.26274e-300	1.04962	0.855	0.188	3.69121e-296	6
	Ccnf	9.60541e-298	0.367426	0.37	0.02	1.56693e-293	6
	Cit	2.31113e-297	0.37171	0.436	0.032	3.77014e-293	6
	Hist1h1a	5.69235e-297	0.559237	0.545	0.057	9.28593e-293	6
	Tcf19	9.75809e-297	0.331273	0.333	0.015	1.59184e-292	6
	H2afv	7.23699e-294	1.52508	1	0.619	1.18057e-289	6
	Hirip3	1.28827e-292	0.547661	0.597	0.073	2.10156e-288	6
	Dntt	4.40862e-292	1.34427	0.944	0.27	7.19179e-288	6
	C330027C09Rik	4.93144e-291	0.384419	0.415	0.029	8.04465e-287	6
	Mcm6	6.98761e-291	0.879875	0.75	0.142	1.13989e-286	6
	Tfdp1	2.97007e-290	0.60612	0.665	0.098	4.84508e-286	6
	Snrpd1	3.51642e-290	1.19999	0.983	0.412	5.73634e-286	6
	Aspm	2.82177e-289	0.482071	0.43	0.032	4.60316e-285	6
	Rfc5	3.43896e-289	0.445609	0.55	0.06	5.60997e-285	6
	Hist1h2ag	2.5563e-287	0.319735	0.339	0.017	4.1701e-283	6
	Anp32b	3.4281e-287	1.37557	0.998	0.783	5.59226e-283	6
	Cbx5	1.42856e-286	0.818317	0.829	0.178	2.33041e-282	6
	Ptma	2.78661e-286	1.45803	1	0.993	4.5458e-282	6
	Hmgb1	5.03836e-286	1.64124	1	0.951	8.21907e-282	6
	Tuba1b	6.07133e-286	1.72093	0.975	0.488	9.90417e-282	6
	Cenps	8.55522e-286	0.37881	0.413	0.03	1.39561e-281	6
	Hmgb2	2.38915e-284	1.82019	1	0.911	3.89743e-280	6
	Nsd2	4.50622e-284	0.789102	0.839	0.178	7.35099e-280	6
	Dnajc9	3.05201e-283	0.849996	0.872	0.22	4.97874e-279	6
	Kif20a	9.43489e-282	0.270063	0.283	0.01	1.53911e-277	6
	Knstrn	2.4599e-280	0.480434	0.51	0.053	4.01284e-276	6
	Smc4	1.02736e-279	1.23502	0.977	0.369	1.67594e-275	6
	H2afz	1.34743e-278	1.59526	1	0.897	2.19807e-274	6
	Ran	1.36051e-277	1.32023	0.994	0.715	2.21939e-273	6
	Hist1h2an	3.60174e-276	0.485629	0.452	0.04	5.87552e-272	6
	Tubb5	7.74017e-276	1.64498	0.998	0.761	1.26265e-271	6
	Dctpp1	1.10874e-274	0.866088	0.748	0.148	1.80868e-270	6
	Trdc	2.77665e-273	0.829106	0.618	0.086	4.52955e-269	6
	Pcna	1.53665e-271	1.25408	0.868	0.25	2.50674e-267	6
	Diaph3	3.94224e-271	0.422439	0.45	0.04	6.43097e-267	6
	Siva1	6.04039e-271	0.958802	0.841	0.219	9.85369e-267	6
	Ncapd3	1.21423e-270	0.637904	0.713	0.12	1.98077e-266	6
	Foxm1	1.26376e-270	0.318596	0.341	0.019	2.06158e-266	6
	E2f2	6.2948e-270	0.643835	0.7	0.117	1.02687e-265	6
	Haus4	1.20194e-269	0.492105	0.597	0.081	1.96072e-265	6
	Dnph1	1.65154e-268	0.296887	0.329	0.017	2.69415e-264	6
	Arhgap19	3.19684e-268	0.367181	0.374	0.025	5.215e-264	6
	Depdc1a	7.80155e-268	0.328686	0.333	0.018	1.27267e-263	6
	Hpf1	8.45307e-267	0.835412	0.86	0.225	1.37895e-262	6
	Mcm2	1.71055e-264	0.581264	0.614	0.09	2.79042e-260	6
	Wdr76	8.73474e-264	0.472359	0.556	0.068	1.4249e-259	6
	Mybl2	5.88187e-259	0.260478	0.281	0.012	9.5951e-255	6
	Pimreg	5.37946e-258	0.313691	0.275	0.011	8.77551e-254	6
	Kif18b	7.33975e-258	0.257557	0.273	0.011	1.19733e-253	6
	Plk4	4.02875e-257	0.521346	0.624	0.092	6.5721e-253	6
	Psip1	4.81049e-257	0.873948	0.921	0.282	7.84735e-253	6
	Ppia	6.84463e-257	1.04412	1	0.993	1.11656e-252	6
	Nasp	1.20732e-255	0.909562	0.872	0.243	1.96949e-251	6
	Cbx3	2.78393e-255	1.14124	0.988	0.549	4.54142e-251	6
	Dek	1.58753e-252	1.28874	0.977	0.58	2.58974e-248	6
	Mrpl18	3.88674e-252	0.810175	0.924	0.294	6.34044e-248	6
	Sh2d1a	1.59992e-251	0.951385	0.814	0.191	2.60996e-247	6
	Cbx1	1.17176e-248	0.914898	0.957	0.347	1.91149e-244	6
	Ckap2	2.62474e-248	0.357305	0.37	0.027	4.28173e-244	6
	Kif20b	5.10835e-248	0.475977	0.494	0.057	8.33325e-244	6
	Lsm3	4.68431e-247	0.750791	0.907	0.274	7.64151e-243	6
	Ube2s	1.34768e-246	1.3677	0.994	0.661	2.19847e-242	6
	Brca1	1.91973e-246	0.305485	0.341	0.022	3.13166e-242	6
	Cep55	4.33944e-246	0.300133	0.322	0.019	7.07892e-242	6
	Mcm10	2.89329e-245	0.257631	0.289	0.014	4.71983e-241	6
	Cdkn2c	5.43283e-245	0.539373	0.574	0.082	8.86258e-241	6
	Erh	5.19216e-244	0.991533	0.948	0.387	8.46997e-240	6
	Nek2	8.49503e-244	0.266777	0.277	0.012	1.38579e-239	6
	Nucks1	1.96191e-241	1.13979	0.983	0.52	3.20047e-237	6
	Hdgf	5.54371e-241	0.87275	0.944	0.331	9.04345e-237	6
	Mrpl58	1.08709e-240	0.724314	0.847	0.222	1.77337e-236	6
	Galk1	2.15706e-238	0.476705	0.585	0.088	3.5188e-234	6
	Ska2	1.03913e-237	0.324036	0.341	0.024	1.69514e-233	6
	Atad5	1.45451e-237	0.379472	0.452	0.047	2.37275e-233	6
	Desi1	2.28405e-236	0.725758	0.851	0.215	3.72596e-232	6
	Lsm6	3.49515e-236	0.803148	0.942	0.342	5.70164e-232	6
	Ppih	6.18185e-236	0.532063	0.69	0.132	1.00845e-231	6
	Dgkeos	1.54143e-233	0.644739	0.678	0.123	2.51453e-229	6
	Snrpe	1.7866e-233	0.855573	0.994	0.856	2.91448e-229	6
	Hnrnpab	1.37657e-231	0.934489	0.983	0.494	2.2456e-227	6
	Rpa2	3.7527e-230	0.588203	0.651	0.12	6.12178e-226	6
	Sumo2	3.03201e-227	0.87551	0.996	0.869	4.94612e-223	6
	Tcf7	9.56584e-227	1.19678	0.95	0.412	1.56047e-222	6
	Rcc1	6.60557e-226	0.341145	0.407	0.04	1.07757e-221	6
	Fxn	1.86845e-225	0.426857	0.519	0.071	3.048e-221	6
	Pole	6.11538e-225	0.298198	0.333	0.024	9.97602e-221	6
	Cenpn	4.36026e-224	0.270604	0.306	0.019	7.11289e-220	6
	2610318N02Rik	1.03844e-222	0.261541	0.277	0.015	1.69401e-218	6
	Banf1	1.22979e-221	0.764652	0.87	0.272	2.00616e-217	6
	Fen1	2.13913e-221	0.441191	0.57	0.088	3.48956e-217	6
	Cdca2	3.88326e-221	0.282473	0.306	0.02	6.33476e-217	6
	Trip13	3.89778e-221	0.260486	0.287	0.017	6.35845e-217	6
	Mcm4	2.68718e-220	0.565512	0.616	0.11	4.3836e-216	6
	Ranbp1	2.89922e-220	1.10913	0.93	0.424	4.7295e-216	6
	Ada	3.94199e-220	0.409094	0.5	0.067	6.43057e-216	6
	Kpna2	6.26853e-220	0.562684	0.514	0.074	1.02259e-215	6
	Lsm5	2.57351e-219	0.771902	0.909	0.325	4.19817e-215	6
	Ckap5	4.40541e-219	0.619204	0.632	0.12	7.18654e-215	6
	Ddx39	4.2594e-218	0.662519	0.81	0.217	6.94835e-214	6
	Xrcc6	5.94202e-218	0.69444	0.814	0.202	9.69322e-214	6
	Rfc3	6.37822e-218	0.525644	0.583	0.097	1.04048e-213	6
	Rbbp7	9.0238e-218	0.742451	0.829	0.242	1.47205e-213	6
	Smc1a	2.11083e-217	0.810208	0.944	0.352	3.44339e-213	6
	Kifc1	1.2249e-215	0.294927	0.326	0.025	1.99818e-211	6
	1700097N02Rik	4.18476e-215	0.481856	0.537	0.08	6.8266e-211	6
	Kif23	5.69349e-214	0.491387	0.568	0.09	9.28778e-210	6
	Smarcc1	9.62017e-214	0.708391	0.82	0.225	1.56934e-209	6
	Bex3	1.21748e-212	0.577512	0.767	0.18	1.98608e-208	6
	Psmc3ip	1.29401e-212	0.294655	0.351	0.03	2.11092e-208	6
	Ccdc18	2.40742e-211	0.330192	0.366	0.033	3.92723e-207	6
	Rmi2	7.4098e-211	0.364282	0.465	0.058	1.20876e-206	6
	Timeless	2.06382e-209	0.327641	0.368	0.035	3.36672e-205	6
	Tubg1	2.42399e-209	0.352921	0.442	0.053	3.95426e-205	6
	Slbp	3.54649e-209	0.980638	0.851	0.297	5.78539e-205	6
	Supt16	4.43844e-209	0.784286	0.928	0.348	7.24042e-205	6
	Hist1h4h	1.47055e-208	0.481797	0.517	0.078	2.39891e-204	6
	Exosc8	2.34281e-207	0.608617	0.785	0.209	3.82182e-203	6
	Ube2t	3.08629e-207	0.422136	0.512	0.074	5.03467e-203	6
	Topbp1	5.00776e-207	0.577766	0.756	0.179	8.16916e-203	6
	Hmga1	7.05773e-207	0.403097	0.521	0.078	1.15133e-202	6
	Snrpg	1.24231e-206	0.784436	1	0.916	2.02658e-202	6
	Mms22l	4.38824e-206	0.338998	0.413	0.046	7.15854e-202	6
	Cdk4	1.5232e-205	0.818666	0.806	0.244	2.48479e-201	6
	Chaf1b	1.60989e-205	0.35693	0.374	0.037	2.62621e-201	6
	Snrpf	2.16935e-205	0.881619	0.994	0.778	3.53886e-201	6
	Csrp1	9.12191e-205	0.557308	0.736	0.171	1.48806e-200	6
	Magoh	1.91443e-203	0.734726	0.903	0.33	3.12302e-199	6
	Smc3	2.11806e-203	0.760211	0.903	0.32	3.45519e-199	6
	Gapdh	1.70138e-202	0.866082	0.998	0.939	2.77547e-198	6
	Lrrc42	3.90692e-202	0.42171	0.535	0.085	6.37336e-198	6
	Phgdh	4.21952e-202	0.760411	0.773	0.205	6.8833e-198	6
	Ssna1	5.54556e-202	0.616278	0.82	0.236	9.04647e-198	6
	Hmgn1	1.76534e-201	0.830188	0.948	0.403	2.8798e-197	6
	Thoc7	2.97213e-201	0.74005	0.895	0.317	4.84843e-197	6
	Maz	3.34721e-201	0.724364	0.915	0.323	5.46031e-197	6
	Dbf4	2.32648e-200	0.49055	0.62	0.119	3.79518e-196	6
	Vdac1	1.22886e-199	0.706346	0.872	0.299	2.00464e-195	6
	Hist1h2ap	1.53979e-198	2.02497	0.963	0.673	2.51186e-194	6
	Ywhae	2.64892e-198	0.804299	0.981	0.672	4.32118e-194	6
	Hist2h2ac	8.20246e-198	0.458647	0.442	0.058	1.33807e-193	6
	Nudt21	7.77644e-197	0.655884	0.882	0.297	1.26857e-192	6
	Eif1ax	6.23751e-195	0.673725	0.857	0.286	1.01753e-190	6
	Anln	2.66907e-193	0.253881	0.287	0.021	4.35405e-189	6
	Nudt5	6.41019e-192	0.470177	0.64	0.135	1.04569e-187	6
	Atp5h	8.30472e-192	0.743047	0.996	0.935	1.35475e-187	6
	Tubb4b	1.3203e-191	1.09987	0.847	0.327	2.15381e-187	6
	Pa2g4	4.98014e-191	0.787092	0.833	0.277	8.1241e-187	6
	Ndufab1	6.33037e-191	0.755503	0.907	0.357	1.03267e-186	6
	Arhgap11a	8.3616e-191	0.375379	0.469	0.067	1.36403e-186	6
	Samd1	1.79379e-190	0.611675	0.667	0.153	2.9262e-186	6
	Rad21	2.62856e-190	0.706758	0.8	0.238	4.28798e-186	6
	Asf1a	4.12267e-190	0.479158	0.612	0.122	6.72531e-186	6
	Mrpl51	7.74652e-190	0.60395	0.808	0.243	1.26369e-185	6
	Atp5j	9.29148e-190	0.732356	0.996	0.828	1.51572e-185	6
	Ppp1r14b	2.50971e-189	0.978371	0.959	0.615	4.09409e-185	6
	Txn1	3.02492e-188	0.78124	0.998	0.775	4.93455e-184	6
	Ctcf	6.86786e-188	0.8619	0.952	0.451	1.12035e-183	6
	Lsm8	8.82456e-188	0.594444	0.808	0.242	1.43955e-183	6
	Phf5a	2.22026e-187	0.638537	0.866	0.297	3.62191e-183	6
	Spdl1	1.00148e-186	0.285813	0.316	0.028	1.63371e-182	6
	Anapc5	1.03466e-186	0.685852	0.909	0.335	1.68784e-182	6
	Rbbp4	1.84486e-185	0.74198	0.888	0.342	3.00952e-181	6
	Ap3s1	9.59316e-185	0.739145	0.824	0.265	1.56493e-180	6
	Srsf3	2.18558e-184	0.838507	0.994	0.844	3.56534e-180	6
	Srsf7	1.70235e-183	0.776102	0.884	0.351	2.77704e-179	6
	Atp5g3	2.22208e-183	0.762586	0.963	0.577	3.62488e-179	6
	Uchl5	3.0093e-183	0.559514	0.719	0.186	4.90908e-179	6
	Skap1	2.81815e-180	0.704724	0.897	0.298	4.59725e-176	6
	Psma6	1.47723e-179	0.653116	0.893	0.343	2.4098e-175	6
	Nup62	5.08039e-179	0.36341	0.455	0.068	8.28763e-175	6
	Nono	7.96384e-179	0.682918	0.926	0.383	1.29914e-174	6
	U2af1	9.86239e-179	0.721274	0.897	0.359	1.60885e-174	6
	Dpy30	3.81091e-178	0.535106	0.727	0.196	6.21673e-174	6
	Hnrnpa1	1.38792e-177	0.803653	0.981	0.718	2.26411e-173	6
	Hnrnpa3	1.79017e-177	0.816108	0.996	0.88	2.9203e-173	6
	Cdk2ap1	2.38745e-177	0.596283	0.783	0.237	3.89465e-173	6
	Hjurp	2.38384e-176	0.571187	0.777	0.208	3.88877e-172	6
	Hat1	2.51744e-176	0.499879	0.663	0.158	4.10671e-172	6
	Snu13	5.49512e-176	0.809751	0.955	0.61	8.9642e-172	6
	Nudc	4.88436e-174	0.740321	0.853	0.336	7.96785e-170	6
	Uqcr10	1.70447e-173	0.695901	0.979	0.68	2.7805e-169	6
	Atpif1	2.23599e-173	0.770654	0.973	0.64	3.64757e-169	6
	Ddah2	2.26771e-173	0.311983	0.347	0.039	3.69931e-169	6
	Cox7a2	2.46908e-173	0.672372	0.994	0.853	4.02781e-169	6
	Trbc2	4.19805e-173	1.26998	0.963	0.655	6.84828e-169	6
	Dynlt1f	4.6691e-173	0.499317	0.682	0.169	7.6167e-169	6
	Impa2	5.01612e-173	0.331106	0.434	0.063	8.18279e-169	6
	Cyb5a	9.21746e-173	0.918522	0.903	0.439	1.50364e-168	6
	Hnrnpu	1.08912e-172	0.76876	0.983	0.796	1.77668e-168	6
	Kmt5a	8.92834e-172	0.574742	0.762	0.222	1.45648e-167	6
	Ybx1	9.43854e-172	0.774458	0.994	0.936	1.53971e-167	6
	Cdc25a	1.36781e-171	0.313615	0.395	0.052	2.23131e-167	6
	Snrpa1	6.28503e-170	0.560217	0.733	0.211	1.02528e-165	6
	Nt5c3b	1.37131e-169	0.390135	0.533	0.099	2.23702e-165	6
	Snrpb	7.10934e-169	0.661302	0.975	0.729	1.15975e-164	6
	Nudcd2	1.0433e-168	0.435745	0.587	0.124	1.70194e-164	6
	Ube2e3	2.26e-167	0.529429	0.723	0.198	3.68675e-163	6
	Anp32a	6.72582e-167	0.686222	0.975	0.693	1.09718e-162	6
	Nudt1	3.69401e-165	0.330013	0.413	0.06	6.02603e-161	6
	Rgcc	6.13956e-165	0.723866	0.831	0.269	1.00155e-160	6
	Rbm3	2.69757e-164	0.680381	0.981	0.808	4.40054e-160	6
	Lsm4	2.96884e-164	0.717269	0.948	0.531	4.84306e-160	6
	Brca2	4.68913e-164	0.2826	0.312	0.032	7.64938e-160	6
	Hnrnpd	1.0703e-163	0.777193	0.932	0.559	1.74598e-159	6
	Nxt1	4.43242e-163	0.394181	0.517	0.099	7.2306e-159	6
	Ssrp1	7.072e-163	0.548497	0.775	0.24	1.15366e-158	6
	Hist1h4i	3.11573e-160	0.426505	0.576	0.124	5.0827e-156	6
	Elob	3.20621e-160	0.593508	0.994	0.899	5.2303e-156	6
	Pole3	4.77382e-160	0.376456	0.531	0.104	7.78754e-156	6
	Bcl7c	7.77234e-160	0.580085	0.808	0.28	1.2679e-155	6
	Cox5a	7.79222e-160	0.65871	0.981	0.79	1.27115e-155	6
	Hprt	1.11443e-159	0.596843	0.816	0.292	1.81796e-155	6
	Slc16a1	7.58177e-159	0.384574	0.506	0.092	1.23681e-154	6
	Them6	1.24659e-158	0.484728	0.63	0.151	2.03356e-154	6
	Atp5o.1	1.831e-158	0.652589	0.965	0.577	2.9869e-154	6
	Msh6	1.89105e-158	0.38387	0.508	0.096	3.08487e-154	6
	Hnrnpf	4.00335e-158	0.645695	0.994	0.879	6.53067e-154	6
	Ndufs6	5.07827e-158	0.614848	0.897	0.377	8.28418e-154	6
	Raly	7.81844e-158	0.634896	0.936	0.43	1.27542e-153	6
	Arpp21	3.25847e-157	0.704173	0.866	0.28	5.31554e-153	6
	Lat	2.44014e-156	0.735752	0.94	0.382	3.98061e-152	6
	Zfp367	3.81613e-156	0.276236	0.318	0.036	6.22525e-152	6
	Atp5j2	4.23585e-156	0.598495	0.996	0.9	6.90994e-152	6
	Thy1	8.27738e-156	0.746199	0.932	0.385	1.35029e-151	6
	Ndufa5	3.42243e-155	0.607464	0.868	0.349	5.58301e-151	6
	Rdx	5.80779e-155	0.590782	0.87	0.324	9.47425e-151	6
	Rangap1	6.93945e-155	0.43472	0.597	0.138	1.13203e-150	6
	Ppp1cc	7.75124e-155	0.607366	0.921	0.375	1.26446e-150	6
	Lyar	1.52912e-154	0.539345	0.622	0.159	2.49445e-150	6
	Nap1l1	1.56127e-154	0.724777	0.959	0.71	2.54689e-150	6
	Suz12	2.94562e-154	0.551604	0.762	0.241	4.80518e-150	6
	Msh2	3.02258e-154	0.396422	0.539	0.111	4.93074e-150	6
	Pin1	1.52636e-153	0.484149	0.711	0.205	2.48994e-149	6
	Trim28	3.16468e-153	0.504842	0.707	0.203	5.16255e-149	6
	Calm3	1.35735e-152	0.65839	0.959	0.548	2.21424e-148	6
	Abhd8	1.6721e-152	0.399896	0.543	0.114	2.7277e-148	6
	Endou	5.70373e-152	0.677596	0.806	0.252	9.30449e-148	6
	Fkbp5	9.08637e-152	0.554416	0.713	0.205	1.48226e-147	6
	Ldhb	2.18394e-151	0.593972	0.736	0.207	3.56266e-147	6
	Ndufs5	4.77553e-151	0.611176	0.946	0.519	7.79032e-147	6
	Ccne1	1.70109e-150	0.2574	0.262	0.024	2.77499e-146	6
	Nsmce4a	5.19384e-150	0.561881	0.851	0.325	8.47272e-146	6
	Eny2	1.2711e-149	0.534892	0.829	0.295	2.07355e-145	6
	Cacybp	8.54469e-149	0.625568	0.833	0.316	1.3939e-144	6
	Tceal9	1.82795e-148	0.450947	0.64	0.166	2.98193e-144	6
	Mrps36	3.26735e-148	0.512658	0.754	0.245	5.33003e-144	6
	Skp1a	3.8329e-148	0.575782	0.793	0.276	6.25261e-144	6
	Atp5k	5.37246e-148	0.615502	0.986	0.745	8.7641e-144	6
	Bub3	7.96321e-148	0.666846	0.8	0.301	1.29904e-143	6
	Nebl	1.73255e-147	0.432966	0.562	0.123	2.82631e-143	6
	Ndufc1	2.74643e-147	0.635155	0.928	0.459	4.48025e-143	6
	Rfc1	2.10705e-146	0.59415	0.736	0.242	3.43724e-142	6
	Bora	4.40847e-146	0.335194	0.419	0.069	7.19154e-142	6
	Cenpl	5.98357e-146	0.289679	0.339	0.045	9.761e-142	6
	Prmt1	7.23884e-146	0.566877	0.746	0.245	1.18087e-141	6
	Uba2	7.95416e-145	0.484838	0.713	0.215	1.29756e-140	6
	Elof1	1.25785e-144	0.481146	0.707	0.215	2.05193e-140	6
	Cdc7	1.27195e-144	0.281542	0.343	0.046	2.07493e-140	6
	Ndufa12	5.1841e-144	0.616186	0.808	0.319	8.45682e-140	6
	Swi5	4.95057e-142	0.608509	0.89	0.408	8.07587e-138	6
	Metrn	9.08061e-142	0.305637	0.378	0.058	1.48132e-137	6
	Pold3	1.21495e-141	0.392362	0.498	0.103	1.98194e-137	6
	Tex30	1.1235e-139	0.339405	0.494	0.1	1.83277e-135	6
	Tcof1	2.07598e-139	0.560945	0.802	0.294	3.38654e-135	6
	Emg1	6.35082e-139	0.566333	0.917	0.428	1.03601e-134	6
	Pdap1	1.70169e-138	0.572051	0.812	0.318	2.77596e-134	6
	Dbi	2.35877e-138	0.602447	0.952	0.554	3.84787e-134	6
	Med30	3.12597e-138	0.498565	0.752	0.251	5.0994e-134	6
	Minos1	8.37181e-138	0.59423	0.957	0.554	1.36569e-133	6
	Snrpd3	1.06341e-137	0.637627	0.857	0.39	1.73475e-133	6
	Fkbp4	2.27785e-137	0.60267	0.729	0.253	3.71586e-133	6
	Rps17	5.24541e-137	0.610244	0.998	0.954	8.55683e-133	6
	Dgcr6	8.37789e-137	0.418436	0.581	0.144	1.36669e-132	6
	Mrpl42	1.32412e-136	0.484892	0.696	0.221	2.16004e-132	6
	Ndufb6	3.74745e-135	0.506188	0.804	0.298	6.11322e-131	6
	Rpl28	6.33472e-135	0.513829	1	0.996	1.03338e-130	6
	Serbp1	1.82608e-134	0.651045	0.994	0.912	2.97888e-130	6
	Rps27l	2.61993e-134	0.620206	0.973	0.687	4.27389e-130	6
	Dap3	3.97838e-134	0.447861	0.68	0.201	6.48993e-130	6
	Tomm7	7.61296e-134	0.543398	0.992	0.884	1.2419e-129	6
	Casp8ap2	2.75197e-133	0.457723	0.659	0.189	4.48929e-129	6
	Hint1	1.64202e-132	0.565893	0.994	0.877	2.67863e-128	6
	Set	2.46987e-132	0.715242	0.959	0.781	4.02909e-128	6
	Paics	2.51349e-132	0.512061	0.643	0.194	4.10026e-128	6
	Hnrnpr	2.57294e-132	0.530025	0.781	0.282	4.19723e-128	6
	H2-Q2	4.8553e-132	0.325081	0.364	0.057	7.92045e-128	6
	Cops3	4.9882e-132	0.403209	0.574	0.146	8.13724e-128	6
	Hdac2	5.15061e-132	0.411662	0.591	0.154	8.40219e-128	6
	Ddx39b	5.56295e-132	0.581018	0.913	0.441	9.07484e-128	6
	Txnl1	9.85375e-132	0.496404	0.8	0.3	1.60744e-127	6
	Polr2j	2.2621e-131	0.50604	0.806	0.306	3.69016e-127	6
	Cox6c	3.17841e-131	0.536167	0.996	0.943	5.18494e-127	6
	Eri1	5.55508e-131	0.447697	0.607	0.167	9.06199e-127	6
	Trim37	5.81995e-131	0.256547	0.335	0.048	9.49408e-127	6
	Commd1	2.11845e-130	0.458638	0.733	0.244	3.45583e-126	6
	Hdac1	2.32944e-130	0.501558	0.75	0.264	3.80001e-126	6
	Slc25a5	5.40548e-130	0.586908	0.975	0.79	8.81796e-126	6
	Metap2	8.69749e-130	0.626083	0.959	0.591	1.41882e-125	6
	Mrps18c	1.33551e-129	0.461786	0.75	0.262	2.17861e-125	6
	Cdk2	1.49184e-129	0.32794	0.415	0.076	2.43364e-125	6
	Atp5g2	1.65654e-129	0.532539	0.994	0.901	2.70232e-125	6
	Impdh2	1.8415e-129	0.517642	0.707	0.236	3.00404e-125	6
	2010107E04Rik	6.02007e-129	0.543658	0.988	0.81	9.82054e-125	6
	Zfp704	1.7304e-128	0.295152	0.393	0.068	2.8228e-124	6
	Zfp422	1.76171e-128	0.343221	0.49	0.106	2.87388e-124	6
	Hsp90aa1	1.78002e-128	0.797917	0.975	0.859	2.90374e-124	6
	Stip1	1.89854e-128	0.470134	0.692	0.222	3.09708e-124	6
	Blm	5.96883e-128	0.268914	0.347	0.053	9.73695e-124	6
	Ppil1	1.35125e-127	0.34594	0.467	0.1	2.2043e-123	6
	Rfwd3	1.59524e-127	0.299754	0.411	0.076	2.60231e-123	6
	Cenpa	2.54258e-127	0.945921	0.709	0.269	4.14771e-123	6
	Chchd3	3.96091e-127	0.535862	0.694	0.238	6.46143e-123	6
	Tcp1	5.39619e-127	0.551898	0.839	0.358	8.8028e-123	6
	Prps2	5.49988e-127	0.432093	0.61	0.17	8.97196e-123	6
	Snrpd2	6.1618e-127	0.56656	0.957	0.709	1.00517e-122	6
	Trim59	6.52872e-127	0.393799	0.576	0.146	1.06503e-122	6
	Hist1h3e	3.54542e-126	0.306133	0.339	0.053	5.78365e-122	6
	Hnrnpa0	4.28275e-126	0.537467	0.988	0.852	6.98646e-122	6
	Psmc1	8.63882e-126	0.431187	0.657	0.199	1.40925e-121	6
	Lage3	1.37734e-125	0.374481	0.603	0.164	2.24686e-121	6
	Dazap1	1.0644e-124	0.45646	0.723	0.247	1.73636e-120	6
	Gm42047	1.08598e-124	0.487367	0.459	0.097	1.77155e-120	6
	Cox5b	7.22814e-124	0.533979	0.981	0.857	1.17913e-119	6
	Eif5a	8.20958e-124	0.743327	0.975	0.853	1.33923e-119	6
	Cdca4	3.36938e-123	0.274615	0.345	0.056	5.49646e-119	6
	Uqcr11	4.34817e-123	0.585483	0.973	0.713	7.09318e-119	6
	Mdh1	5.3691e-123	0.541359	0.901	0.429	8.75861e-119	6
	Pold2	5.39003e-123	0.275468	0.333	0.052	8.79276e-119	6
	Dck	7.44772e-123	0.46441	0.678	0.21	1.21495e-118	6
	Lef1	8.81483e-123	0.439444	0.558	0.141	1.43796e-118	6
	Idh2	1.07861e-122	0.39125	0.554	0.141	1.75954e-118	6
	Cd3g	1.33227e-122	0.607121	0.919	0.435	2.17333e-118	6
	Psmc4	3.83057e-122	0.465571	0.781	0.293	6.24881e-118	6
	Pmm1	5.25238e-122	0.320631	0.424	0.085	8.5682e-118	6
	Nelfe	6.80091e-122	0.351162	0.467	0.104	1.10943e-117	6
	Mrpl28	3.01363e-121	0.406514	0.655	0.199	4.91613e-117	6
	Atp5f1	3.27757e-121	0.526238	0.975	0.818	5.3467e-117	6
	Cisd1	7.47937e-121	0.427946	0.655	0.2	1.22011e-116	6
	Ndufa4	9.77652e-121	0.524013	0.988	0.905	1.59484e-116	6
	Rbl1	1.6996e-120	0.30398	0.409	0.079	2.77256e-116	6
	Kif18a	1.75076e-120	0.272988	0.353	0.059	2.85602e-116	6
	Cox8a	2.57425e-120	0.470721	0.998	0.968	4.19937e-116	6
	Gtf2a2	2.6891e-120	0.476437	0.829	0.33	4.38673e-116	6
	Sf3a3	3.24263e-120	0.396679	0.632	0.188	5.2897e-116	6
	Pdcd5	3.3245e-120	0.536487	0.876	0.424	5.42326e-116	6
	Nfyb	4.60467e-120	0.387256	0.541	0.139	7.51159e-116	6
	Slc29a1	4.91163e-120	0.344273	0.521	0.124	8.01233e-116	6
	Oaz1	1.30758e-119	0.436025	1	0.989	2.13305e-115	6
	Rcc2	1.53512e-119	0.500419	0.783	0.3	2.50424e-115	6
	Mrpl34	2.24713e-119	0.487184	0.75	0.282	3.66574e-115	6
	Larp7	3.01544e-119	0.440657	0.636	0.193	4.91909e-115	6
	Rnps1	3.44018e-119	0.411894	0.632	0.192	5.61197e-115	6
	Bcl11b	6.82638e-119	0.630299	0.837	0.322	1.11359e-114	6
	Wdhd1	1.16103e-118	0.261057	0.362	0.062	1.89398e-114	6
	Eif4a3	1.31645e-118	0.490841	0.729	0.27	2.14752e-114	6
	Chchd2	1.554e-118	0.480433	1	0.969	2.53504e-114	6
	Spint2	1.99402e-118	0.523967	0.843	0.321	3.25284e-114	6
	Hspb11	2.01458e-118	0.40078	0.581	0.162	3.28639e-114	6
	Mrpl14	2.85248e-118	0.457033	0.696	0.239	4.65324e-114	6
	Chchd1	4.14789e-118	0.525052	0.808	0.349	6.76646e-114	6
	Mrpl12	4.28924e-118	0.499936	0.684	0.239	6.99704e-114	6
	Rcbtb2	4.63862e-118	0.44497	0.605	0.176	7.56698e-114	6
	Cd8a	6.27337e-118	0.821304	0.769	0.299	1.02337e-113	6
	Prps1	1.34593e-117	0.27457	0.409	0.08	2.19562e-113	6
	Mrps14	3.58416e-117	0.521498	0.868	0.415	5.84683e-113	6
	Polr2c	7.23982e-117	0.41739	0.702	0.243	1.18103e-112	6
	Asrgl1	3.1999e-116	0.28683	0.417	0.084	5.22e-112	6
	Sarnp	3.90406e-116	0.496181	0.841	0.364	6.3687e-112	6
	Srsf2	1.42318e-115	0.583554	0.963	0.719	2.32163e-111	6
	Rhno1	1.43119e-115	0.300666	0.444	0.095	2.3347e-111	6
	Impdh1	1.45257e-115	0.319473	0.457	0.101	2.36957e-111	6
	Park7	1.89441e-115	0.580142	0.944	0.662	3.09035e-111	6
	Rnf7	2.34228e-115	0.456835	0.8	0.321	3.82097e-111	6
	Eloc	4.54752e-115	0.508791	0.87	0.407	7.41837e-111	6
	Smc6	5.1954e-115	0.547498	0.818	0.353	8.47526e-111	6
	Ddx1	1.60744e-114	0.355071	0.525	0.135	2.62221e-110	6
	Cox7c	2.72438e-114	0.441249	1	0.973	4.44428e-110	6
	Cdv3	3.02299e-114	0.608157	0.905	0.516	4.9314e-110	6
	Nedd4	5.54216e-114	0.431822	0.62	0.185	9.04092e-110	6
	Actl6a	6.55667e-114	0.430715	0.711	0.247	1.06959e-109	6
	Pfdn6	2.15249e-113	0.447556	0.75	0.287	3.51135e-109	6
	Cd3e	4.47359e-113	0.444386	0.886	0.31	7.29776e-109	6
	Psmb7	3.67603e-112	0.440323	0.719	0.265	5.9967e-108	6
	1110004F10Rik	5.8523e-112	0.484091	0.789	0.327	9.54685e-108	6
	Rfc2	1.10734e-111	0.428345	0.634	0.204	1.80641e-107	6
	Prdx1	1.51863e-111	0.480577	0.977	0.767	2.47735e-107	6
	Mrps33	2.22653e-111	0.48541	0.851	0.379	3.63215e-107	6
	Mrpl13	2.51753e-111	0.369206	0.605	0.182	4.10685e-107	6
	Cnot6	5.96161e-111	0.437394	0.721	0.251	9.72518e-107	6
	Rbmxl1	6.91452e-111	0.437759	0.614	0.198	1.12797e-106	6
	Emc8	7.16873e-111	0.366721	0.554	0.155	1.16944e-106	6
	Ncl	9.99233e-111	0.674639	0.986	0.889	1.63005e-106	6
	Gspt1	1.42004e-110	0.477308	0.748	0.294	2.3165e-106	6
	Syt13	1.46095e-110	0.29057	0.39	0.075	2.38325e-106	6
	Psmb2	1.63553e-110	0.485231	0.857	0.407	2.66804e-106	6
	Hnrnpk	1.92137e-110	0.466305	0.983	0.859	3.13434e-106	6
	Smarca5	5.21663e-110	0.543475	0.928	0.57	8.50989e-106	6
	Psmc3	1.33268e-109	0.451008	0.785	0.315	2.17399e-105	6
	Pgk1	1.64613e-109	0.479712	0.789	0.321	2.68533e-105	6
	Mrpl41	2.43757e-109	0.376385	0.597	0.179	3.97641e-105	6
	Snrpc	2.64054e-109	0.447669	0.833	0.349	4.30752e-105	6
	Umps	3.81485e-109	0.308532	0.403	0.085	6.22317e-105	6
	Ptbp1	5.76049e-109	0.43203	0.758	0.288	9.39708e-105	6
	Calm2	6.23758e-109	0.67779	0.961	0.822	1.01754e-104	6
	Ppa1	9.02359e-109	0.405175	0.494	0.129	1.47202e-104	6
	Baz1b	9.54249e-109	0.495695	0.754	0.291	1.55667e-104	6
	Znhit3	1.59592e-108	0.282335	0.411	0.088	2.60343e-104	6
	Aqp11	3.29391e-108	0.407009	0.682	0.207	5.37335e-104	6
	Fkbp3	4.45519e-108	0.537065	0.8	0.35	7.26774e-104	6
	Hikeshi	1.45716e-107	0.385797	0.634	0.207	2.37706e-103	6
	Rpp30	1.6705e-107	0.253744	0.362	0.069	2.72509e-103	6
	Lsm7	2.01784e-107	0.434058	0.684	0.247	3.29171e-103	6
	Ubap2	2.52312e-107	0.347337	0.502	0.13	4.11596e-103	6
	Ndufa11	3.6732e-107	0.454936	0.878	0.414	5.99209e-103	6
	Hist1h1e	5.16063e-107	0.723792	0.736	0.304	8.41854e-103	6
	Ndufa8	5.84953e-107	0.4556	0.831	0.361	9.54234e-103	6
	Atp5b	1.72734e-106	0.541597	0.965	0.843	2.81781e-102	6
	Smo	1.86554e-106	0.262305	0.368	0.07	3.04326e-102	6
	Tmem256	2.38875e-106	0.446969	0.789	0.315	3.89677e-102	6
	Npm3	3.16431e-106	0.461673	0.649	0.227	5.16195e-102	6
	Nop58	7.82191e-106	0.492721	0.657	0.231	1.27599e-101	6
	Fzr1	1.12324e-105	0.311163	0.401	0.087	1.83235e-101	6
	Ncaph2	1.21454e-105	0.356412	0.556	0.159	1.98128e-101	6
	Sf3b5	1.77279e-105	0.478759	0.86	0.409	2.89196e-101	6
	Gtf2h5	1.02584e-104	0.450194	0.841	0.375	1.67346e-100	6
	Isoc1	1.33198e-104	0.288812	0.44	0.102	2.17287e-100	6
	Cct7	1.57118e-104	0.485035	0.831	0.385	2.56307e-100	6
	Exosc3	1.71782e-104	0.377942	0.636	0.211	2.80228e-100	6
	Ndufc2	1.87727e-104	0.476316	0.94	0.57	3.06239e-100	6
	Uck2	2.47306e-104	0.306191	0.444	0.103	4.0343e-100	6
	Myef2	1.00126e-103	0.382186	0.521	0.143	1.63335e-99	6
	Prim2	1.06506e-103	0.25454	0.347	0.065	1.73743e-99	6
	Psmd12	1.25062e-103	0.422947	0.696	0.259	2.04014e-99	6
	Sec61b	1.30114e-103	0.490021	0.979	0.892	2.12255e-99	6
	Snrnp40	1.75266e-103	0.380507	0.622	0.205	2.85912e-99	6
	Nde1	2.28607e-103	0.319535	0.426	0.098	3.72926e-99	6
	Nsmce2	2.46027e-103	0.325704	0.525	0.144	4.01343e-99	6
	Rpa1	2.8071e-103	0.336722	0.506	0.135	4.57923e-99	6
	Nsmce1	3.0712e-103	0.441821	0.657	0.234	5.01005e-99	6
	Cox6b1	3.2644e-103	0.434347	0.992	0.879	5.32522e-99	6
	Ndufv2	9.81852e-103	0.434913	0.791	0.34	1.60169e-98	6
	Cenpx	1.53872e-102	0.434933	0.74	0.294	2.51012e-98	6
	Fdps	1.9504e-102	0.343468	0.428	0.1	3.18168e-98	6
	Gm525	2.13817e-102	0.263856	0.351	0.066	3.48799e-98	6
	Mrps28	5.27874e-102	0.357555	0.527	0.151	8.61121e-98	6
	Ssb	5.96416e-102	0.482429	0.899	0.481	9.72934e-98	6
	Mthfd2	6.2276e-102	0.284484	0.372	0.076	1.01591e-97	6
	Gins4	1.14957e-101	0.313805	0.436	0.106	1.87529e-97	6
	Cstf2	1.22427e-101	0.281322	0.417	0.094	1.99715e-97	6
	Prdx2	1.38726e-101	0.52003	0.907	0.541	2.26303e-97	6
[truncated: 6,361 more rows]

## Sheet: Supp. Table 6
	Supplementary Table 6. Differential expression analysis by edgeR between indicated cell types obtained from nt-LNA- and Ctr-treated mice
	Cell Type	Gene	logFC	logCPM	F	PValue	FDR
	B-cells	Uba52	1.06286	11.7687	564.9	1.80772e-112	4.5175e-109
	B-cells	Gm10076	1.39727	9.59153	515.121	1.32002e-103	1.64937e-100
	B-cells	Gm42418	-0.595945	12.6665	436.907	2.27881e-89	1.89825e-86
	B-cells	Hist1h2ap	1.51722	9.84225	403.811	9.37496e-83	5.85701e-80
	B-cells	Rps27rt	-1.03135	9.64438	375.615	6.19647e-78	3.097e-75
	B-cells	mt-Nd4l	0.824679	10.4956	299.422	2.32627e-63	9.68893e-61
	B-cells	Gm11808	-0.915157	9.58314	290.467	1.27947e-61	4.56769e-59
	B-cells	Lars2	-0.720705	9.46855	162.174	5.19992e-36	1.62433e-33
	B-cells	Btg1	-0.612914	10.8698	159.456	2.22153e-35	6.16845e-33
	B-cells	Tagln2	0.904139	10.1698	139.779	2.45672e-31	6.13935e-29
	B-cells	Crip1	0.869683	12.1708	129.873	2.72176e-29	6.18335e-27
	B-cells	AY036118	-0.772794	9.02709	120.056	2.64105e-27	5.49999e-25
	B-cells	Ahnak	0.889593	10.1761	115.312	2.86908e-26	5.51526e-24
	B-cells	Vim	0.832125	11.3574	114.731	3.79153e-26	6.76787e-24
	B-cells	S100a6	1.04014	11.6651	103.939	6.82344e-24	1.13678e-21
	B-cells	Chchd10	-0.73766	9.0923	84.942	6.79732e-20	1.06166e-17
	B-cells	Trbc2	0.957342	9.903	83.162	1.62711e-19	2.39185e-17
	B-cells	Vpreb3	-0.788089	9.2742	79.8673	8.13107e-19	1.12886e-16
	B-cells	Iglc1	1.14725	11.3056	77.2919	2.86595e-18	3.76947e-16
	B-cells	Atf3	0.725584	9.76197	67.1294	4.21113e-16	4.38484e-14
	B-cells	Itgb1	0.664324	9.28366	65.836	7.95645e-16	7.95327e-14
	B-cells	Anxa2	0.62063	9.33727	62.3351	4.46527e-15	3.98525e-13
	B-cells	Cr2	-0.633159	9.07785	60.3922	1.16951e-14	9.742e-13
	B-cells	Il6st	0.586183	9.00773	53.2665	3.9244e-13	2.72419e-11
	B-cells	Plk2	-0.598655	9.0643	50.9136	1.2948e-12	8.29666e-11
	B-cells	Stmn1	0.607373	9.04594	50.2414	1.80264e-12	1.02382e-10
	B-cells	Tppp3	0.636318	9.37456	46.1562	1.39238e-11	6.82267e-10
	B-cells	Lmna	0.602429	9.14902	45.3716	2.06171e-11	9.54113e-10
	NK-cells	Uba52	1.171	11.423	298.028	7.75345e-58	1.95464e-54
	NK-cells	Gm42418	-0.59685	12.6137	157.343	2.34037e-33	2.95004e-30
	NK-cells	Gm10076	1.31352	9.46073	122.01	1.12397e-26	9.44512e-24
	NK-cells	Gm11808	-0.974518	9.56373	88.6488	3.90341e-20	2.46012e-17
	NK-cells	Lars2	-0.875803	9.59184	69.8499	2.43751e-16	1.22899e-13
	NK-cells	Hist1h2ap	1.25461	9.67517	69.7513	4.33572e-16	1.82173e-13
	NK-cells	mt-Atp6	-0.590199	12.8484	67.2193	1.37919e-15	4.96704e-13
	NK-cells	AY036118	-0.9437	9.16377	52.2275	1.06124e-12	2.97265e-10
	NK-cells	Rps27rt	-0.695658	9.47934	39.6536	4.75357e-10	9.76229e-08
	NK-cells	Igkc	1.22647	10.0826	39.9165	5.0341e-10	9.76229e-08
	NK-cells	mt-Nd3	-0.611917	9.95787	35.5401	4.06045e-09	6.82426e-07
	NK-cells	Gstp1	0.774084	9.1601	33.7141	1.82184e-08	2.55159e-06
	NK-cells	Cxcr4	-0.740089	9.73186	31.8571	2.51754e-08	3.34037e-06
	NK-cells	Sertad2	-0.712666	9.1037	28.0487	6.29607e-07	7.21472e-05
	NK-cells	Grcc10	0.604632	9.29258	22.6798	2.23257e-06	0.000201011
	NK-cells	H2-Eb1	0.835827	9.57156	20.9583	5.66428e-06	0.000475988
	NK-cells	Ifi27l2a	0.756515	9.79769	19.2468	1.34787e-05	0.00109612
	NK-cells	Xcl1	0.753763	10.622	17.2735	3.68769e-05	0.00232417
	NK-cells	Ccl4	0.615753	12.6958	15.3413	9.96094e-05	0.00512282
	NK-cells	Atf3	0.621869	9.2245	14.855	0.000128029	0.00620696
	NK-cells	Cd74	0.738483	10.4867	13.7356	0.000229073	0.00942602
	T-cells	Uba52	1.20138	11.819	364.545	1.15937e-74	2.09266e-71
	T-cells	Gm10076	1.36351	10.2135	270.013	6.12174e-57	5.52487e-54
	T-cells	Gm11808	-0.781927	10.1817	115.27	3.61783e-26	1.63255e-23
	T-cells	Rps27rt	-0.772833	10.0687	109.483	5.71906e-25	1.90615e-22
	T-cells	mt-Nd4l	0.80038	11.2355	109.326	6.33625e-25	1.90615e-22
	T-cells	Hist1h2ap	1.06639	11.407	107.645	1.47686e-24	3.8082e-22
	T-cells	Lars2	-0.744773	10.2613	102.265	1.81099e-23	4.08605e-21
	T-cells	AY036118	-0.871189	9.96764	120.331	9.5613e-23	1.91757e-20
	T-cells	Igkc	1.09228	10.5857	75.7371	6.99132e-18	1.26193e-15
	T-cells	Ifi27l2a	0.755754	10.2642	52.7527	5.52054e-13	7.66506e-11
	T-cells	Dgat1	-0.603735	10.1433	34.8492	4.22167e-09	3.04805e-07
	T-cells	Hspd1	0.599443	10.2941	33.7365	7.39591e-09	4.9443e-07
	T-cells	Cd74	0.696507	10.8629	30.326	4.15885e-08	2.14478e-06
	T-cells	Ctla2a	-0.651538	11.0862	28.781	9.11485e-08	4.32955e-06

## Sheet: Supp. Table 7
	Supplementary Table 7. Differential expression analysis by edgeR between myeloid cells obtained from nt-LNA- and Ctr-treated mice.
	Gene	logFC	logCPM	F	PValue	FDR
	Uba52	1.30262	10.9493	1047.39	1.48376e-196	7.67551e-193
	Gm10076	1.58672	8.81684	1015.81	1.73666e-191	4.49186e-188
	Gm42418	-0.698321	12.3935	707.022	1.19168e-139	2.05486e-136
	AY036118	-0.997157	8.04382	304.806	5.39408e-65	6.97589e-62
	Hist1h2ap	1.55552	10.632	300.022	5.38058e-64	5.56675e-61
	mt-Nd4l	0.719346	9.82078	251.235	2.45018e-54	2.11246e-51
	Gm11808	-0.703812	8.68695	228.412	9.70268e-50	7.17028e-47
	Rps27rt	-0.706137	8.47288	204.58	6.69989e-45	4.33232e-42
	Ftl1-ps1	-0.890845	7.88194	171.141	4.82299e-38	2.49493e-35
	Sdcbp	-0.662039	9.17506	162.685	2.73011e-36	1.28389e-33
	Csf3r	-1.03714	8.26649	158.43	2.12568e-35	9.16345e-33
	Il1r2	-1.05612	8.32751	158.195	2.37784e-35	9.46199e-33
	Jdp2	-0.839329	8.04042	154.13	1.60937e-34	5.94661e-32
	Cotl1	-0.628908	9.37894	146.987	4.94409e-33	1.70505e-30
	Lars2	-0.586965	8.64731	143.767	2.28053e-32	7.37322e-30
	Trem1	-0.929264	8.14241	137.122	5.70582e-31	1.73625e-28
	Vasp	-0.659853	8.55738	131.471	8.51443e-30	2.44695e-27
	Cd300lf	-0.85668	8.07256	131.33	9.22486e-30	2.48407e-27
	Cebpa	-0.814645	7.95353	131.218	9.60399e-30	2.48407e-27
	Ctsd	-0.822812	9.77444	128.098	4.39844e-29	1.08348e-26
	Grina	-0.779657	8.40094	125.608	1.4605e-28	3.43417e-26
	Ninj1	-0.813056	8.49196	119.994	2.20362e-27	4.95623e-25
	Clec4d	-0.909597	8.32686	119.383	2.96165e-27	6.38359e-25
	Msrb1	-0.79976	9.38166	117.846	6.23383e-27	1.2899e-24
	Cstb	-0.80532	9.49561	111.221	1.54834e-25	2.96651e-23
	Tpd52	-0.639144	8.79842	108.707	5.24137e-25	9.34952e-23
	Cxcr4	-0.606834	8.96207	108.461	5.90034e-25	1.01741e-22
	Hist1h2ae	0.888769	8.94513	105.804	2.15446e-24	3.59517e-22
	Clec4e	-0.869551	8.55577	105.323	2.72256e-24	4.40119e-22
	Sorl1	-0.688557	8.38714	104.118	4.88666e-24	7.66022e-22
	Gstp1	0.589704	8.14142	103.743	5.7807e-24	8.79517e-22
	Litaf	-0.652807	8.56966	103.709	5.96476e-24	8.81591e-22
	Arpp21	0.721841	8.56583	103.625	6.21955e-24	8.93715e-22
	Il1rn	-0.921271	8.40702	103.303	7.28267e-24	1.0182e-21
	Il10rb	-0.62357	8.2439	103.061	8.07192e-24	1.09884e-21
	Uap1l1	-0.693316	7.86325	101.686	1.57565e-23	2.08996e-21
	C5ar1	-0.755243	8.20388	101.155	2.0724e-23	2.68013e-21
	Cebpb	-0.743365	10.4466	100.235	3.24871e-23	4.00133e-21
	Slc15a3	-0.674242	8.25829	99.6116	4.38743e-23	5.27818e-21
	Plek	-0.633583	8.92121	97.2699	1.38075e-22	1.58725e-20
	Ccr1	-0.76337	8.43416	96.6726	1.84903e-22	2.07935e-20
	Tnfaip2	-0.768688	8.57264	95.1084	3.97147e-22	4.37115e-20
	Tmem86a	-0.693402	7.87823	94.4874	5.32707e-22	5.74103e-20
	Txnip	-0.611604	8.70309	94.1945	6.2012e-22	6.54669e-20
	Amdhd2	-0.644018	7.8872	93.3531	9.24491e-22	9.37724e-20
	Rnf149	-0.632416	8.66635	92.841	1.20333e-21	1.17449e-19
	H2afv	0.642637	9.41713	92.3997	1.49405e-21	1.43124e-19
	Bcl11b	0.683043	8.61273	92.3406	1.53727e-21	1.44587e-19
	Cd2	0.680923	8.23305	91.2936	2.55685e-21	2.36189e-19
	Plk3	-0.688682	7.99069	89.9196	5.00764e-21	4.4663e-19
	Slfn1	-0.751942	8.16718	88.044	1.26234e-20	1.08835e-18
	Gmnn	0.664517	8.23937	87.9386	1.32644e-20	1.12486e-18
	Lat	0.649047	8.77455	87.7635	1.44827e-20	1.20837e-18
	Thbs1	-0.943681	9.35521	87.3719	1.75564e-20	1.44158e-18
	Aqp11	0.614225	8.11992	85.4527	4.4562e-20	3.60186e-18
	Cd93	-0.704855	8.0141	84.2475	8.12579e-20	6.27384e-18
	C3	-0.741258	8.06989	82.6166	1.81407e-19	1.30336e-17
	Tgfbi	-0.696742	9.30832	81.6162	2.96796e-19	2.10318e-17
	Nlrp3	-0.64377	8.21173	80.236	5.84744e-19	4.03318e-17
	Cdca7	0.656724	8.29863	79.2421	9.54266e-19	6.24863e-17
	Hist1h1b	0.774388	8.94456	78.6792	1.25999e-18	8.0468e-17
	Clec4n	-0.776037	8.47703	77.6586	2.08343e-18	1.31434e-16
	Cd8b1	0.706405	9.37243	77.0186	2.8564e-18	1.78026e-16
	Mxd1	-0.676371	8.4868	76.6815	3.37283e-18	2.0771e-16
	Ube2c	0.830589	8.69775	76.5921	3.52487e-18	2.14519e-16
	Cd63	-0.781586	9.03733	76.5363	3.62316e-18	2.17937e-16
	Gsr	-0.608745	8.54512	75.5011	6.03695e-18	3.50889e-16
	Cd33	-0.63068	7.94043	75.0712	7.43049e-18	4.27088e-16
	Cd3d	0.622877	8.9027	74.1279	1.18907e-17	6.52708e-16
	Mzb1	0.693948	8.18496	73.4489	1.66224e-17	8.86472e-16
	Tgm2	-0.652634	8.17486	73.1137	1.96162e-17	1.0293e-15
	Cd3g	0.648806	9.08116	73.106	1.96985e-17	1.0293e-15
	Stmn1	0.777564	10.1039	72.7784	2.31596e-17	1.19805e-15
	Tcn2	-0.585354	8.02538	72.2868	2.93672e-17	1.48938e-15
	Ifitm6	-0.744753	8.36974	71.854	3.65721e-17	1.83677e-15
	Tcf7	0.643797	9.27088	71.7832	3.78739e-17	1.88386e-15
	Ifitm1	-0.86385	9.0473	70.8339	6.05651e-17	2.98384e-15
	Ly6d	0.659754	9.89622	69.5544	1.14063e-16	5.31577e-15
	Ms4a6d	-0.651408	8.54678	69.526	1.15679e-16	5.34292e-15
	Igsf6	-0.587075	8.14949	69.0057	1.4939e-16	6.66204e-15
	Hmox1	-0.650743	8.05235	67.3612	3.37816e-16	1.45627e-14
	Cks1b	0.605015	8.21606	66.305	5.70129e-16	2.37845e-14
	Mcemp1	-0.630978	8.11411	65.7197	7.62343e-16	3.15488e-14
	Pygl	-0.620901	7.98196	65.1649	1.00308e-15	3.9915e-14
	Maf	-0.644044	8.12176	63.9196	1.86272e-15	7.08519e-14
	Mns1	0.597038	8.13672	63.4723	2.3243e-15	8.58829e-14
	Fcgr1	-0.603273	8.20599	60.8909	8.39056e-15	2.81847e-13
	Hp	-0.718646	8.84798	60.142	1.2181e-14	3.98811e-13
	Lockd	0.609036	8.18034	59.5881	1.60439e-14	5.12315e-13
	Trbc2	0.659433	10.5859	57.9223	3.67855e-14	1.11281e-12
	Anxa3	-0.587927	8.1337	56.1761	8.78354e-14	2.46942e-12
	Trbc1	0.688691	10.0452	55.9008	1.00782e-13	2.78794e-12
	Ms4a4c	-0.598944	8.74771	55.5807	1.18235e-13	3.21911e-12
	AA467197	-0.670926	8.56192	55.0465	1.54354e-13	4.07384e-12
	Pclaf	0.682706	9.00817	53.8231	2.8435e-13	7.038e-12
	Dut	0.599474	9.00763	52.3881	5.82546e-13	1.33934e-11
	Birc5	0.628814	8.59979	51.8604	7.5849e-13	1.70594e-11
	Mafb	-0.592468	8.81294	48.6548	3.77685e-12	7.26307e-11
	Ccl3	-0.671669	8.96984	48.6311	3.8219e-12	7.32248e-11
	Fabp5	-0.706935	10.0175	47.659	6.2234e-12	1.14162e-10
	S100a9	-1.00069	12.8061	46.8998	9.1098e-12	1.57083e-10
	S100a8	-0.96364	12.8283	43.403	5.28329e-11	8.10994e-10
	Igkc	0.709757	11.4937	41.4341	1.42463e-10	1.92921e-09
	Il1b	-0.588287	10.7955	37.3612	1.11493e-09	1.30487e-08

## Sheet: Supp. Table 8
	Supplementary Table 8. Gene Ontology Processes Tree of genes significantly altered by nt-LNA in myeloid cells of the atherosclerotic lesion.
	GO Process	-log10(pval(adj))	Gene#	GeneHits
	Behavior	2.5	1067	16
	Biological Adhesion	6.85	1246	27
	Biological Regulation	5.69	16673	130
	Biomineralization	0.23	137	1
	Cell Killing	5.42	198	10
	Cell Population Proliferation	4.99	936	20
	Cellular Component Organization or Biogenesis	6.34	7755	80
	Cellular Process	7.81	19190	143
	Detoxification	1.09	8	1
	Developmental Process	6.22	8551	85
	Growth	0.61	776	7
	Immune System Process	27.4	4211	90
	Localization	8.8	7416	84
	Locomotion	5.46	1885	31
	Metabolic Process	1.66	10754	81
	Multi-Organism Process	14.6	4565	75
	Multi-Cellular Organismal Process	5.04	10360	93
	Pigmentation	1.13	126	3
	Reproduction	2.69	2486	29
	Reproductive Process	2.71	2480	29
	Response to Stimulus	7.22	12327	111
	Rhythmic Process	0.34	543	4
	Siganling	6.12	7706	79
	Immune System Process	-log10(pval(adj))	Gene#	GeneHits
	Activation of Immune Response	11.0919	971	30
	Antigen Processing and Presentation	0.239276	469	3
	Immune System Development	10.9965	1199	33
	Leukocyte Activation	24.6562	1369	53
	Leukocyte Homeostasis	2.31319	135	5
	Leukocyte Migration	9.03489	559	21
	Myeloid Cell Homeostasis	2.9024	207	7
	Adaptive Immune Response	3.54257	1016	18
	Humoral Immune Response	3.66675	635	14
	Inflammatory Response to Antigenic Stimulus	5.44466	75	7
	Innate Immune Response	5.70465	1258	25
	Type 2 Immune Response	0.934047	13	1

## Sheet: Supp. Table 9
	Supplementary Table 9. Comprehensive gene enrichment analysis of re-clustered myeloid cell population.
	gene	p_val	avg_logFC	pct.1	pct.2	p_val_adj	cluster
	Birc5	0	1.84674	0.948	0.171	0	0
	Nusap1	0	1.75663	0.809	0.082	0	0
	Rrm2	0	1.75223	0.898	0.087	0	0
	Tyms	0	1.48635	0.888	0.104	0	0
	Lockd	0	1.42126	0.914	0.105	0	0
	Cdca8	0	1.41991	0.865	0.096	0	0
	Spc24	0	1.3997	0.912	0.081	0	0
	Kif11	0	1.37379	0.815	0.069	0	0
	Prc1	0	1.36728	0.819	0.086	0	0
	Cks1b	0	1.34674	0.928	0.132	0	0
	Uhrf1	0	1.28423	0.886	0.1	0	0
	Mns1	0	1.28208	0.892	0.114	0	0
	Cdca3	0	1.24736	0.821	0.072	0	0
	Cdk1	0	1.23174	0.811	0.071	0	0
	Ccna2	0	1.22367	0.829	0.069	0	0
	Clspn	0	1.22051	0.815	0.069	0	0
	Fbxo5	0	1.1353	0.785	0.065	0	0
	Kif15	0	1.06399	0.809	0.077	0	0
	Cenpw	0	0.992107	0.865	0.1	0	0
	Hmgb3	0	0.953632	0.793	0.07	0	0
	Tpx2	2.94057e-302	1.37563	0.785	0.079	4.53819e-298	0
	Pclaf	8.98887e-297	2.15433	0.968	0.275	1.38725e-292	0
	Spc25	7.0511e-296	1.12503	0.745	0.063	1.0882e-291	0
	Sgo1	1.26705e-292	0.841494	0.695	0.044	1.95544e-288	0
	Pbk	1.18368e-291	0.903553	0.693	0.044	1.82678e-287	0
	Prim1	4.13384e-291	0.954906	0.781	0.08	6.37976e-287	0
	Gmnn	4.7106e-289	1.29428	0.932	0.202	7.26988e-285	0
	Rrm1	6.29039e-285	1.13563	0.878	0.142	9.70796e-281	0
	Ncapd2	1.45201e-282	0.912044	0.779	0.082	2.24089e-278	0
	Rfc4	1.19371e-281	1.00231	0.805	0.104	1.84225e-277	0
	Rad51ap1	3.64144e-281	0.73653	0.679	0.045	5.61984e-277	0
	Esco2	6.63675e-281	0.886185	0.649	0.036	1.02425e-276	0
	Ncapg	1.01206e-280	0.707238	0.633	0.03	1.56192e-276	0
	Smc2	1.0121e-277	1.29552	0.918	0.194	1.56198e-273	0
	Cdca7	3.41153e-277	1.40426	0.898	0.189	5.26502e-273	0
	Tipin	5.72668e-277	1.12299	0.882	0.155	8.83799e-273	0
	Lig1	4.76877e-276	1.15708	0.865	0.136	7.35964e-272	0
	Stmn1	1.02465e-273	2.40107	1	0.638	1.58135e-269	0
	Asf1b	1.57378e-273	0.775018	0.713	0.06	2.42881e-269	0
	Knl1	3.11061e-273	0.99449	0.735	0.071	4.8006e-269	0
	Mxd3	9.37933e-271	0.777795	0.606	0.029	1.44751e-266	0
	Ccdc34	4.84969e-270	1.00524	0.861	0.14	7.48453e-266	0
	Mcm7	1.22689e-269	1.13216	0.878	0.158	1.89345e-265	0
	Cdca5	3.31047e-268	0.618877	0.586	0.023	5.10905e-264	0
	Bub1b	1.1641e-267	0.895462	0.709	0.064	1.79656e-263	0
	Mki67	1.35236e-267	1.90688	0.964	0.31	2.08709e-263	0
	Ezh2	3.42824e-267	1.47267	0.98	0.386	5.2908e-263	0
	Hmgn2	2.74368e-266	1.86857	1	0.714	4.23433e-262	0
	Cenpk	6.25535e-266	0.77374	0.741	0.079	9.65389e-262	0
	Cenpp	6.4605e-266	0.603299	0.614	0.032	9.97049e-262	0
	Ube2c	1.85623e-264	1.96346	0.817	0.124	2.86472e-260	0
	Hmgb1	9.03013e-264	1.81247	1	0.993	1.39362e-259	0
	Cenpf	2.23431e-262	1.58081	0.785	0.101	3.44822e-258	0
	Hist1h2ab	4.57131e-262	0.907959	0.614	0.036	7.05491e-258	0
	Dut	1.1018e-259	1.9877	0.976	0.465	1.70041e-255	0
	Shcbp1	1.13976e-258	0.631047	0.598	0.03	1.75899e-254	0
	Anp32e	7.17055e-257	1.6057	1	0.758	1.10663e-252	0
	Ccnb2	5.58978e-256	1.15897	0.743	0.086	8.6267e-252	0
	H2afv	1.3148e-254	1.63657	1	0.811	2.02913e-250	0
	Tk1	2.64651e-254	0.752837	0.651	0.049	4.08436e-250	0
	Hmgb2	5.81957e-254	1.9049	1	0.97	8.98135e-250	0
	Trdc	7.73822e-254	1.17387	0.679	0.061	1.19424e-249	0
	1500009L16Rik	8.37862e-254	0.827307	0.582	0.029	1.29307e-249	0
	Top2a	1.70972e-251	2.04267	0.938	0.333	2.63861e-247	0
	Anp32b	9.44047e-250	1.37304	1	0.942	1.45695e-245	0
	Cenpm	2.41542e-249	0.658546	0.61	0.039	3.72771e-245	0
	Ptma	8.822e-249	1.43555	1	0.997	1.3615e-244	0
	Cenpe	3.49181e-244	1.1722	0.729	0.091	5.38891e-240	0
	Dtl	1.36812e-243	0.868772	0.739	0.093	2.11142e-239	0
	Tacc3	8.41776e-243	0.870708	0.719	0.087	1.29911e-238	0
	Phgdh	3.57566e-242	1.12866	0.837	0.162	5.51831e-238	0
	Hist1h3c	1.05402e-241	0.721984	0.546	0.025	1.62667e-237	0
	Kif22	1.52708e-240	0.715737	0.629	0.05	2.35675e-236	0
	Hmmr	2.4499e-239	1.03603	0.631	0.052	3.78092e-235	0
	Rad51	8.85367e-239	0.64242	0.606	0.044	1.36639e-234	0
	Aurkb	4.94926e-238	0.803981	0.653	0.062	7.6382e-234	0
	Ncapd3	1.14408e-237	0.903421	0.811	0.14	1.76565e-233	0
	Mcm3	2.61899e-236	1.06608	0.857	0.176	4.04189e-232	0
	Smc4	7.29567e-236	1.39867	0.992	0.681	1.12594e-231	0
	Ran	2.2748e-235	1.29631	0.998	0.924	3.5107e-231	0
	Cbx3	9.42752e-235	1.26238	0.998	0.813	1.45495e-230	0
	Cenph	1.51787e-234	0.597891	0.586	0.039	2.34252e-230	0
	Mcm6	2.73992e-233	1.1143	0.831	0.167	4.22852e-229	0
	Hells	3.18714e-233	1.05986	0.725	0.1	4.91871e-229	0
	H2afz	1.58365e-231	1.3319	1	0.992	2.44405e-227	0
	Orc6	1.85322e-231	0.791315	0.735	0.102	2.86008e-227	0
	Dnmt1	1.87558e-231	1.24899	0.93	0.317	2.89459e-227	0
	Tubb5	4.75219e-231	1.58749	1	0.915	7.33406e-227	0
	Skap1	6.89655e-231	1.14841	0.942	0.319	1.06434e-226	0
	Hmgn5	3.10234e-229	0.949831	0.853	0.181	4.78785e-225	0
	Selenoh	5.10398e-229	1.13397	0.984	0.572	7.87697e-225	0
	Ccnb1	5.58536e-229	0.865924	0.586	0.043	8.61989e-225	0
	Ppia	1.46249e-228	1.0604	1	0.999	2.25705e-224	0
	Dhfr	2.3335e-228	0.71923	0.643	0.063	3.60129e-224	0
	Rpa3	2.8885e-228	0.97853	0.924	0.28	4.45782e-224	0
	Hist1h1a	7.28071e-228	0.762132	0.635	0.06	1.12363e-223	0
	Mad2l1	1.91065e-227	0.678889	0.667	0.07	2.94871e-223	0
	Ndc80	9.76534e-227	0.685447	0.598	0.048	1.50709e-222	0
	Mcm5	5.50141e-226	0.932452	0.791	0.137	8.49033e-222	0
	Snrpd1	6.95694e-226	1.17412	0.996	0.81	1.07366e-221	0
	Cdc20	2.46114e-225	0.931253	0.606	0.052	3.79828e-221	0
	Tmpo	1.40784e-224	1.25237	0.986	0.605	2.17272e-220	0
	Nucks1	1.5436e-223	1.26322	0.996	0.787	2.38223e-219	0
	Dnajc9	3.58896e-223	1.07256	0.91	0.301	5.53884e-219	0
	Ncaph	3.84661e-223	0.581126	0.548	0.033	5.93647e-219	0
	Incenp	9.8543e-222	0.926371	0.717	0.107	1.52081e-217	0
	Snrpe	1.00636e-221	0.936209	1	0.966	1.55311e-217	0
	Cbx5	1.27163e-221	1.03709	0.884	0.237	1.9625e-217	0
	Cmc2	1.24778e-220	0.826124	0.831	0.17	1.9257e-216	0
	Dtymk	1.73565e-220	1.05538	0.92	0.3	2.67862e-216	0
	Atad2	4.30258e-220	1.28886	0.904	0.276	6.64018e-216	0
	Snrpg	2.91601e-219	0.931871	1	0.978	4.50027e-215	0
	Rnaseh2b	5.09005e-219	0.771238	0.807	0.154	7.85548e-215	0
	Usp1	5.18633e-219	1.04323	0.932	0.312	8.00406e-215	0
	Ube2s	6.2735e-218	1.42901	0.998	0.884	9.6819e-214	0
	Sgo2a	7.55215e-217	0.582342	0.53	0.031	1.16552e-212	0
	Kif4	2.32422e-216	0.631951	0.556	0.039	3.58697e-212	0
	Dntt	1.0184e-215	1.60571	0.952	0.56	1.57169e-211	0
	Tuba1b	1.30765e-214	1.5348	0.992	0.844	2.01809e-210	0
	Bub1	1.4939e-213	0.605756	0.556	0.041	2.30554e-209	0
	Cbx1	2.36698e-212	1.0239	0.988	0.668	3.65295e-208	0
	Dlgap5	2.97268e-212	0.719476	0.586	0.052	4.58773e-208	0
	Dgkeos	6.90925e-212	0.912245	0.781	0.142	1.0663e-207	0
	Hist1h4d	1.08623e-211	1.42516	0.861	0.265	1.67639e-207	0
	Ncapg2	2.04975e-211	0.764733	0.731	0.112	3.16337e-207	0
	Sumo2	5.18058e-211	0.92376	1	0.968	7.99519e-207	0
	Psip1	5.94028e-211	1.04458	0.97	0.481	9.16763e-207	0
	Neil3	1.30139e-210	0.527321	0.508	0.027	2.00843e-206	0
	Dek	4.88903e-210	1.26346	0.996	0.864	7.54523e-206	0
	Sh2d1a	6.85828e-210	1.22456	0.863	0.234	1.05844e-205	0
	Racgap1	8.51845e-210	0.847658	0.743	0.125	1.31465e-205	0
	Fignl1	1.31331e-209	0.483899	0.508	0.028	2.02683e-205	0
	Hist1h1b	2.34491e-209	1.98993	0.918	0.395	3.61891e-205	0
	Nuf2	2.44407e-209	0.513246	0.496	0.026	3.77194e-205	0
	Plk1	2.46759e-209	0.649284	0.508	0.029	3.80824e-205	0
	Hist1h2ap	2.72641e-208	2.38616	0.992	0.783	4.20768e-204	0
	Cdc45	5.41948e-206	0.5426	0.55	0.042	8.36389e-202	0
	Mcm2	5.97048e-205	0.781908	0.717	0.115	9.21425e-201	0
	Hist1h2bj	1.78097e-203	0.635419	0.566	0.052	2.74858e-199	0
	Snrpf	2.84007e-203	1.00301	1	0.939	4.38308e-199	0
	Tcf7	3.725e-203	1.44028	0.958	0.646	5.7488e-199	0
	Trbc2	5.24876e-203	1.8036	0.966	0.739	8.10041e-199	0
	Hist1h2ae	9.88086e-203	1.93294	0.928	0.431	1.52491e-198	0
	Desi1	1.82368e-202	0.970686	0.912	0.315	2.81448e-198	0
	Ckap2l	1.1521e-201	0.658367	0.59	0.06	1.77804e-197	0
	Ska1	1.41353e-201	0.544798	0.518	0.036	2.1815e-197	0
	Wdr76	1.99786e-201	0.655718	0.637	0.079	3.0833e-197	0
	Haus4	2.20721e-201	0.670367	0.695	0.106	3.40638e-197	0
	Chaf1a	3.80992e-200	0.583642	0.58	0.058	5.87986e-196	0
	Mis18bp1	2.36389e-198	0.630562	0.564	0.052	3.64819e-194	0
	H2afx	3.25316e-198	1.75928	0.906	0.427	5.0206e-194	0
	Hirip3	4.2433e-198	0.718644	0.679	0.102	6.54869e-194	0
	Topbp1	6.26341e-198	0.830385	0.845	0.217	9.66631e-194	0
	Lsm2	6.54198e-198	0.976531	0.912	0.354	1.00962e-193	0
	Nsd2	3.88389e-196	0.952994	0.906	0.296	5.99401e-192	0
	Hist1h3b	4.89184e-196	0.473299	0.434	0.016	7.54957e-192	0
	Hist1h2ag	2.69195e-195	0.468738	0.46	0.022	4.15449e-191	0
	Alyref	4.34953e-195	1.00463	0.968	0.698	6.71263e-191	0
	Xrcc6	1.0111e-194	0.964573	0.871	0.261	1.56044e-190	0
	Ctcf	1.35755e-194	1.02715	0.984	0.753	2.09511e-190	0
	Hist1h2af	1.73097e-193	0.509923	0.454	0.022	2.6714e-189	0
	Ect2	9.64753e-193	0.555654	0.484	0.031	1.4889e-188	0
	Cenps	3.43408e-192	0.530605	0.54	0.048	5.29981e-188	0
	Erh	8.60379e-192	0.990784	0.982	0.786	1.32782e-187	0
	Rpa2	8.9787e-192	0.794921	0.741	0.145	1.38568e-187	0
	Them6	2.18186e-191	0.765344	0.775	0.163	3.36726e-187	0
	Hnrnpab	4.44998e-191	0.914195	0.996	0.853	6.86766e-187	0
	Pola1	6.84033e-191	0.630278	0.588	0.066	1.05567e-186	0
	Kif20b	2.59213e-190	0.686596	0.588	0.069	4.00043e-186	0
	Syce2	6.61183e-190	0.720266	0.665	0.102	1.0204e-185	0
	Rfc5	4.48336e-189	0.596216	0.649	0.092	6.91916e-185	0
	Tfdp1	2.53411e-188	0.776745	0.741	0.153	3.91089e-184	0
	Thy1	3.40787e-188	1.20057	0.958	0.568	5.25937e-184	0
	Nasp	3.4301e-188	1.06214	0.926	0.429	5.29368e-184	0
	Lat	1.24603e-187	1.12342	0.96	0.576	1.92299e-183	0
	Spag5	8.46235e-187	0.495741	0.478	0.03	1.30599e-182	0
	Hmgn1	2.54645e-186	0.967502	0.978	0.708	3.92993e-182	0
	Atp5h	3.62877e-186	0.755548	1	0.993	5.60029e-182	0
	Diaph3	3.69093e-185	0.588469	0.548	0.056	5.69622e-181	0
	Aurka	4.13869e-185	0.563334	0.498	0.038	6.38724e-181	0
	Snu13	8.02503e-183	0.939227	0.984	0.863	1.2385e-178	0
	Plk4	2.7155e-182	0.682253	0.721	0.133	4.19083e-178	0
	Hist1h2an	3.91606e-182	0.664223	0.528	0.052	6.04366e-178	0
	Ppp1r14b	8.00252e-182	1.10061	0.98	0.846	1.23503e-177	0
	Srsf3	1.24177e-181	0.886782	1	0.966	1.91642e-177	0
	C330027C09Rik	2.59554e-181	0.531951	0.506	0.042	4.0057e-177	0
	Cd3g	2.99986e-181	1.31992	0.942	0.614	4.62968e-177	0
	Atad5	1.56541e-179	0.545321	0.554	0.06	2.4159e-175	0
	Hnrnpa1	5.00302e-178	0.908016	0.998	0.914	7.72116e-174	0
	Gins2	7.44196e-178	0.554778	0.556	0.063	1.14852e-173	0
	E2f2	1.26984e-177	0.809198	0.785	0.187	1.95974e-173	0
	Nt5c3b	2.16632e-177	0.580364	0.687	0.12	3.34328e-173	0
	Hjurp	1.45351e-176	0.824158	0.861	0.257	2.2432e-172	0
	Kif2c	3.31407e-176	0.426354	0.434	0.024	5.1146e-172	0
	2020-09-01	5.10229e-176	0.872015	0.972	0.568	7.87436e-172	0
	Pole	7.74983e-176	0.451944	0.464	0.033	1.19603e-171	0
	Rfc3	1.16744e-175	0.714843	0.691	0.129	1.80171e-171	0
	Cdc6	2.35222e-175	0.544295	0.478	0.038	3.63018e-171	0
	Ccne2	3.40546e-175	0.562273	0.454	0.03	5.25564e-171	0
	Aspm	2.05956e-174	0.644595	0.486	0.041	3.17852e-170	0
	Ccdc18	2.37606e-174	0.485157	0.444	0.028	3.66697e-170	0
	Lsm6	6.21738e-174	0.786948	0.982	0.722	9.59528e-170	0
	1700097N02Rik	1.54005e-173	0.69205	0.635	0.101	2.37676e-169	0
	Mrpl18	1.77257e-173	0.819039	0.962	0.646	2.73561e-169	0
	Knstrn	3.69828e-173	0.614663	0.588	0.077	5.70755e-169	0
	Lsm3	4.7645e-173	0.799068	0.96	0.556	7.35306e-169	0
	Ppih	4.52619e-172	0.691546	0.787	0.204	6.98527e-168	0
	Cit	1.60441e-171	0.485608	0.498	0.045	2.47608e-167	0
	Dbf4	2.2522e-171	0.696923	0.717	0.152	3.47583e-167	0
	Hnrnpa3	8.56119e-171	0.853002	1	0.982	1.32125e-166	0
	Foxm1	8.77978e-171	0.45605	0.452	0.032	1.35498e-166	0
	Ada	1.19565e-170	0.565555	0.604	0.089	1.84525e-166	0
	Fen1	1.2078e-170	0.61055	0.679	0.125	1.86399e-166	0
	Lsm5	5.95204e-170	0.823821	0.954	0.664	9.18578e-166	0
	Cdkn2c	5.6918e-169	0.714189	0.667	0.124	8.78416e-165	0
	E2f8	5.71796e-169	0.535028	0.524	0.057	8.82453e-165	0
	Brca1	3.90024e-168	0.434702	0.452	0.033	6.01924e-164	0
	Asf1a	4.93953e-168	0.676886	0.733	0.164	7.62317e-164	0
	Serbp1	6.46261e-168	0.806954	1	0.982	9.97375e-164	0
	Cep55	1.56458e-167	0.440798	0.438	0.029	2.41462e-163	0
	Lck	2.74265e-167	0.948576	0.962	0.567	4.23273e-163	0
	Maz	2.34147e-166	0.819796	0.954	0.635	3.61359e-162	0
	Hnrnpu	2.6306e-166	0.81811	1	0.957	4.05981e-162	0
	Hpf1	6.94718e-166	0.894787	0.918	0.466	1.07216e-161	0
	Rmi2	6.47364e-165	0.522929	0.558	0.072	9.99077e-161	0
	Mcm10	9.90682e-165	0.374123	0.41	0.023	1.52892e-160	0
	Ube2t	1.22727e-164	0.585569	0.604	0.094	1.89405e-160	0
	Pcna	4.86087e-164	1.25087	0.92	0.591	7.50178e-160	0
	Smc3	5.42803e-164	0.824963	0.962	0.672	8.37708e-160	0
	Abhd8	1.61434e-163	0.595373	0.671	0.126	2.49141e-159	0
	Mybl2	4.9713e-163	0.394029	0.404	0.023	7.67221e-159	0
	Mrpl58	7.11075e-163	0.829854	0.908	0.416	1.0974e-158	0
	Smc1a	8.28618e-163	0.805249	0.976	0.751	1.27881e-158	0
	Rps17	1.47259e-162	0.743191	1	0.99	2.27264e-158	0
	Slc16a1	1.52699e-162	0.577905	0.62	0.098	2.3566e-158	0
	Hnrnpa0	1.424e-161	0.682554	1	0.971	2.19765e-157	0
	Hdgf	3.22163e-161	0.820206	0.968	0.75	4.97194e-157	0
	Anp32a	8.65026e-161	0.740684	0.996	0.902	1.33499e-156	0
	Hist1h4h	9.73235e-161	0.649488	0.62	0.107	1.50199e-156	0
	Galk1	1.31826e-160	0.609563	0.689	0.142	2.03446e-156	0
	Depdc1a	1.59478e-160	0.459307	0.412	0.026	2.46123e-156	0
	Ccnf	2.16574e-160	0.495381	0.452	0.038	3.34239e-156	0
	Rpl28	2.57046e-160	0.619726	1	1	3.967e-156	0
	Ranbp1	6.32514e-160	1.023	0.972	0.836	9.76159e-156	0
	Arpp21	7.87139e-160	1.07392	0.904	0.459	1.21479e-155	0
	Cdca2	1.02179e-159	0.431431	0.406	0.025	1.57693e-155	0
	Atp5j	1.59206e-159	0.684207	1	0.967	2.45703e-155	0
	Lsm8	3.86685e-159	0.755185	0.892	0.385	5.96771e-155	0
	Anapc5	8.64322e-159	0.790789	0.956	0.63	1.33391e-154	0
	Nebl	1.08363e-158	0.680278	0.679	0.141	1.67237e-154	0
	Stil	1.78462e-158	0.361802	0.371	0.016	2.75421e-154	0
	Rbbp4	8.759e-158	0.82029	0.956	0.662	1.35178e-153	0
	Ttk	1.23593e-157	0.361132	0.359	0.014	1.90742e-153	0
	Lsm4	1.36231e-156	0.770141	0.99	0.844	2.10245e-152	0
	Ncl	1.49348e-156	0.90977	1	0.968	2.30489e-152	0
	Fxn	4.49812e-156	0.562457	0.612	0.107	6.94195e-152	0
	Rbbp7	2.40708e-155	0.861797	0.904	0.427	3.71484e-151	0
	Smarcc1	3.24926e-155	0.846758	0.892	0.387	5.01458e-151	0
	Cdkn3	3.6591e-155	0.492116	0.434	0.035	5.6471e-151	0
	Ckap2	4.51335e-155	0.470473	0.448	0.039	6.96545e-151	0
	Slbp	2.13034e-154	1.08681	0.92	0.587	3.28775e-150	0
	Aqp11	5.82998e-154	0.767564	0.795	0.212	8.99741e-150	0
	Nt5dc2	3.58475e-153	0.627907	0.697	0.15	5.53234e-149	0
	Nedd4	4.92104e-153	0.673876	0.741	0.179	7.59464e-149	0
	Thoc7	6.37806e-153	0.779866	0.948	0.671	9.84326e-149	0
	Kifc1	9.76618e-153	0.425343	0.428	0.034	1.50721e-148	0
	Supt16	1.35601e-152	0.768536	0.976	0.746	2.09274e-148	0
	Rbm3	4.16577e-152	0.698845	0.998	0.955	6.42903e-148	0
	Cox7a2	4.42722e-152	0.643925	0.998	0.981	6.83252e-148	0
	Mms22l	1.40565e-151	0.476923	0.54	0.074	2.16934e-147	0
	Msh2	1.61969e-151	0.592429	0.659	0.135	2.49966e-147	0
	Psmc3ip	3.04791e-151	0.416269	0.464	0.047	4.70384e-147	0
	Atp5g3	5.35821e-151	0.739418	0.984	0.882	8.26933e-147	0
	Tubb4b	1.69852e-150	1.19961	0.928	0.634	2.62133e-146	0
	Dnph1	1.82047e-150	0.413709	0.43	0.036	2.80952e-146	0
	Trim59	2.64449e-150	0.624232	0.697	0.155	4.08125e-146	0
	Nap1l1	1.19179e-149	0.790118	0.986	0.916	1.83929e-145	0
	Tcf19	3.78359e-149	0.439576	0.414	0.033	5.83921e-145	0
	Gzma	9.97874e-149	1.26001	0.675	0.143	1.54002e-144	0
	Bex3	1.00187e-148	0.699956	0.855	0.295	1.54618e-144	0
	Dctpp1	1.2405e-148	0.956635	0.803	0.284	1.91447e-144	0
	Rpl15	1.49455e-148	0.654134	1	0.998	2.30654e-144	0
	Hist2h2ac	4.17782e-148	0.639257	0.504	0.068	6.44763e-144	0
	Ndufa4	4.92928e-148	0.655805	0.998	0.977	7.60735e-144	0
	Kif20a	6.4288e-148	0.369453	0.382	0.024	9.92157e-144	0
	Cd3d	1.18161e-147	1.03133	0.926	0.606	1.82358e-143	0
	Ckap5	1.39542e-147	0.776718	0.719	0.193	2.15355e-143	0
	Ska2	6.77522e-147	0.437348	0.436	0.04	1.04562e-142	0
	Mcm4	2.14027e-146	0.716974	0.687	0.165	3.30308e-142	0
	Exo1	4.40891e-146	0.339036	0.349	0.016	6.80428e-142	0
	2610318N02Rik	4.80653e-146	0.382564	0.371	0.022	7.41792e-142	0
	Cd3e	7.34244e-146	0.880227	0.926	0.503	1.13316e-141	0
	Nek2	8.23541e-146	0.386845	0.361	0.019	1.27097e-141	0
	Magoh	3.20669e-145	0.72899	0.954	0.698	4.94889e-141	0
	Ppp1cc	6.02844e-145	0.691916	0.966	0.734	9.3037e-141	0
	Tubg1	9.66906e-144	0.479999	0.562	0.092	1.49223e-139	0
	Bora	3.28353e-143	0.499859	0.518	0.073	5.06748e-139	0
	Cenpn	6.77086e-143	0.37967	0.404	0.033	1.04495e-138	0
	Pnn	7.42168e-143	0.823011	0.98	0.775	1.14539e-138	0
	Hnrnpd	1.11072e-142	0.797875	0.976	0.87	1.71418e-138	0
	Nudt1	5.27899e-142	0.48234	0.554	0.091	8.14706e-138	0
	Exosc8	2.83549e-141	0.702056	0.859	0.368	4.37601e-137	0
	Metap2	3.40805e-141	0.737737	0.992	0.885	5.25965e-137	0
	Hnrnpf	3.66845e-141	0.62498	0.998	0.975	5.66152e-137	0
	Banf1	1.26229e-140	0.778738	0.932	0.585	1.9481e-136	0
	Kif18b	1.82914e-140	0.351746	0.351	0.019	2.82291e-136	0
	Pimreg	4.61537e-140	0.437766	0.357	0.021	7.12289e-136	0
	Hist1h2bm	6.85732e-140	0.327737	0.333	0.015	1.05829e-135	0
	Bcl11b	3.58497e-139	1.01434	0.89	0.488	5.53268e-135	0
	Hint1	4.48927e-139	0.628707	1	0.978	6.92829e-135	0
	Nono	5.62446e-139	0.676433	0.972	0.791	8.68023e-135	0
	Spint2	8.54643e-139	0.782699	0.934	0.514	1.31897e-134	0
	Ddx39	2.6002e-138	0.734945	0.886	0.418	4.01289e-134	0
	Snrpd2	3.78835e-138	0.678354	0.99	0.9	5.84657e-134	0
	Oip5	4.6222e-138	0.281981	0.315	0.012	7.13344e-134	0
	Ppil1	2.31792e-137	0.521956	0.604	0.122	3.57724e-133	0
	Endou	8.09779e-137	0.948652	0.871	0.403	1.24973e-132	0
	Dpy30	9.45086e-137	0.658898	0.823	0.306	1.45855e-132	0
	Siva1	9.78575e-137	0.904132	0.904	0.561	1.51023e-132	0
	Lef1	1.09968e-136	0.69605	0.655	0.149	1.69714e-132	0
	Uqcr10	3.62348e-136	0.624367	0.998	0.942	5.59212e-132	0
	Prps2	1.57222e-135	0.624379	0.737	0.207	2.42641e-131	0
	Ptprcap	1.63315e-135	0.775448	0.976	0.725	2.52043e-131	0
	Nudt21	1.75416e-135	0.694075	0.94	0.596	2.70719e-131	0
	Rcc1	1.9456e-135	0.446857	0.51	0.076	3.00265e-131	0
	Ssna1	2.55946e-135	0.697168	0.89	0.444	3.95001e-131	0
	Dgcr6	5.20178e-135	0.604016	0.709	0.189	8.02791e-131	0
	Npm1	6.5792e-135	0.955968	1	0.992	1.01537e-130	0
	Kif14	9.87461e-135	0.327845	0.329	0.016	1.52395e-130	0
	Cd247	2.1056e-134	0.673182	0.773	0.225	3.24958e-130	0
	Trip13	2.2249e-134	0.364846	0.392	0.033	3.43369e-130	0
	Cdv3	2.86708e-134	0.765063	0.974	0.81	4.42477e-130	0
	Kntc1	9.85615e-134	0.312382	0.329	0.017	1.5211e-129	0
	Atp5o.1	1.088e-133	0.640577	0.99	0.883	1.67911e-129	0
	Nudt5	1.33646e-133	0.593495	0.741	0.218	2.06257e-129	0
	Atp5j2	2.12678e-133	0.557216	1	0.989	3.28225e-129	0
	Anln	4.18353e-133	0.366083	0.394	0.034	6.45644e-129	0
	Trim37	4.78707e-133	0.40087	0.486	0.066	7.38789e-129	0
	Set	6.27061e-133	0.785437	0.994	0.936	9.67743e-129	0
	Rplp0	7.70791e-133	0.588245	1	1	1.18956e-128	0
	Ptcra	4.99208e-132	0.437828	0.402	0.038	7.70428e-128	0
	Chaf1b	5.16318e-132	0.472493	0.472	0.063	7.96834e-128	0
	Cks2	1.36804e-131	1.06798	0.88	0.508	2.11129e-127	0
	Rgcc	1.94783e-131	0.992723	0.894	0.504	3.00609e-127	0
	Ticrr	3.64035e-131	0.320473	0.347	0.023	5.61816e-127	0
	Zfpm1	4.87235e-131	0.408285	0.48	0.066	7.5195e-127	0
	Cdc7	5.88029e-131	0.403779	0.456	0.057	9.07506e-127	0
	Atp5g2	7.49321e-131	0.572925	1	0.981	1.15643e-126	0
	Strbp	9.63297e-131	0.661845	0.785	0.261	1.48666e-126	0
	Ybx1	1.9155e-130	0.659574	1	0.995	2.95619e-126	0
	Tex30	2.49989e-130	0.478171	0.631	0.138	3.85807e-126	0
	Ywhae	6.06736e-130	0.617864	0.996	0.958	9.36375e-126	0
	Emg1	3.05308e-129	0.617025	0.97	0.794	4.71182e-125	0
	Snrpb	3.90442e-129	0.600617	0.988	0.948	6.0257e-125	0
	Rif1	8.83362e-129	0.690278	0.735	0.227	1.36329e-124	0
	Metrn	1.06627e-128	0.442234	0.51	0.082	1.64558e-124	0
	Cdk4	1.24774e-128	0.881441	0.873	0.501	1.92564e-124	0
	Cox6c	3.91886e-128	0.546913	1	0.994	6.04798e-124	0
	Srsf2	5.40629e-128	0.670635	0.986	0.923	8.34353e-124	0
	Cep57	1.10842e-127	0.556583	0.705	0.196	1.71063e-123	0
	Kif18a	1.83137e-127	0.425794	0.454	0.059	2.82635e-123	0
	U2af1	4.04036e-127	0.682786	0.956	0.781	6.23549e-123	0
	Arhgap19	5.92605e-127	0.464805	0.43	0.052	9.14567e-123	0
	Chek1	1.79688e-126	0.339684	0.357	0.028	2.77312e-122	0
	Brip1	2.05145e-126	0.352447	0.359	0.029	3.16601e-122	0
	Lrr1	3.35351e-126	0.301411	0.299	0.013	5.17547e-122	0
	Elob	6.82825e-126	0.520901	0.998	0.985	1.0538e-121	0
	Phf5a	8.94454e-126	0.643382	0.94	0.646	1.38041e-121	0
	Bard1	1.01623e-125	0.33127	0.349	0.026	1.56835e-121	0
	Samd1	1.31798e-125	0.734226	0.757	0.26	2.03404e-121	0
	Smarca5	1.44166e-125	0.64092	0.98	0.847	2.22492e-121	0
	Kif23	1.26534e-124	0.601535	0.633	0.148	1.95279e-120	0
	Trim28	2.09197e-124	0.643963	0.811	0.31	3.22854e-120	0
	Melk	3.62387e-124	0.308018	0.345	0.025	5.59272e-120	0
	Ptpn7	5.65165e-124	0.575514	0.733	0.217	8.72219e-120	0
	Cyb5a	5.87354e-124	0.881867	0.94	0.82	9.06463e-120	0
	Suz12	8.23344e-124	0.682672	0.861	0.378	1.27067e-119	0
	4930579G24Rik	2.50252e-123	0.327455	0.384	0.038	3.86214e-119	0
	Rhoh	6.21933e-123	0.765332	0.964	0.728	9.5983e-119	0
	Nol7	7.3273e-123	0.576176	0.992	0.886	1.13082e-118	0
	Timeless	7.49323e-123	0.428904	0.466	0.068	1.15643e-118	0
	Wdhd1	8.40466e-123	0.40951	0.49	0.077	1.29709e-118	0
	Ndufab1	1.85867e-122	0.695041	0.95	0.771	2.86849e-118	0
	Nsmce4a	2.56387e-122	0.638808	0.922	0.626	3.95681e-118	0
	Hsp90aa1	4.32433e-122	0.785189	0.996	0.974	6.67374e-118	0
	Rangap1	5.76153e-122	0.560999	0.707	0.204	8.89176e-118	0
	Rhno1	6.21556e-122	0.443028	0.586	0.124	9.59248e-118	0
	Lyar	7.36327e-122	0.682292	0.737	0.239	1.13637e-117	0
	Gm37065	8.49599e-122	0.477342	0.544	0.104	1.31119e-117	0
	Bcl7a	1.13177e-121	0.454749	0.538	0.103	1.74666e-117	0
	Rps16	1.2285e-121	0.465893	1	1	1.89594e-117	0
	Casp8ap2	1.37457e-121	0.630277	0.769	0.261	2.12138e-117	0
	Pa2g4	4.25441e-121	0.809184	0.902	0.594	6.56583e-117	0
	Poc1a	5.43524e-121	0.303517	0.349	0.029	8.38821e-117	0
	Bcl7c	1.10479e-120	0.663903	0.892	0.528	1.70502e-116	0
	Brca2	1.30026e-120	0.390591	0.402	0.046	2.00669e-116	0
	Vdac1	1.62289e-120	0.64348	0.938	0.714	2.50461e-116	0
	Raly	1.67066e-120	0.601775	0.972	0.833	2.57834e-116	0
	Eif1ax	3.356e-120	0.636389	0.93	0.65	5.17932e-116	0
	Hnrnpa2b1	3.76597e-120	0.611083	1	0.973	5.81202e-116	0
	Impdh1	5.1925e-120	0.491629	0.576	0.125	8.01359e-116	0
	Hist1h4i	5.52269e-120	0.554992	0.681	0.191	8.52317e-116	0
	Ldhb	3.0995e-119	0.794123	0.815	0.327	4.78346e-115	0
	Ssbp3	3.30396e-119	0.56466	0.755	0.243	5.099e-115	0
	Gapdh	3.47875e-119	0.569269	1	0.994	5.36876e-115	0
	Spdl1	3.98321e-119	0.399369	0.406	0.049	6.14729e-115	0
	Mdh1	5.67184e-119	0.604118	0.96	0.772	8.75335e-115	0
	Csrp1	6.7342e-119	0.576243	0.821	0.315	1.03929e-114	0
	Srsf7	8.39753e-119	0.71136	0.934	0.772	1.29599e-114	0
	Rpsa	1.13287e-118	0.535076	1	0.999	1.74835e-114	0
	Zfp367	1.85174e-118	0.385064	0.424	0.055	2.85779e-114	0
	Prim2	3.27206e-118	0.409006	0.484	0.08	5.04977e-114	0
	Atp5k	3.37263e-118	0.563008	1	0.959	5.20498e-114	0
	Rpl4	4.3851e-118	0.56367	1	0.992	6.76752e-114	0
	Hist2h2bb	4.5431e-118	0.328948	0.325	0.024	7.01137e-114	0
	Cdc25a	6.12064e-118	0.421499	0.48	0.079	9.44599e-114	0
	Zwilch	2.22963e-117	0.291204	0.313	0.021	3.44099e-113	0
	Trat1	2.819e-117	0.585602	0.653	0.169	4.35056e-113	0
	Rad21	4.30129e-117	0.759191	0.859	0.443	6.63818e-113	0
	Naca	4.46616e-117	0.537714	1	0.997	6.89262e-113	0
	Lrrc42	5.12472e-117	0.520267	0.629	0.161	7.90897e-113	0
	Smo	7.27961e-117	0.426989	0.474	0.076	1.12346e-112	0
	Ndufs5	9.69172e-117	0.557488	0.982	0.881	1.49572e-112	0
	Hmga1	1.038e-116	0.498132	0.622	0.155	1.60195e-112	0
	Blm	1.30807e-116	0.386744	0.446	0.064	2.01875e-112	0
	Hist1h3e	1.56894e-116	0.455769	0.456	0.071	2.42135e-112	0
	Pole3	2.66112e-116	0.500184	0.622	0.161	4.10691e-112	0
	Larp7	3.59288e-116	0.603982	0.761	0.257	5.54489e-112	0
	Rpl36a	5.04966e-116	0.609623	1	0.995	7.79314e-112	0
	Cenpq	5.31672e-116	0.441487	0.602	0.139	8.20529e-112	0
	Rpl29	8.14205e-116	0.54785	1	0.997	1.25656e-111	0
	Nudc	1.0988e-115	0.703806	0.934	0.744	1.69578e-111	0
	Arhgap11a	1.38893e-115	0.486618	0.57	0.124	2.14353e-111	0
	Cox7c	2.18537e-115	0.467065	1	0.998	3.37268e-111	0
	Ets1	2.93643e-115	0.677807	0.972	0.728	4.5318e-111	0
	Rps20	3.03128e-115	0.529275	1	1	4.67817e-111	0
	Snrnp25	4.29495e-115	0.479433	0.641	0.167	6.6284e-111	0
	Rdx	1.10288e-114	0.612546	0.944	0.687	1.70207e-110	0
	Msh6	1.2447e-114	0.523548	0.602	0.148	1.92095e-110	0
	Eef1b2	1.81176e-114	0.596174	1	0.994	2.7961e-110	0
	Rpa1	3.98278e-114	0.50206	0.643	0.169	6.14662e-110	0
	Snrpa1	8.29096e-114	0.643652	0.835	0.395	1.27954e-109	0
	Oaz1	9.81829e-114	0.429687	1	1	1.51526e-109	0
	Rpl31	1.07812e-113	0.530848	0.998	0.988	1.66387e-109	0
	Ndufa5	1.44731e-113	0.593999	0.946	0.72	2.23364e-109	0
	Lmnb1	3.60993e-113	0.68236	0.954	0.644	5.57121e-109	0
	Uchl5	5.13766e-113	0.645054	0.795	0.334	7.92895e-109	0
	Myb	5.56432e-113	0.726654	0.916	0.526	8.58742e-109	0
	Gimap9	7.44073e-113	0.588606	0.679	0.194	1.14833e-108	0
	Dscc1	9.63275e-113	0.280044	0.303	0.02	1.48662e-108	0
	Ddx39b	9.84e-113	0.588416	0.958	0.806	1.51861e-108	0
	Mrpl51	1.67508e-112	0.6225	0.892	0.492	2.58516e-108	0
	Aes	3.57756e-112	0.593739	1	0.948	5.52125e-108	0
	Ssrp1	4.09891e-112	0.619894	0.865	0.421	6.32585e-108	0
	Syt13	1.71059e-111	0.467491	0.498	0.094	2.63995e-107	0
	Cops3	3.42225e-111	0.537023	0.699	0.218	5.28155e-107	0
	Impa2	4.21055e-111	0.428745	0.558	0.124	6.49815e-107	0
	Rad54l	9.63925e-111	0.313043	0.337	0.031	1.48763e-106	0
	Bzw2	1.0952e-110	0.601936	0.705	0.227	1.69022e-106	0
	Cdk2	1.10864e-110	0.447193	0.544	0.115	1.71096e-106	0
	Ccne1	3.00879e-110	0.355431	0.335	0.031	4.64347e-106	0
	Hdac2	3.62717e-110	0.54947	0.727	0.245	5.59781e-106	0
	Park7	5.7956e-110	0.610713	0.986	0.915	8.94434e-106	0
	Haus1	9.08501e-110	0.341849	0.438	0.067	1.40209e-105	0
	Zfp422	1.77262e-109	0.487392	0.604	0.154	2.73568e-105	0
	Ikzf2	1.93276e-109	0.590064	0.604	0.153	2.98283e-105	0
	Pold2	3.1892e-109	0.39242	0.46	0.078	4.9219e-105	0
	Eny2	3.38671e-109	0.598265	0.91	0.562	5.2267e-105	0
	Ddah2	4.36668e-109	0.406443	0.43	0.065	6.7391e-105	0
	Tomm7	9.57811e-109	0.491159	1	0.986	1.47819e-104	0
	Rps26	1.13018e-108	0.563261	1	0.999	1.74421e-104	0
	Uba2	1.35533e-108	0.587534	0.829	0.374	2.09167e-104	0
	Fam216a	2.01442e-108	0.342735	0.428	0.065	3.10886e-104	0
	Pla2g12a	2.3504e-108	0.421991	0.514	0.104	3.62737e-104	0
	Hnrnpk	5.21693e-108	0.475458	0.998	0.979	8.05129e-104	0
	Nfyb	8.01519e-108	0.548933	0.653	0.193	1.23698e-103	0
	Rcc2	1.66525e-107	0.619632	0.894	0.51	2.56998e-103	0
	Hnrnpr	2.35493e-107	0.64591	0.873	0.505	3.63437e-103	0
	Asrgl1	2.89723e-107	0.408137	0.514	0.105	4.4713e-103	0
	Cox8a	2.95808e-107	0.447298	1	0.997	4.56521e-103	0
	Skp1a	3.08693e-107	0.653136	0.88	0.542	4.76406e-103	0
	Rpl3	5.62803e-107	0.562892	1	0.997	8.68573e-103	0
	Cdca4	6.95831e-107	0.384317	0.47	0.084	1.07388e-102	0
	Bola3	1.37761e-106	0.518552	0.775	0.28	2.12607e-102	0
	Nup62	1.85676e-106	0.451591	0.554	0.129	2.86554e-102	0
	Prps1	2.05087e-106	0.400192	0.534	0.115	3.16512e-102	0
	Cisd1	2.49054e-106	0.572102	0.777	0.299	3.84365e-102	0
	Rfc1	2.64033e-106	0.701329	0.829	0.414	4.07481e-102	0
	Pkmyt1	3.37409e-106	0.352882	0.41	0.059	5.20723e-102	0
	2010107E04Rik	8.37638e-106	0.504609	0.998	0.971	1.29273e-101	0
	Tcof1	1.6902e-105	0.64382	0.878	0.558	2.60849e-101	0
	Mtf2	1.94144e-105	0.589943	0.673	0.21	2.99622e-101	0
	Ubap2	2.12227e-105	0.506709	0.633	0.182	3.2753e-101	0
	Nop10	2.99564e-105	0.688789	0.956	0.847	4.62316e-101	0
	H2-Q2	3.47448e-105	0.463512	0.444	0.077	5.36216e-101	0
	Eif3h	4.96144e-105	0.497288	0.996	0.961	7.65699e-101	0
	Cox5a	5.1507e-105	0.522397	0.998	0.971	7.94908e-101	0
	Atp5b	7.39366e-105	0.566382	0.998	0.971	1.14106e-100	0
	Myef2	1.81779e-104	0.561963	0.633	0.185	2.8054e-100	0
	Minos1	2.58974e-104	0.52603	0.986	0.897	3.99674e-100	0
	Rpl14	3.08347e-104	0.584991	1	0.996	4.75872e-100	0
	Srsf10	4.35339e-104	0.580647	0.938	0.739	6.71859e-100	0
	Rps10	6.56139e-104	0.422906	1	1	1.01262e-99	0
	Pmf1	6.93609e-104	0.483947	0.677	0.203	1.07045e-99	0
	Ccp110	9.75824e-104	0.334216	0.357	0.042	1.50599e-99	0
	Nudcd2	1.05735e-103	0.523967	0.671	0.212	1.63181e-99	0
	Rpl11	1.11255e-103	0.446778	1	1	1.717e-99	0
	Ndufb11	1.4961e-103	0.488842	0.994	0.939	2.30894e-99	0
	Rpl22	2.13642e-103	0.474331	1	0.997	3.29714e-99	0
	Atpif1	2.63991e-103	0.572937	0.992	0.939	4.07417e-99	0
	Fkbp3	4.633e-103	0.670961	0.906	0.631	7.15011e-99	0
	Ctps	1.12941e-102	0.327309	0.371	0.048	1.74302e-98	0
	Nxt1	1.57394e-102	0.481257	0.633	0.184	2.42906e-98	0
	Kpna2	1.70263e-102	0.668167	0.57	0.155	2.62767e-98	0
	Rcbtb2	2.64182e-102	0.590667	0.735	0.269	4.07713e-98	0
	Hist1h2bn	3.00537e-102	0.285077	0.279	0.019	4.63819e-98	0
	Pold3	4.07467e-102	0.493824	0.618	0.173	6.28844e-98	0
	Mrpl13	5.60212e-102	0.498646	0.743	0.269	8.64575e-98	0
	Hat1	6.35397e-102	0.565692	0.761	0.293	9.80609e-98	0
	Actl6a	8.50293e-102	0.571249	0.823	0.387	1.31226e-97	0
	Rad18	9.16288e-102	0.360391	0.43	0.072	1.41411e-97	0
	Slc25a5	9.27889e-102	0.529967	0.996	0.963	1.43201e-97	0
	Rnps1	1.02598e-101	0.536663	0.751	0.283	1.58339e-97	0
	Enkd1	1.18763e-101	0.275105	0.325	0.033	1.83287e-97	0
	Ndufs6	1.60031e-101	0.528962	0.96	0.81	2.46975e-97	0
	Ift80	2.34359e-101	0.359377	0.454	0.081	3.61686e-97	0
	Ilf2	6.9242e-101	0.582913	0.843	0.426	1.06861e-96	0
	Fam92a	1.02362e-100	0.353928	0.414	0.066	1.57975e-96	0
	Lage3	1.02516e-100	0.487913	0.721	0.256	1.58213e-96	0
	Gm42047	1.46127e-100	0.681843	0.552	0.137	2.25518e-96	0
	Cstf2	1.64846e-100	0.415753	0.548	0.132	2.54407e-96	0
	Hdac1	1.9962e-100	0.589926	0.863	0.481	3.08074e-96	0
	Ska3	2.66261e-100	0.250461	0.267	0.017	4.10921e-96	0
	Cntrob	3.12089e-100	0.323263	0.378	0.052	4.81648e-96	0
	Rps3a1	4.11635e-100	0.437066	1	1	6.35276e-96	0
	Srsf1	4.31867e-100	0.573501	0.916	0.572	6.665e-96	0
	Rpl10a	8.0618e-100	0.536673	1	0.996	1.24418e-95	0
	Znhit3	1.35311e-99	0.3903	0.542	0.129	2.08826e-95	0
	Itgb3bp	1.44071e-99	0.338904	0.416	0.068	2.22345e-95	0
	Agfg2	2.02334e-99	0.555975	0.679	0.215	3.12262e-95	0
	Swi5	2.22429e-99	0.559314	0.956	0.809	3.43275e-95	0
	Gm525	3.06153e-99	0.428707	0.444	0.078	4.72486e-95	0
	E2f7	3.47038e-99	0.274254	0.269	0.018	5.35584e-95	0
	Impdh2	3.87652e-99	0.628956	0.805	0.382	5.98264e-95	0
	Tcf3	4.38057e-99	0.491474	0.711	0.247	6.76054e-95	0
	Rbl1	5.84123e-99	0.429511	0.53	0.125	9.01477e-95	0
	Glo1	8.08798e-99	0.518129	0.745	0.289	1.24822e-94	0
	Fkbp5	1.6001e-98	0.652487	0.809	0.373	2.46944e-94	0
	Ilf3	1.97134e-98	0.489698	0.697	0.233	3.04238e-94	0
	Ube2i	1.99188e-98	0.511763	0.982	0.896	3.07406e-94	0
	Lbr	3.29811e-98	0.6178	0.956	0.687	5.08998e-94	0
	Eif5a	3.50705e-98	0.67568	0.998	0.982	5.41242e-94	0
	Fcho1	4.84292e-98	0.441976	0.568	0.149	7.47408e-94	0
	Ercc6l	5.86085e-98	0.297427	0.329	0.037	9.04505e-94	0
	Tceal9	1.54032e-97	0.523401	0.757	0.286	2.37718e-93	0
	Tmem121	1.83322e-97	0.276411	0.263	0.017	2.8292e-93	0
	Bhlhb9	1.90827e-97	0.337968	0.4	0.063	2.94503e-93	0
	Tfam	2.40145e-97	0.466371	0.624	0.187	3.70616e-93	0
	Prmt1	2.65959e-97	0.635957	0.849	0.464	4.10454e-93	0
	Traip	3.06133e-97	0.256441	0.287	0.024	4.72455e-93	0
	Rfc2	3.22502e-97	0.562439	0.757	0.307	4.97717e-93	0
	Sla2	3.34363e-97	0.461748	0.544	0.135	5.16022e-93	0
	Cdt1	3.52395e-97	0.471268	0.546	0.136	5.43852e-93	0
	Ramp1	5.59259e-97	0.5921	0.942	0.746	8.63105e-93	0
	Dap3	6.96614e-97	0.535827	0.783	0.328	1.07508e-92	0
	Chchd3	1.01584e-96	0.656176	0.787	0.388	1.56775e-92	0
	Tdrkh	1.29833e-96	0.334845	0.382	0.057	2.00372e-92	0
	Rpl41	2.63989e-96	0.449999	1	1	4.07414e-92	0
	Hist1h2bb	3.46263e-96	0.283371	0.297	0.028	5.34388e-92	0
	Cdk5rap2	3.65951e-96	0.444719	0.498	0.113	5.64771e-92	0
	Gins1	3.98843e-96	0.271494	0.307	0.031	6.15535e-92	0
	Satb1	4.25412e-96	0.822472	0.956	0.75	6.56539e-92	0
	Ttf2	4.39858e-96	0.332946	0.394	0.062	6.78833e-92	0
	Pin1	5.11668e-96	0.54639	0.805	0.391	7.89657e-92	0
	Pmm1	5.12882e-96	0.430481	0.554	0.143	7.9153e-92	0
	Eri1	5.48635e-96	0.555673	0.715	0.271	8.46708e-92	0
	Fmr1	6.1756e-96	0.517492	0.715	0.256	9.5308e-92	0
	Mbnl3	8.39559e-96	0.331457	0.406	0.067	1.29569e-91	0
	Naa10	1.05826e-95	0.503364	0.669	0.222	1.63321e-91	0
	Rpl32	1.9453e-95	0.465877	1	0.999	3.00219e-91	0
	Dynlt1f	2.40254e-95	0.547574	0.759	0.31	3.70784e-91	0
	Paics	2.76515e-95	0.612036	0.759	0.326	4.26745e-91	0
	Snrpd3	3.41753e-95	0.588157	0.936	0.802	5.27428e-91	0
	Rfwd3	3.45507e-95	0.398433	0.526	0.126	5.33221e-91	0
	Rps14	3.58735e-95	0.418078	1	1	5.53635e-91	0
	Cnot6	4.655e-95	0.567249	0.831	0.414	7.18406e-91	0
	Cdk2ap1	6.8424e-95	0.580131	0.867	0.532	1.05599e-90	0
	Hist1h1e	8.69172e-95	0.919551	0.813	0.494	1.34139e-90	0
	Ap3s1	1.1669e-94	0.68065	0.888	0.642	1.80088e-90	0
	Socs1	1.45269e-94	0.588516	0.693	0.243	2.24193e-90	0
	Psma6	2.16501e-94	0.528066	0.95	0.786	3.34125e-90	0
	Suv39h1	3.43223e-94	0.312478	0.412	0.069	5.29696e-90	0
	Gtf2a2	1.3799e-93	0.529048	0.906	0.641	2.12959e-89	0
	Ift27	1.70911e-93	0.388226	0.494	0.112	2.63768e-89	0
	Mylpf	2.2636e-93	0.319609	0.388	0.061	3.49342e-89	0
	Ddx1	3.00045e-93	0.470526	0.671	0.226	4.63059e-89	0
	Tmem263	6.29268e-93	0.346393	0.45	0.088	9.71149e-89	0
	Sf3a3	6.91422e-93	0.487614	0.745	0.294	1.06707e-88	0
	Snrnp40	8.42373e-93	0.499929	0.765	0.313	1.30003e-88	0
	Mrps26	1.25954e-92	0.478986	0.793	0.323	1.94385e-88	0
	Prss57	1.76547e-92	0.28437	0.299	0.03	2.72464e-88	0
	Ndufc1	2.52986e-92	0.51863	0.968	0.868	3.90433e-88	0
	Chchd2	3.76435e-92	0.409939	1	0.997	5.80952e-88	0
	Mrps36	4.30571e-92	0.549652	0.855	0.453	6.645e-88	0
	Hist1h1d	4.70944e-92	0.543729	0.548	0.148	7.26808e-88	0
	Fkbp4	8.35765e-92	0.652775	0.839	0.499	1.28984e-87	0
	Mrpl41	1.22566e-91	0.502911	0.709	0.271	1.89156e-87	0
	Bub3	1.36039e-91	0.67048	0.878	0.607	2.09948e-87	0
	Camk4	1.57639e-91	0.540035	0.673	0.218	2.43284e-87	0
	Smc6	1.6619e-91	0.583317	0.92	0.708	2.5648e-87	0
	Nsmce1	1.85254e-91	0.579776	0.763	0.343	2.85903e-87	0
	Ppat	2.07512e-91	0.394284	0.46	0.097	3.20253e-87	0
	Colq	3.02023e-91	0.34799	0.412	0.074	4.66112e-87	0
	Rpl12	4.11414e-91	0.541405	0.998	0.993	6.34936e-87	0
	Psph	4.99304e-91	0.370589	0.524	0.13	7.70576e-87	0
	Upf3b	5.18182e-91	0.441159	0.699	0.243	7.9971e-87	0
	Ruvbl1	7.76429e-91	0.4859	0.629	0.205	1.19826e-86	0
	Cenpl	1.16868e-90	0.380874	0.42	0.08	1.80363e-86	0
	Rps6	1.24879e-90	0.50509	0.998	0.997	1.92726e-86	0
	Ssbp2	2.04054e-90	0.567009	0.763	0.311	3.14917e-86	0
	Cd8a	2.30934e-90	1.12239	0.795	0.588	3.56401e-86	0
	Pdcd5	2.95053e-90	0.511351	0.946	0.825	4.55355e-86	0
	Ctdspl2	3.44879e-90	0.479257	0.653	0.222	5.32251e-86	0
	Mdm1	4.64126e-90	0.327808	0.402	0.07	7.16286e-86	0
	Rdm1	5.17782e-90	0.417079	0.524	0.133	7.99093e-86	0
	Calm2	1.255e-89	0.636721	0.996	0.97	1.93684e-85	0
	Arsi	1.79766e-89	0.343237	0.305	0.035	2.77432e-85	0
	Uchl3	2.208e-89	0.54069	0.769	0.337	3.4076e-85	0
	Rps3	2.47265e-89	0.400066	1	1	3.81604e-85	0
	Cox5b	2.72247e-89	0.454972	0.996	0.982	4.20159e-85	0
	Spats2	3.57686e-89	0.260558	0.265	0.022	5.52017e-85	0
	Rpl8	5.89722e-89	0.400121	1	0.999	9.10119e-85	0
	Hspb11	6.37281e-89	0.504198	0.709	0.266	9.83515e-85	0
	Rpl23a	8.34248e-89	0.490284	1	0.99	1.2875e-84	0
	Cct2	9.41371e-89	0.520257	0.978	0.894	1.45282e-84	0
	Nup37	1.05304e-88	0.321616	0.402	0.072	1.62516e-84	0
	Arpp19	2.32934e-88	0.462072	0.984	0.927	3.59487e-84	0
	Rplp2	2.38734e-88	0.311276	1	1	3.68439e-84	0
	Uba52	3.44859e-88	0.557691	1	0.995	5.32221e-84	0
	Ssb	3.48049e-88	0.484069	0.962	0.85	5.37144e-84	0
	Npm3	3.95481e-88	0.578802	0.767	0.356	6.10345e-84	0
	Cacybp	6.74029e-88	0.582268	0.916	0.701	1.04023e-83	0
	Haus3	7.46936e-88	0.423361	0.54	0.148	1.15275e-83	0
	Pds5b	9.76058e-88	0.45391	0.622	0.203	1.50635e-83	0
	Themis	1.77176e-87	0.557186	0.763	0.305	2.73436e-83	0
	Nde1	2.14934e-87	0.444216	0.546	0.152	3.31707e-83	0
	Cd8b1	2.80243e-87	1.04824	0.847	0.659	4.32499e-83	0
	Ndufa12	8.36883e-87	0.567867	0.902	0.694	1.29156e-82	0
	Mrps12	1.24489e-86	0.467693	0.727	0.287	1.92124e-82	0
	Polr2j	1.8762e-86	0.506607	0.906	0.616	2.89554e-82	0
	Dazap1	1.91373e-86	0.520321	0.835	0.455	2.95346e-82	0
	Gins4	1.94543e-86	0.426004	0.578	0.175	3.00238e-82	0
	Hprt	3.85916e-86	0.534157	0.894	0.662	5.95585e-82	0
	Akap12	3.98572e-86	0.404068	0.416	0.082	6.15117e-82	0
	Tdp2	6.66006e-86	0.392312	0.594	0.176	1.02785e-81	0
	Rpl7	7.37087e-86	0.363724	1	1	1.13755e-81	0
	Hikeshi	1.57802e-85	0.482517	0.747	0.32	2.43535e-81	0
	Psat1	1.88875e-85	0.332317	0.382	0.069	2.9149e-81	0
	Ncaph2	2.49096e-85	0.453972	0.703	0.262	3.84429e-81	0
	Zfp704	2.87488e-85	0.375863	0.488	0.116	4.4368e-81	0
	1190007I07Rik	3.35427e-85	0.396238	0.52	0.139	5.17664e-81	0
	Gmps	4.85048e-85	0.474124	0.709	0.275	7.48574e-81	0
	Cbx6	4.88571e-85	0.371421	0.488	0.117	7.54011e-81	0
	Isoc1	5.55392e-85	0.391167	0.588	0.179	8.57136e-81	0
	Phpt1	5.74648e-85	0.374308	0.488	0.122	8.86854e-81	0
	Rpl5	6.72714e-85	0.470521	1	0.996	1.0382e-80	0
	Hsp90ab1	9.41282e-85	0.569505	1	0.999	1.45268e-80	0
	Ints7	1.20387e-84	0.388813	0.506	0.132	1.85794e-80	0
	Psma2	1.32298e-84	0.448432	0.976	0.931	2.04175e-80	0
	Acot7	1.37953e-84	0.471383	0.582	0.185	2.12903e-80	0
	Rpl22l1	1.91618e-84	0.606594	0.99	0.967	2.95724e-80	0
	Ptprf	1.93535e-84	0.329001	0.442	0.093	2.98683e-80	0
	Rps15a	2.4881e-84	0.412347	1	0.999	3.83988e-80	0
	Stip1	3.42344e-84	0.52408	0.801	0.402	5.2834e-80	0
	Pole2	6.53861e-84	0.286093	0.325	0.046	1.0091e-79	0
	Txn1	7.02851e-84	0.384354	1	0.961	1.08471e-79	0
	Hist1h3f	1.06986e-83	0.280233	0.291	0.034	1.65111e-79	0
	Zeb1	2.31321e-83	0.457951	0.657	0.226	3.56998e-79	0
	Mrpl49	2.36357e-83	0.404359	0.548	0.16	3.6477e-79	0
	Slc43a3	3.43801e-83	0.254283	0.335	0.049	5.30588e-79	0
	Tcp1	4.33441e-83	0.507104	0.926	0.751	6.6893e-79	0
	Rpl13a	4.36135e-83	0.488345	0.99	0.928	6.73088e-79	0
	Calm3	5.84062e-83	0.491409	0.982	0.906	9.01383e-79	0
	Adgrl1	9.06432e-83	0.324977	0.376	0.066	1.3989e-78	0
	Cenpa	9.95536e-83	1.03481	0.801	0.513	1.53641e-78	0
	Ndufa11	1.74924e-82	0.430317	0.956	0.829	2.69961e-78	0
	Idh2	1.84504e-82	0.469493	0.687	0.259	2.84745e-78	0
	Myl10	2.13934e-82	0.538125	0.285	0.033	3.30164e-78	0
	Atp5a1	3.808e-82	0.424898	0.99	0.967	5.87688e-78	0
	Rad50	4.25911e-82	0.472742	0.663	0.239	6.57309e-78	0
	Zranb2	6.7133e-82	0.490024	0.898	0.591	1.03606e-77	0
	Elof1	1.05739e-81	0.505585	0.803	0.415	1.63186e-77	0
	Srrt	1.39759e-81	0.524963	0.839	0.485	2.1569e-77	0
	Uqcr11	1.50316e-81	0.478512	0.994	0.951	2.31982e-77	0
	Sf3b6	1.73001e-81	0.432802	0.978	0.898	2.66992e-77	0
	Mrps14	1.81327e-81	0.469709	0.952	0.828	2.79842e-77	0
	Cd28	2.08353e-81	0.540071	0.751	0.302	3.21551e-77	0
	Polr2d	2.27514e-81	0.356185	0.524	0.143	3.51122e-77	0
	Rps8	2.29004e-81	0.412625	1	1	3.53421e-77	0
	Dynll2	3.28251e-81	0.484708	0.669	0.249	5.06589e-77	0
	Gemin6	3.43078e-81	0.289822	0.394	0.076	5.29472e-77	0
	Tdp1	3.59639e-81	0.324482	0.4	0.08	5.5503e-77	0
	G2e3	5.246e-81	0.412062	0.458	0.11	8.09616e-77	0
	Rpl19	7.54769e-81	0.351745	1	1	1.16483e-76	0
	Rps13	1.15987e-80	0.359074	1	1	1.79002e-76	0
	Etaa1	1.18905e-80	0.333136	0.45	0.103	1.83506e-76	0
	Paip2	1.46803e-80	0.476777	0.962	0.854	2.2656e-76	0
	Rpl35	1.56174e-80	0.413514	1	0.999	2.41023e-76	0
	Rapgef3	1.77017e-80	0.427497	0.528	0.152	2.73191e-76	0
	Uck2	1.83843e-80	0.409119	0.576	0.175	2.83725e-76	0
	Gm8186	2.06692e-80	0.346342	0.508	0.137	3.18987e-76	0
	1110004E09Rik	2.5303e-80	0.316004	0.414	0.087	3.90501e-76	0
	Sae1	2.55496e-80	0.477195	0.747	0.338	3.94306e-76	0
	Ubr7	4.03346e-80	0.365674	0.482	0.124	6.22484e-76	0
	Exosc3	6.03813e-80	0.46627	0.751	0.343	9.31864e-76	0
	Polr3k	1.23633e-79	0.442141	0.631	0.231	1.90803e-75	0
	Rbmxl1	1.31781e-79	0.514242	0.755	0.354	2.03378e-75	0
	Nop58	1.6387e-79	0.601003	0.761	0.375	2.529e-75	0
	Fam83d	2.17009e-79	0.29543	0.291	0.038	3.3491e-75	0
	Mzt1	2.63352e-79	0.395302	0.602	0.199	4.06431e-75	0
	Skp2	3.46704e-79	0.285282	0.337	0.055	5.35068e-75	0
	Dgcr8	4.35718e-79	0.344214	0.444	0.103	6.72444e-75	0
	Hist1h3a	4.70731e-79	0.291735	0.333	0.053	7.26479e-75	0
	Nsg2	4.81319e-79	0.456939	0.566	0.171	7.4282e-75	0
	Pdap1	6.94855e-79	0.503516	0.912	0.708	1.07237e-74	0
	Baz1b	8.25067e-79	0.58107	0.857	0.539	1.27333e-74	0
	Cep57l1	8.4543e-79	0.301466	0.4	0.081	1.30475e-74	0
	Psmg1	9.30991e-79	0.380294	0.514	0.146	1.4368e-74	0
	Nup85	1.23919e-78	0.325957	0.44	0.102	1.91244e-74	0
	Kmt5a	1.71228e-78	0.53854	0.839	0.485	2.64256e-74	0
	Idh3a	2.11789e-78	0.411754	0.594	0.198	3.26854e-74	0
	Med30	4.04279e-78	0.507183	0.829	0.489	6.23924e-74	0
	Pola2	4.29088e-78	0.30163	0.38	0.074	6.62212e-74	0
	Alms1	6.69958e-78	0.2642	0.321	0.049	1.03395e-73	0
	Ppid	8.7668e-78	0.523399	0.675	0.272	1.35298e-73	0
	Fdps	9.4231e-78	0.432581	0.548	0.164	1.45427e-73	0
	Hspa14	9.60389e-78	0.493754	0.769	0.379	1.48217e-73	0
	Brd3	9.90111e-78	0.497277	0.713	0.3	1.52804e-73	0
	Terf1	1.12674e-77	0.390439	0.52	0.15	1.7389e-73	0
	Nrm	2.64401e-77	0.442544	0.637	0.228	4.0805e-73	0
	Acyp1	2.82062e-77	0.426344	0.582	0.192	4.35306e-73	0
	Pdxp	4.00085e-77	0.254011	0.283	0.036	6.17451e-73	0
	Atp5f1	5.6649e-77	0.405603	0.996	0.981	8.74264e-73	0
	Gata3	6.22064e-77	0.318937	0.436	0.097	9.60031e-73	0
	Mrpl34	6.79203e-77	0.515561	0.845	0.568	1.04821e-72	0
	Mrpl40	8.7185e-77	0.413059	0.663	0.25	1.34553e-72	0
	Sumo1	1.45526e-76	0.428832	0.962	0.859	2.2459e-72	0
	Thrap3	1.70233e-76	0.458189	0.936	0.767	2.62721e-72	0
	Nap1l4	2.14648e-76	0.469272	0.791	0.417	3.31266e-72	0
	Ptbp1	2.30221e-76	0.475567	0.869	0.533	3.55301e-72	0
	Apoo	2.51313e-76	0.277994	0.355	0.065	3.87851e-72	0
	Gadd45gip1	3.4309e-76	0.46955	0.723	0.318	5.2949e-72	0
	Rpp30	3.44912e-76	0.332857	0.49	0.132	5.32302e-72	0
	Rnf26	5.68828e-76	0.304747	0.404	0.088	8.77872e-72	0
	Ttc3	5.69106e-76	0.472823	0.687	0.27	8.78301e-72	0
	Rbmx	7.17262e-76	0.396531	0.572	0.187	1.10695e-71	0
	Prdx2	7.58217e-76	0.478684	0.97	0.885	1.17016e-71	0
	Rorc	9.75808e-76	0.362093	0.426	0.1	1.50597e-71	0
	Trbc1	1.68725e-75	1.54078	0.797	0.664	2.60394e-71	0
	Mrps33	1.79611e-75	0.432419	0.952	0.802	2.77193e-71	0
	Rpl7a	2.21398e-75	0.409738	1	0.998	3.41684e-71	0
	Dgke	2.76084e-75	0.407211	0.546	0.168	4.2608e-71	0
	Trp53i11	3.71114e-75	0.44874	0.681	0.258	5.7274e-71	0
	Rps4x	4.20147e-75	0.385799	1	0.999	6.48412e-71	0
	Gfi1	4.7256e-75	0.360599	0.436	0.105	7.29301e-71	0
	Snrpc	4.88385e-75	0.433921	0.926	0.723	7.53725e-71	0
	Sox4	5.07765e-75	0.61202	0.839	0.507	7.83634e-71	0
	Mrpl35	6.14225e-75	0.4104	0.687	0.276	9.47933e-71	0
	Bcas2	8.56985e-75	0.444518	0.91	0.683	1.32258e-70	0
	Pam16	9.63649e-75	0.463413	0.785	0.402	1.4872e-70	0
	Lrmp	1.18332e-74	0.533945	0.811	0.474	1.82622e-70	0
	Ezr	1.45365e-74	0.460344	0.99	0.886	2.24341e-70	0
	Nck2	1.74935e-74	0.331031	0.476	0.126	2.69977e-70	0
	Kpnb1	2.26004e-74	0.460345	0.713	0.303	3.48792e-70	0
	Cox20	2.28339e-74	0.508558	0.821	0.469	3.52395e-70	0
	Ube2e3	2.34519e-74	0.490373	0.813	0.437	3.61934e-70	0
	Cdc123	2.48525e-74	0.429875	0.695	0.287	3.83548e-70	0
	Umps	2.69098e-74	0.402883	0.518	0.157	4.15299e-70	0
	Hnrnpm	3.24231e-74	0.452593	0.988	0.886	5.00385e-70	0
	Rpl24	4.00755e-74	0.349688	1	1	6.18485e-70	0
	Pbdc1	6.75869e-74	0.467376	0.687	0.293	1.04307e-69	0
	Zfp664	1.1966e-73	0.390641	0.55	0.178	1.84671e-69	0
	Emc8	1.23334e-73	0.427275	0.695	0.289	1.90342e-69	0
	E2f3	1.33967e-73	0.306893	0.367	0.074	2.06751e-69	0
	Mphosph9	1.50023e-73	0.281249	0.396	0.084	2.3153e-69	0
	Mis18a	1.86631e-73	0.317985	0.48	0.129	2.88027e-69	0
	Nme1	1.93846e-73	0.609627	0.948	0.874	2.99162e-69	0
	Ppa1	3.1153e-73	0.493089	0.604	0.22	4.80784e-69	0
	Pcm1	3.36463e-73	0.443698	0.757	0.346	5.19263e-69	0
	Slc24a5	5.74994e-73	0.357414	0.47	0.126	8.87388e-69	0
	Cct7	6.19357e-73	0.459077	0.916	0.766	9.55854e-69	0
	Usmg5	8.32468e-73	0.439336	0.988	0.937	1.28475e-68	0
	Btf3	1.07326e-72	0.361879	0.998	0.996	1.65636e-68	0
	Cby1	1.14639e-72	0.303786	0.392	0.085	1.76923e-68	0
	Rnf168	1.48855e-72	0.334617	0.462	0.122	2.29728e-68	0
	Phf6	2.4794e-72	0.387137	0.564	0.189	3.82646e-68	0
	Mif	3.2814e-72	0.76315	0.946	0.85	5.06418e-68	0
	Trim27	3.38499e-72	0.436341	0.661	0.263	5.22406e-68	0
	Cmss1	3.83109e-72	0.304747	0.341	0.065	5.91252e-68	0
	2020-09-06	3.91429e-72	0.482508	0.779	0.385	6.04092e-68	0
	Chchd1	6.34837e-72	0.46917	0.906	0.747	9.79744e-68	0
	Sit1	7.77584e-72	0.319363	0.412	0.096	1.20005e-67	0
	Gtf2h5	7.79777e-72	0.421919	0.932	0.763	1.20343e-67	0
	Zcwpw1	8.81682e-72	0.30015	0.331	0.058	1.3607e-67	0
	Stag1	1.0161e-71	0.514168	0.811	0.484	1.56815e-67	0
	Idi1	1.04488e-71	0.340537	0.452	0.115	1.61257e-67	0
	Sarnp	1.59273e-71	0.443158	0.92	0.77	2.45807e-67	0
	Sms	1.85141e-71	0.479372	0.823	0.474	2.85728e-67	0
	Ndufv3	1.8882e-71	0.423751	0.94	0.798	2.91406e-67	0
	Sac3d1	4.15079e-71	0.288361	0.398	0.089	6.40592e-67	0
	Fundc2	4.3758e-71	0.491317	0.789	0.421	6.75318e-67	0
	Ppm1g	4.4096e-71	0.478688	0.869	0.61	6.80534e-67	0
	Ccnd3	5.92308e-71	0.619066	0.952	0.88	9.1411e-67	0
	Brd8	6.43131e-71	0.516549	0.737	0.363	9.92544e-67	0
	Lsm7	7.90704e-71	0.493757	0.779	0.429	1.22029e-66	0
	Ndufb6	8.06646e-71	0.444545	0.902	0.675	1.2449e-66	0
	Ndufc2	8.81268e-71	0.411765	0.986	0.908	1.36006e-66	0
	Mrps18c	9.20541e-71	0.433702	0.869	0.565	1.42067e-66	0
	Rps7	1.0361e-70	0.369948	1	1	1.59902e-66	0
	Pgls	1.25771e-70	0.431669	0.97	0.912	1.94102e-66	0
	Sephs1	1.82308e-70	0.301913	0.426	0.106	2.81356e-66	0
	Xpo1	1.97529e-70	0.429203	0.699	0.296	3.04846e-66	0
	Pafah1b3	1.99442e-70	0.377748	0.669	0.247	3.07798e-66	0
	Rps2	3.95045e-70	0.501285	1	1	6.09673e-66	0
	Pold1	4.29086e-70	0.36394	0.496	0.146	6.62208e-66	0
	Ewsr1	5.3676e-70	0.428785	0.92	0.76	8.28382e-66	0
	Rpl21	5.63595e-70	0.34681	1	1	8.69796e-66	0
	Arl6ip4	9.96928e-70	0.420208	0.769	0.371	1.53856e-65	0
	Rpl39	1.11085e-69	0.350752	1	1	1.71438e-65	0
	Mrpl12	1.14804e-69	0.528244	0.781	0.453	1.77176e-65	0
	Psmc1	2.31473e-69	0.453549	0.765	0.382	3.57233e-65	0
	G3bp1	2.32789e-69	0.469274	0.932	0.817	3.59263e-65	0
	Clns1a	2.56287e-69	0.42512	0.685	0.29	3.95527e-65	0
	Stag2	2.74035e-69	0.488295	0.896	0.69	4.22918e-65	0
	Dcps	2.76406e-69	0.399408	0.612	0.234	4.26578e-65	0
	Tcf12	3.21654e-69	0.490174	0.849	0.54	4.96408e-65	0
	Nsmce2	3.33146e-69	0.399035	0.653	0.263	5.14145e-65	0
	Ndufb5	8.93038e-69	0.382837	0.972	0.895	1.37823e-64	0
	Hp1bp3	9.41547e-69	0.536298	0.863	0.614	1.45309e-64	0
	Rnf157	1.04129e-68	0.460622	0.653	0.253	1.60702e-64	0
	Rpl6	1.27546e-68	0.341138	1	1	1.96842e-64	0
	0610010K14Rik	1.38419e-68	0.44337	0.643	0.271	2.13623e-64	0
	Rpl13	1.74773e-68	0.363412	1	1	2.69728e-64	0
	Gar1	1.77025e-68	0.427183	0.52	0.173	2.73203e-64	0
	Cenpc1	2.81824e-68	0.336989	0.492	0.144	4.34939e-64	0
	D030056L22Rik	2.98448e-68	0.305686	0.42	0.105	4.60595e-64	0
	Smpd4	3.02554e-68	0.254566	0.349	0.07	4.66932e-64	0
	Cdc25b	3.076e-68	0.352777	0.388	0.091	4.74718e-64	0
	Rps15	3.57639e-68	0.381951	1	0.996	5.51945e-64	0
	Nans	4.18628e-68	0.376757	0.655	0.263	6.46069e-64	0
	Smarcd1	4.34534e-68	0.387951	0.592	0.215	6.70616e-64	0
	Itpa	6.6861e-68	0.335171	0.49	0.146	1.03187e-63	0
	Tsc22d4	1.28776e-67	0.510036	0.976	0.928	1.9874e-63	0
	Ulbp1	1.29033e-67	0.276258	0.297	0.049	1.99136e-63	0
	Khdrbs1	1.8753e-67	0.451809	0.924	0.799	2.89415e-63	0
	Hnrnpc	1.97914e-67	0.39995	0.972	0.903	3.0544e-63	0
	Rbmx2	2.12959e-67	0.277711	0.406	0.098	3.28659e-63	0
	Cux1	2.58181e-67	0.491905	0.916	0.794	3.98451e-63	0
	Eif4a3	3.02744e-67	0.492357	0.837	0.547	4.67225e-63	0
	Ubl4a	3.19712e-67	0.352248	0.622	0.235	4.93412e-63	0
	Bzw1	3.77712e-67	0.398898	0.96	0.881	5.82923e-63	0
	Chchd6	4.29647e-67	0.258891	0.309	0.055	6.63074e-63	0
	Tma7	4.55012e-67	0.348087	1	0.984	7.02219e-63	0
	Pgp	5.04006e-67	0.440944	0.675	0.293	7.77833e-63	0
	Cdkn2aipnl	5.16787e-67	0.398853	0.564	0.2	7.97558e-63	0
	Paxip1	5.24203e-67	0.293292	0.398	0.095	8.09003e-63	0
	Anapc15	5.4718e-67	0.368117	0.578	0.207	8.44463e-63	0
	Pcnt	8.79306e-67	0.374523	0.59	0.214	1.35703e-62	0
	Ilkap	1.32109e-66	0.393362	0.755	0.365	2.03883e-62	0
	Ppwd1	1.45001e-66	0.430735	0.701	0.298	2.23781e-62	0
	Drg1	1.50287e-66	0.372144	0.651	0.264	2.31937e-62	0
	Uqcrh	1.64325e-66	0.332312	1	0.992	2.53602e-62	0
	Ndufb10	1.68208e-66	0.375322	0.982	0.898	2.59595e-62	0
	Rpl18a	1.75019e-66	0.329635	1	1	2.70107e-62	0
	1110004F10Rik	1.81667e-66	0.45056	0.886	0.69	2.80367e-62	0
	Psmb1	2.32462e-66	0.359793	0.99	0.947	3.58759e-62	0
	Hdac7	2.55503e-66	0.393203	0.697	0.279	3.94318e-62	0
	Nelfe	2.65163e-66	0.399367	0.572	0.21	4.09227e-62	0
	Slc29a1	2.71524e-66	0.395344	0.624	0.239	4.19043e-62	0
	Espl1	4.04472e-66	0.274347	0.357	0.076	6.24222e-62	0
	Tubb2b	4.79068e-66	0.500492	0.578	0.21	7.39346e-62	0
	Tube1	5.46361e-66	0.332166	0.4	0.099	8.43198e-62	0
	Rpap3	6.88527e-66	0.290846	0.4	0.099	1.0626e-61	0
	Aamdc	7.23402e-66	0.33594	0.498	0.156	1.11643e-61	0
	Msl3	8.51791e-66	0.366036	0.614	0.232	1.31457e-61	0
	Sf3b5	1.25768e-65	0.393115	0.956	0.827	1.94098e-61	0
	Txnl1	1.44204e-65	0.410814	0.894	0.694	2.2255e-61	0
	Htatsf1	2.17966e-65	0.376262	0.596	0.226	3.36387e-61	0
	Pfas	2.32876e-65	0.26463	0.335	0.069	3.59398e-61	0
	Pbrm1	2.37293e-65	0.5115	0.906	0.736	3.66214e-61	0
	Zcchc17	2.6362e-65	0.375875	0.667	0.277	4.06845e-61	0
	Gspt1	3.85477e-65	0.472495	0.849	0.606	5.94907e-61	0
	Frat2	4.18852e-65	0.350607	0.546	0.183	6.46414e-61	0
	Ppp1r35	5.47425e-65	0.391746	0.633	0.254	8.4484e-61	0
	Lzic	6.09883e-65	0.307623	0.478	0.141	9.41232e-61	0
	Zcchc8	6.76563e-65	0.369184	0.582	0.21	1.04414e-60	0
	Rmnd5a	6.80416e-65	0.595368	0.791	0.472	1.05009e-60	0
	Mbd4	7.02067e-65	0.250841	0.349	0.074	1.0835e-60	0
	Ppp1r7	8.76322e-65	0.36943	0.59	0.22	1.35243e-60	0
	Mrps28	9.63287e-65	0.418346	0.635	0.271	1.48664e-60	0
	Nup205	1.00366e-64	0.299332	0.422	0.111	1.54895e-60	0
	Ung	1.04742e-64	0.371381	0.285	0.049	1.61648e-60	0
	Srsf4	1.17635e-64	0.409473	0.614	0.243	1.81547e-60	0
	Mrpl42	1.47805e-64	0.453235	0.801	0.459	2.28107e-60	0
	Eif3m	1.81154e-64	0.390305	0.958	0.852	2.79576e-60	0
	Psmc4	2.15427e-64	0.4085	0.896	0.652	3.32468e-60	0
	Pitpnm2	2.29247e-64	0.270568	0.357	0.079	3.53797e-60	0
	Fzr1	3.22433e-64	0.38958	0.494	0.162	4.97611e-60	0
	Cox6b1	3.91272e-64	0.3334	0.998	0.987	6.0385e-60	0
	Sssca1	4.33045e-64	0.374815	0.6	0.232	6.68318e-60	0
	Nkap	6.67557e-64	0.345239	0.58	0.21	1.03024e-59	0
	Ndufb7	6.79669e-64	0.350732	0.982	0.94	1.04893e-59	0
	4921524J17Rik	7.72371e-64	0.334427	0.518	0.172	1.192e-59	0
	Taf15	9.61627e-64	0.447812	0.743	0.374	1.48408e-59	0
	Dcaf1	1.25494e-63	0.299318	0.416	0.109	1.93675e-59	0
	Cd27	1.2966e-63	0.452361	0.767	0.364	2.00104e-59	0
	Taf1d	1.31067e-63	0.463179	0.934	0.794	2.02276e-59	0
	Srp19	1.56128e-63	0.421143	0.892	0.696	2.40952e-59	0
	Tomm20	1.81405e-63	0.402617	0.984	0.938	2.79963e-59	0
	Eefsec	2.15207e-63	0.326998	0.48	0.148	3.32129e-59	0
	Ruvbl2	3.18089e-63	0.326543	0.48	0.149	4.90907e-59	0
	Ndufaf2	3.34399e-63	0.348462	0.494	0.159	5.16077e-59	0
	Wee1	4.68563e-63	0.262059	0.388	0.093	7.23133e-59	0
	Rpgrip1	6.01557e-63	0.431476	0.675	0.306	9.28383e-59	0
	Cetn3	6.23096e-63	0.413165	0.892	0.614	9.61624e-59	0
	Coq7	7.89165e-63	0.31138	0.428	0.119	1.21792e-58	0
	Seh1l	1.11138e-62	0.331909	0.554	0.195	1.71519e-58	0
	Sfpq	1.48104e-62	0.446082	0.978	0.92	2.28569e-58	0
	Exosc7	1.54459e-62	0.397294	0.602	0.241	2.38376e-58	0
	Mrps16	1.54862e-62	0.385123	0.886	0.663	2.38998e-58	0
	Hibadh	1.90059e-62	0.42412	0.669	0.304	2.93318e-58	0
	Mrpl28	1.97419e-62	0.41663	0.745	0.382	3.04677e-58	0
	Sf3b2	2.04937e-62	0.388126	0.962	0.895	3.1628e-58	0
	Mrpl23	2.27011e-62	0.422022	0.896	0.711	3.50346e-58	0
	Pcbp2	3.04164e-62	0.32824	1	0.956	4.69416e-58	0
	Rnf7	5.14166e-62	0.396015	0.892	0.7	7.93512e-58	0
	Eloc	9.35246e-62	0.384548	0.96	0.841	1.44337e-57	0
	Rpl27	1.24908e-61	0.305887	1	0.999	1.92771e-57	0
	Dnah8	1.25698e-61	0.275258	0.339	0.074	1.93989e-57	0
	Psmd12	1.49891e-61	0.431459	0.825	0.522	2.31327e-57	0
	Dkc1	1.90807e-61	0.449344	0.554	0.211	2.94473e-57	0
	Gtf2h4	2.29795e-61	0.434427	0.592	0.236	3.54643e-57	0
	Gtf3a	2.46936e-61	0.372739	0.627	0.261	3.81096e-57	0
	Mrpl46	2.54896e-61	0.338137	0.528	0.187	3.93381e-57	0
	Pds5a	4.3355e-61	0.460941	0.829	0.519	6.69098e-57	0
	Fam169b	6.74757e-61	0.348798	0.464	0.145	1.04135e-56	0
	Atp5c1	7.04034e-61	0.354904	0.99	0.952	1.08654e-56	0
	Rbm15	7.91349e-61	0.332709	0.524	0.181	1.22129e-56	0
	Snrpa	9.63412e-61	0.428135	0.733	0.396	1.48683e-56	0
	Polr2c	1.12724e-60	0.411474	0.801	0.468	1.73967e-56	0
	Nfatc2ip	1.16244e-60	0.266214	0.373	0.092	1.794e-56	0
	Ano6	1.19254e-60	0.459175	0.687	0.328	1.84045e-56	0
	Tmem97	1.78426e-60	0.262438	0.357	0.083	2.75365e-56	0
	Atxn10	3.62444e-60	0.378788	0.725	0.348	5.5936e-56	0
	Carmil2	3.9907e-60	0.265511	0.355	0.084	6.15884e-56	0
	Memo1	4.03045e-60	0.29936	0.42	0.118	6.2202e-56	0
	Dck	4.70929e-60	0.421237	0.789	0.431	7.26785e-56	0
	Rp9	4.92886e-60	0.388878	0.93	0.767	7.60671e-56	0
	Hes6	6.45723e-60	0.346443	0.588	0.228	9.96545e-56	0
	Mad1l1	8.55581e-60	0.268266	0.363	0.089	1.32042e-55	0
	Tap2	9.0649e-60	0.464241	0.892	0.704	1.39899e-55	0
	Atp5d	9.26099e-60	0.349172	0.994	0.956	1.42925e-55	0
	Timm8a1	1.41417e-59	0.42154	0.506	0.182	2.18249e-55	0
	Cdc26	1.48697e-59	0.390111	0.777	0.417	2.29484e-55	0
	Rps5	1.49867e-59	0.339362	1	0.999	2.3129e-55	0
	Patz1	1.56005e-59	0.329093	0.548	0.194	2.40763e-55	0
	Prelid3b	3.12811e-59	0.38418	0.643	0.28	4.82761e-55	0
	Eif1ad	3.65522e-59	0.360338	0.606	0.243	5.64111e-55	0
	Jade1	3.92459e-59	0.306909	0.442	0.132	6.05682e-55	0
	Hcfc1	5.42999e-59	0.374997	0.606	0.254	8.38011e-55	0
	Ttll12	5.58802e-59	0.267883	0.361	0.089	8.62399e-55	0
	Rbx1	6.41317e-59	0.324769	1	0.977	9.89745e-55	0
	Ndufb3	1.1466e-58	0.382925	0.95	0.851	1.76956e-54	0
	Tsfm	1.4191e-58	0.336058	0.524	0.189	2.1901e-54	0
	Ints11	1.5803e-58	0.327959	0.528	0.189	2.43887e-54	0
	Ankrd10	1.60886e-58	0.347075	0.572	0.222	2.48295e-54	0
	Txlna	1.75308e-58	0.370379	0.612	0.255	2.70553e-54	0
	Dnaja1	1.81061e-58	0.375305	0.99	0.959	2.79431e-54	0
	Psmc3	3.14253e-58	0.390525	0.888	0.7	4.84987e-54	0
	Rpl18	3.60484e-58	0.297091	1	1	5.56336e-54	0
	Nolc1	3.69946e-58	0.49634	0.612	0.263	5.70937e-54	0
	Ing1	4.5771e-58	0.3701	0.671	0.294	7.06383e-54	0
	Epb41	4.58689e-58	0.40205	0.691	0.315	7.07895e-54	0
	Rnf126	7.31087e-58	0.333081	0.586	0.234	1.12829e-53	0
	Shmt2	8.95996e-58	0.320875	0.359	0.093	1.38279e-53	0
	Ccdc25	9.29716e-58	0.34387	0.506	0.177	1.43483e-53	0
	Gemin2	9.96866e-58	0.261937	0.353	0.086	1.53846e-53	0
	Psmb6	1.38792e-57	0.341609	0.962	0.888	2.14197e-53	0
	Prpf4	2.30133e-57	0.312706	0.464	0.15	3.55164e-53	0
	Myg1	2.47625e-57	0.323769	0.494	0.17	3.82159e-53	0
	Gnas	2.83769e-57	0.291636	1	0.99	4.37941e-53	0
	Rps27a	3.02855e-57	0.294613	1	1	4.67396e-53	0
	Ndufb2	4.0879e-57	0.370717	0.922	0.786	6.30886e-53	0
	Pigyl	4.60407e-57	0.32555	0.596	0.24	7.10547e-53	0
	Mrps11	4.92928e-57	0.323497	0.516	0.187	7.60736e-53	0
	Vars	5.02188e-57	0.425693	0.683	0.335	7.75027e-53	0
	Khsrp	6.53721e-57	0.349744	0.665	0.29	1.00889e-52	0
	Mrps5	6.64049e-57	0.341035	0.584	0.236	1.02483e-52	0
	Tapt1	6.70515e-57	0.322174	0.516	0.181	1.03481e-52	0
	Rps23	9.99111e-57	0.306698	1	1	1.54193e-52	0
	Leo1	1.12935e-56	0.308281	0.47	0.154	1.74292e-52	0
	Sh2d2a	1.17246e-56	0.3378	0.492	0.164	1.80946e-52	0
	Nop56	1.33513e-56	0.449589	0.793	0.478	2.0605e-52	0
	Zfp219	1.37848e-56	0.30621	0.424	0.127	2.12741e-52	0
	Zdhhc8	1.57313e-56	0.287984	0.432	0.13	2.42781e-52	0
	Arl6ip6	1.60699e-56	0.3532	0.524	0.193	2.48007e-52	0
	Zmynd19	1.71223e-56	0.259136	0.323	0.073	2.64249e-52	0
	Rnaseh2c	1.73881e-56	0.402489	0.845	0.608	2.68351e-52	0
	Ly6d	1.74431e-56	0.761022	0.878	0.751	2.692e-52	0
	Rps24	1.87269e-56	0.312176	1	1	2.89012e-52	0
	Mbd3	2.38992e-56	0.412134	0.799	0.483	3.68836e-52	0
	Cep83	2.77816e-56	0.346267	0.618	0.253	4.28753e-52	0
	Rack1	2.84336e-56	0.311684	1	0.997	4.38816e-52	0
	Rps27l	3.15867e-56	0.337556	0.996	0.961	4.87477e-52	0
	Tsn	4.72659e-56	0.362999	0.918	0.787	7.29455e-52	0
	Cnot2	5.00533e-56	0.370213	0.659	0.297	7.72472e-52	0
	Sytl3	5.16927e-56	0.257973	0.341	0.082	7.97773e-52	0
	Tiprl	5.89624e-56	0.354575	0.61	0.26	9.09967e-52	0
	N4bp2	7.43467e-56	0.3813	0.604	0.252	1.14739e-51	0
	Polr2i	8.56617e-56	0.391129	0.775	0.438	1.32202e-51	0
	Tfrc	1.00324e-55	0.269158	0.392	0.106	1.54831e-51	0
	Ppp1ca	1.26241e-55	0.320313	0.992	0.97	1.94828e-51	0
	Polr2m	1.41556e-55	0.374157	0.761	0.422	2.18464e-51	0
	Cenpx	1.43368e-55	0.403553	0.847	0.607	2.21259e-51	0
	Pebp1	2.13632e-55	0.49743	0.9	0.823	3.29699e-51	0
	Rbm8a	2.32043e-55	0.37808	0.916	0.81	3.58113e-51	0
	Rbbp8	2.3818e-55	0.339353	0.53	0.198	3.67584e-51	0
	Rps18	3.00824e-55	0.35813	1	0.998	4.64261e-51	0
	Top2b	4.67785e-55	0.445208	0.873	0.689	7.21932e-51	0
	Srpk1	4.69761e-55	0.448069	0.691	0.355	7.24982e-51	0
	Stk26	4.80239e-55	0.261645	0.414	0.121	7.41153e-51	0
	Phf2	4.88946e-55	0.36148	0.582	0.235	7.54591e-51	0
	Sf3a1	4.96641e-55	0.333221	0.576	0.23	7.66467e-51	0
	Ndufb8	6.31693e-55	0.33781	0.982	0.923	9.74892e-51	0
	Cct5	6.89719e-55	0.376912	0.95	0.862	1.06444e-50	0
	Cyb5b	6.99086e-55	0.32869	0.622	0.263	1.0789e-50	0
	Aimp1	7.86081e-55	0.372032	0.912	0.783	1.21316e-50	0
	Rpl36	8.27029e-55	0.333421	1	0.998	1.27635e-50	0
	Mta1	9.26682e-55	0.304396	0.474	0.162	1.43015e-50	0
	E2f1	9.45898e-55	0.28929	0.371	0.1	1.4598e-50	0
	Tubgcp2	1.00414e-54	0.260593	0.394	0.112	1.54969e-50	0
	Mrpl9	1.30199e-54	0.344943	0.612	0.264	2.00937e-50	0
	Iws1	1.39043e-54	0.375516	0.643	0.285	2.14584e-50	0
	Rnf187	1.97774e-54	0.363607	0.92	0.717	3.05225e-50	0
	Abcf2	2.10497e-54	0.342008	0.52	0.199	3.2486e-50	0
	Dhx9	2.19546e-54	0.423694	0.839	0.594	3.38825e-50	0
	2810004N23Rik	2.41079e-54	0.373387	0.592	0.247	3.72057e-50	0
	Pfdn6	3.20218e-54	0.382923	0.859	0.614	4.94193e-50	0
	Fam162a	3.98377e-54	0.392574	0.645	0.304	6.14815e-50	0
	Tmem108	4.82379e-54	0.290982	0.402	0.117	7.44456e-50	0
	Lta4h	5.14118e-54	0.321243	0.635	0.269	7.93438e-50	0
	Eif3i	6.04582e-54	0.381732	0.936	0.826	9.33051e-50	0
	Uqcrfs1	8.62699e-54	0.339656	0.95	0.865	1.3314e-49	0
	Edf1	9.09421e-54	0.306612	0.988	0.964	1.40351e-49	0
	Rrp1	9.32301e-54	0.376335	0.916	0.761	1.43882e-49	0
	Psmb5	9.62056e-54	0.37628	0.952	0.893	1.48474e-49	0
	Eif2s2	1.32455e-53	0.383947	0.986	0.928	2.04418e-49	0
	1300002E11Rik	1.63263e-53	0.317758	0.522	0.193	2.51963e-49	0
	Chtop	1.79397e-53	0.344011	0.715	0.35	2.76863e-49	0
	Mthfd2	2.21013e-53	0.31064	0.49	0.17	3.41089e-49	0
	Psmg2	2.36935e-53	0.297257	0.49	0.175	3.65661e-49	0
	Kif2a	2.45505e-53	0.395063	0.647	0.305	3.78887e-49	0
	Vegfb	2.47234e-53	0.250451	0.371	0.1	3.81556e-49	0
	Casp2	2.53515e-53	0.271867	0.438	0.14	3.91249e-49	0
	Gart	2.56666e-53	0.360219	0.476	0.172	3.96113e-49	0
	Ndufa8	2.87684e-53	0.355312	0.922	0.787	4.43983e-49	0
	Nfatc3	3.11319e-53	0.45797	0.773	0.475	4.80459e-49	0
	Cinp	3.31471e-53	0.268556	0.422	0.13	5.1156e-49	0
	Fmc1	3.86604e-53	0.387069	0.608	0.271	5.96646e-49	0
	Pop5	5.16294e-53	0.368126	0.699	0.35	7.96797e-49	0
	Smarca4	5.32097e-53	0.419483	0.843	0.569	8.21186e-49	0
	Scaf11	6.5377e-53	0.385446	0.91	0.776	1.00896e-48	0
	Dnajc2	7.43681e-53	0.419977	0.793	0.484	1.14772e-48	0
	Gm10076	7.46318e-53	0.539288	0.9	0.808	1.15179e-48	0
	Med9	7.71311e-53	0.275144	0.458	0.154	1.19036e-48	0
	2610002M06Rik	1.05223e-52	0.283671	0.444	0.147	1.62391e-48	0
	Sec61b	1.19402e-52	0.320285	1	0.985	1.84274e-48	0
	Zap70	1.39293e-52	0.263677	0.373	0.104	2.14971e-48	0
	Ncbp1	1.60544e-52	0.332311	0.51	0.195	2.47768e-48	0
	Ube2e1	1.75376e-52	0.365541	0.753	0.431	2.70657e-48	0
	Dbi	2.12493e-52	0.308255	0.986	0.92	3.27941e-48	0
	Cdc16	2.33404e-52	0.255546	0.43	0.136	3.60213e-48	0
	Nudt19	2.7461e-52	0.264156	0.446	0.145	4.23805e-48	0
	Mier1	2.78449e-52	0.412684	0.966	0.848	4.29731e-48	0
	Ndufs4	2.83026e-52	0.36036	0.89	0.755	4.36794e-48	0
	Tfdp2	3.58688e-52	0.272987	0.416	0.128	5.53564e-48	0
	Tcerg1	6.12671e-52	0.370497	0.598	0.263	9.45535e-48	0
	Commd1	9.44557e-52	0.381457	0.821	0.555	1.45773e-47	0
	U2surp	1.1744e-51	0.382814	0.873	0.689	1.81246e-47	0
	Txnl4a	1.19702e-51	0.370978	0.663	0.327	1.84736e-47	0
	Rbm14	1.23406e-51	0.269566	0.44	0.143	1.90453e-47	0
	Taf5	1.38044e-51	0.260503	0.355	0.097	2.13043e-47	0
	Cox7b	1.3853e-51	0.357961	0.988	0.951	2.13794e-47	0
	Rpl9	1.53034e-51	0.270123	1	1	2.36178e-47	0
	Psmd14	1.62458e-51	0.357176	0.799	0.497	2.50721e-47	0
	Ndufv2	1.79163e-51	0.346872	0.904	0.748	2.76502e-47	0
	Carnmt1	1.87221e-51	0.295794	0.504	0.186	2.88938e-47	0
	Cct8	2.39381e-51	0.429581	0.924	0.831	3.69437e-47	0
	Acbd6	2.47825e-51	0.33391	0.665	0.315	3.82469e-47	0
	Msh3	2.79752e-51	0.276285	0.41	0.127	4.31741e-47	0
	Slamf6	3.66131e-51	0.340487	0.56	0.224	5.6505e-47	0
	Uqcrq	4.04708e-51	0.360718	0.992	0.959	6.24587e-47	0
	Itk	4.07961e-51	0.313131	0.528	0.197	6.29607e-47	0
	Slf1	7.11873e-51	0.255835	0.361	0.101	1.09863e-46	0
	Psmb2	7.58928e-51	0.330109	0.938	0.857	1.17125e-46	0
	Ubald2	8.69605e-51	0.457447	0.855	0.71	1.34206e-46	0
	Ndufa2	9.26658e-51	0.306588	0.998	0.965	1.43011e-46	0
	Pole4	1.08163e-50	0.395897	0.781	0.482	1.66929e-46	0
	Inip	1.21953e-50	0.284393	0.456	0.157	1.88211e-46	0
	Def6	1.34613e-50	0.350055	0.659	0.306	2.07748e-46	0
	Churc1	1.38472e-50	0.374084	0.821	0.561	2.13704e-46	0
	Tdg	1.51829e-50	0.298212	0.496	0.184	2.34317e-46	0
	Nifk	1.9745e-50	0.338909	0.514	0.203	3.04725e-46	0
	Gtf2e2	2.38643e-50	0.295313	0.546	0.219	3.68299e-46	0
	Trp53	2.55609e-50	0.388169	0.657	0.33	3.94481e-46	0
	Eif3e	2.62286e-50	0.341694	0.97	0.918	4.04787e-46	0
	Ywhaq	2.69723e-50	0.330743	0.948	0.83	4.16263e-46	0
	Smim11	2.77315e-50	0.366565	0.767	0.45	4.27981e-46	0
	Zc3h14	3.6006e-50	0.325189	0.598	0.262	5.5568e-46	0
	Orc2	4.17052e-50	0.261772	0.404	0.126	6.43636e-46	0
	Rtf1	4.55006e-50	0.360055	0.894	0.713	7.02211e-46	0
	Tpr	4.86417e-50	0.321751	0.984	0.953	7.50687e-46	0
	Zc3h15	5.51258e-50	0.368218	0.888	0.647	8.50757e-46	0
	Rbm10	5.95184e-50	0.293659	0.486	0.179	9.18548e-46	0
	Dnajc15	5.99555e-50	0.417768	0.886	0.761	9.25293e-46	0
	Atrx	6.16891e-50	0.359215	0.962	0.863	9.52049e-46	0
	Hadh	9.82165e-50	0.290771	0.47	0.168	1.51578e-45	0
	Thoc3	1.3096e-49	0.291234	0.524	0.205	2.02111e-45	0
	Prpf38a	1.33962e-49	0.314809	0.566	0.238	2.06743e-45	0
	Bpgm	1.45756e-49	0.251872	0.351	0.098	2.24945e-45	0
	Ntrk3	1.49339e-49	0.294392	0.406	0.126	2.30474e-45	0
	Ss18l2	1.68771e-49	0.257325	0.488	0.176	2.60464e-45	0
	Xrcc1	1.81008e-49	0.257115	0.39	0.119	2.7935e-45	0
	Hspd1	1.84507e-49	0.667191	0.863	0.762	2.84749e-45	0
	Taf1	2.03423e-49	0.325233	0.58	0.245	3.13942e-45	0
	Parp1	2.07848e-49	0.392842	0.737	0.416	3.20773e-45	0
	Cox6a1	2.13744e-49	0.326442	0.986	0.951	3.29871e-45	0
	Gm26917	2.85376e-49	0.368486	0.894	0.758	4.4042e-45	0
	Taf12	2.96533e-49	0.323018	0.608	0.269	4.5764e-45	0
	Zfp266	3.08661e-49	0.301932	0.584	0.245	4.76357e-45	0
	Ing2	3.24151e-49	0.340569	0.576	0.249	5.00262e-45	0
	Cdkn2d	3.62273e-49	0.504616	0.681	0.375	5.59096e-45	0
	Ptges3	3.83447e-49	0.432493	0.892	0.786	5.91773e-45	0
	Ipo5	4.42015e-49	0.362071	0.51	0.207	6.82162e-45	0
	Acin1	4.54224e-49	0.344501	0.942	0.863	7.01003e-45	0
	E2f4	4.78006e-49	0.322163	0.606	0.269	7.37706e-45	0
	Ube2m	5.2263e-49	0.354316	0.884	0.704	8.06575e-45	0
	Ddt	7.31376e-49	0.295524	0.653	0.306	1.12873e-44	0
	Mrpl57	7.34445e-49	0.355739	0.89	0.706	1.13347e-44	0
	Smc5	7.50729e-49	0.312734	0.504	0.192	1.1586e-44	0
	Kpna3	9.01705e-49	0.316103	0.528	0.214	1.3916e-44	0
	Ppp5c	1.04103e-48	0.27274	0.474	0.17	1.60663e-44	0
	Cfap36	1.07209e-48	0.289346	0.47	0.172	1.65456e-44	0
	Wbp11	1.08278e-48	0.378554	0.869	0.699	1.67105e-44	0
	Timm17b	1.10509e-48	0.335192	0.649	0.313	1.70548e-44	0
	Hdgfl2	1.10768e-48	0.273938	0.478	0.174	1.70948e-44	0
	Odf2	1.20978e-48	0.328711	0.538	0.222	1.86705e-44	0
	Meaf6	1.2649e-48	0.343629	0.57	0.25	1.95211e-44	0
	Mrpl22	1.37341e-48	0.295313	0.546	0.225	2.11958e-44	0
	Prpf40a	1.422e-48	0.342237	0.914	0.796	2.19457e-44	0
	Smarcb1	1.67252e-48	0.321148	0.627	0.286	2.58119e-44	0
	Hmbs	2.12092e-48	0.253117	0.448	0.154	3.27321e-44	0
	Mrps34	2.46799e-48	0.337903	0.631	0.297	3.80885e-44	0
	Mrpl27	2.66338e-48	0.308782	0.56	0.237	4.11039e-44	0
	Rps12	2.72161e-48	0.326158	1	1	4.20026e-44	0
	Utp11	3.32044e-48	0.354298	0.657	0.324	5.12444e-44	0
	Rpl17	3.73086e-48	0.308799	1	0.998	5.75784e-44	0
	Eif2s1	4.27016e-48	0.398769	0.829	0.606	6.59014e-44	0
	Psmd9	5.4099e-48	0.290012	0.596	0.264	8.3491e-44	0
	Gtf2i	6.25855e-48	0.327115	0.558	0.237	9.65881e-44	0
	Cycs	7.97908e-48	0.421722	0.952	0.89	1.23141e-43	0
	Ptov1	8.79905e-48	0.35818	0.554	0.243	1.35796e-43	0
	Acap1	8.82604e-48	0.3269	0.57	0.242	1.36212e-43	0
	Utp3	9.63413e-48	0.379913	0.823	0.568	1.48684e-43	0
	Cep97	1.03986e-47	0.268471	0.436	0.146	1.60482e-43	0
	Prmt5	1.68747e-47	0.284016	0.384	0.122	2.60428e-43	0
	Mplkip	1.70092e-47	0.325242	0.647	0.309	2.62502e-43	0
	Lsm1	2.19504e-47	0.292497	0.598	0.264	3.3876e-43	0
	Kars	2.981e-47	0.306583	0.516	0.212	4.60057e-43	0
	Rps6kb1	3.61226e-47	0.32442	0.653	0.311	5.57479e-43	0
	Blmh	3.66979e-47	0.314707	0.582	0.255	5.66359e-43	0
	Rps29	3.75065e-47	0.252489	1	1	5.78837e-43	0
	Gsk3a	3.93554e-47	0.284279	0.592	0.253	6.07371e-43	0
	Psmb8	4.24657e-47	0.250655	1	0.971	6.55374e-43	0
	H3f3a	6.63315e-47	0.278033	1	1	1.02369e-42	0
	Nup50	9.8287e-47	0.293249	0.504	0.2	1.51686e-42	0
	Thap12	1.16689e-46	0.280952	0.44	0.156	1.80086e-42	0
	Eif4h	1.49603e-46	0.336232	0.924	0.83	2.30882e-42	0
	Ddx46	1.50992e-46	0.36105	0.867	0.699	2.33025e-42	0
	Mrpl21	1.72698e-46	0.368756	0.743	0.449	2.66525e-42	0
	Ddx27	1.82748e-46	0.336376	0.588	0.274	2.82036e-42	0
	Rpl26	2.37072e-46	0.286033	1	0.998	3.65874e-42	0
	Polr2k	2.61786e-46	0.335121	0.904	0.738	4.04014e-42	0
	Zfp280d	3.15498e-46	0.322488	0.604	0.272	4.86909e-42	0
	Rtraf	3.24612e-46	0.299188	0.968	0.883	5.00974e-42	0
	Mdh2	3.5196e-46	0.322184	0.94	0.859	5.43179e-42	0
	Romo1	4.08824e-46	0.355124	0.93	0.836	6.30937e-42	0
	Mrpl14	4.17658e-46	0.362888	0.813	0.58	6.44572e-42	0
	Ccnh	5.6347e-46	0.286598	0.476	0.182	8.69603e-42	0
	Dnajb1	7.06202e-46	0.323411	0.659	0.316	1.08988e-41	0
	Smim8	8.92093e-46	0.261908	0.434	0.153	1.37677e-41	0
	Pdzd11	9.48335e-46	0.276369	0.472	0.179	1.46357e-41	0
	Jpt1	9.59038e-46	0.496762	0.964	0.943	1.48008e-41	0
	Xist	1.21603e-45	0.279772	1	0.99	1.87671e-41	0
	Anapc1	1.29821e-45	0.293942	0.544	0.229	2.00352e-41	0
	Pdlim1	1.39275e-45	0.348199	0.727	0.384	2.14944e-41	0
	Cd6	1.45391e-45	0.301233	0.333	0.096	2.24381e-41	0
	Rpl27a	1.56508e-45	0.262209	1	1	2.41538e-41	0
	Atic	1.71995e-45	0.3747	0.538	0.237	2.6544e-41	0
	Rnaseh2a	1.80618e-45	0.299955	0.438	0.161	2.78748e-41	0
	Rsl1d1	2.06978e-45	0.442699	0.759	0.505	3.19428e-41	0
	Glcci1	2.15219e-45	0.297527	0.456	0.169	3.32148e-41	0
	Rasgrp2	2.21119e-45	0.391768	0.805	0.527	3.41253e-41	0
	Cep295	2.481e-45	0.285983	0.45	0.165	3.82893e-41	0
	Zfp410	3.31542e-45	0.278492	0.424	0.15	5.11668e-41	0
	Tssc4	4.348e-45	0.282223	0.466	0.176	6.71027e-41	0
	Ndufb9	4.47343e-45	0.299126	0.988	0.948	6.90384e-41	0
	Hist3h2ba	4.4836e-45	0.402732	0.544	0.23	6.91954e-41	0
	Mak16	4.79747e-45	0.320074	0.604	0.282	7.40394e-41	0
	Ak6	5.31833e-45	0.312379	0.542	0.234	8.20778e-41	0
	C1d	5.95807e-45	0.328521	0.777	0.486	9.19509e-41	0
	Mta2	6.43263e-45	0.307057	0.582	0.263	9.92748e-41	0
	Zc3h18	7.88076e-45	0.322635	0.606	0.286	1.21624e-40	0
	Mrpl30	9.20342e-45	0.31743	0.912	0.778	1.42036e-40	0
	Timm50	9.52824e-45	0.285967	0.512	0.208	1.47049e-40	0
	Sf3a2	1.12189e-44	0.284732	0.526	0.22	1.73141e-40	0
	Acp1	1.12942e-44	0.310729	0.659	0.329	1.74303e-40	0
	Pfdn1	1.22094e-44	0.334745	0.709	0.397	1.88427e-40	0
	R3hdm1	1.85293e-44	0.344322	0.799	0.511	2.85962e-40	0
	Strap	2.04733e-44	0.343846	0.803	0.515	3.15964e-40	0
	Sf3b4	2.09532e-44	0.305548	0.548	0.245	3.2337e-40	0
	Thyn1	2.12695e-44	0.267231	0.442	0.162	3.28253e-40	0
	Phax	2.27329e-44	0.318377	0.643	0.313	3.50837e-40	0
	Brix1	2.51381e-44	0.285145	0.542	0.231	3.87956e-40	0
	Luc7l3	4.17845e-44	0.370674	0.865	0.691	6.44861e-40	0
	Ubl5	4.95368e-44	0.266291	1	0.99	7.64502e-40	0
	Ddb1	5.03862e-44	0.325486	0.667	0.339	7.77611e-40	0
	Ddx42	5.12983e-44	0.319884	0.649	0.323	7.91687e-40	0
	Ubtf	6.831e-44	0.399266	0.811	0.569	1.05423e-39	0
	Kti12	7.41445e-44	0.258592	0.398	0.137	1.14427e-39	0
	Eef1a1	8.44082e-44	0.261901	1	1	1.30267e-39	0
	Rev3l	9.8509e-44	0.263126	0.46	0.171	1.52029e-39	0
	Cfap20	1.20131e-43	0.272495	0.48	0.19	1.85398e-39	0
	Dnajc8	1.27134e-43	0.332761	0.922	0.848	1.96206e-39	0
	Mettl9	1.41083e-43	0.280863	0.647	0.305	2.17733e-39	0
	Slc25a4	1.6329e-43	0.334531	0.884	0.68	2.52006e-39	0
	Caprin1	1.81674e-43	0.346961	0.869	0.752	2.80377e-39	0
	Faf1	3.18483e-43	0.282387	0.474	0.19	4.91515e-39	0
	Utp14b	3.59363e-43	0.336114	0.476	0.188	5.54605e-39	0
	Msi2	5.31424e-43	0.305909	0.6	0.276	8.20146e-39	0
	Srp9	6.5611e-43	0.295881	0.978	0.935	1.01257e-38	0
	Mrpl20	8.39065e-43	0.322273	0.902	0.766	1.29493e-38	0
	Rbm17	9.46797e-43	0.342372	0.779	0.501	1.46119e-38	0
	Immp1l	1.23308e-42	0.287929	0.546	0.245	1.90301e-38	0
	Atp5e	1.60744e-42	0.264971	1	0.995	2.48077e-38	0
	Glrx5	1.67811e-42	0.351038	0.715	0.419	2.58983e-38	0
	Smarce1	1.74779e-42	0.333691	0.829	0.596	2.69737e-38	0
	Mrps17	2.16322e-42	0.30926	0.695	0.372	3.3385e-38	0
	Rpl36al	2.52995e-42	0.287744	0.998	0.991	3.90447e-38	0
	Casp3	2.61206e-42	0.315422	0.504	0.21	4.0312e-38	0
	Psmc6	2.82497e-42	0.335051	0.843	0.646	4.35977e-38	0
	Magohb	3.55314e-42	0.30459	0.546	0.245	5.48356e-38	0
	Hmgxb4	4.04449e-42	0.265455	0.414	0.15	6.24186e-38	0
	Dnajc21	4.0996e-42	0.291817	0.616	0.294	6.32691e-38	0
	Dars	4.41293e-42	0.290531	0.566	0.258	6.81047e-38	0
	Oard1	4.6569e-42	0.264574	0.492	0.2	7.18699e-38	0
	Higd1a	6.35378e-42	0.371887	0.841	0.679	9.80579e-38	0
	Apex1	6.37307e-42	0.363041	0.51	0.226	9.83555e-38	0
	Cct3	6.98983e-42	0.413059	0.833	0.71	1.07874e-37	0
	Tardbp	8.4037e-42	0.363763	0.835	0.659	1.29694e-37	0
	Fip1l1	8.94262e-42	0.31925	0.735	0.432	1.38011e-37	0
	Gtf2f1	1.0342e-41	0.27695	0.578	0.266	1.59608e-37	0
	Dmac1	1.14544e-41	0.324292	0.687	0.382	1.76775e-37	0
	Rsl24d1	1.15533e-41	0.315292	0.612	0.303	1.78303e-37	0
	Mum1	1.28178e-41	0.274421	0.434	0.165	1.97817e-37	0
	Snhg6	1.28545e-41	0.301277	0.548	0.247	1.98383e-37	0
	Psmb7	1.56238e-41	0.333993	0.825	0.613	2.41123e-37	0
	Topors	1.66922e-41	0.307007	0.518	0.228	2.5761e-37	0
	Rps25	1.72953e-41	0.304845	1	0.997	2.66918e-37	0
	Grpel1	2.47441e-41	0.327435	0.827	0.607	3.81876e-37	0
	Sap18	2.99688e-41	0.315603	0.894	0.81	4.62508e-37	0
	Top1	3.62818e-41	0.313362	0.968	0.933	5.59937e-37	0
	Denr	3.73404e-41	0.335425	0.805	0.538	5.76274e-37	0
	Lnpk	4.47511e-41	0.280823	0.468	0.189	6.90644e-37	0
	C1galt1	4.92207e-41	0.297466	0.622	0.296	7.59622e-37	0
	Esf1	5.31226e-41	0.280664	0.631	0.307	8.19841e-37	0
	A930003A15Rik	7.8686e-41	0.286859	0.317	0.095	1.21436e-36	0
	Gstp1	8.44588e-41	0.423568	0.657	0.368	1.30345e-36	0
	Imp3	8.50872e-41	0.338358	0.791	0.543	1.31315e-36	0
	Srrm1	8.83594e-41	0.315291	0.952	0.876	1.36365e-36	0
	Luc7l	1.11196e-40	0.317623	0.558	0.264	1.71609e-36	0
	Hnrnph3	1.18524e-40	0.289964	0.592	0.284	1.82918e-36	0
	Tlk1	1.18557e-40	0.337459	0.669	0.361	1.82969e-36	0
	Mrpl11	1.7872e-40	0.282426	0.608	0.291	2.75818e-36	0
	Sash3	1.99633e-40	0.30461	0.655	0.341	3.08093e-36	0
	Mettl6	2.07457e-40	0.250986	0.408	0.149	3.20168e-36	0
	Synj2bp	2.10994e-40	0.284927	0.606	0.292	3.25627e-36	0
	Smarcd2	2.47658e-40	0.282022	0.733	0.427	3.82211e-36	0
	Ppp3cb	2.58588e-40	0.316349	0.582	0.282	3.99079e-36	0
	Dhx15	2.64807e-40	0.313851	0.847	0.643	4.08677e-36	0
	Matr3	2.77182e-40	0.30204	0.9	0.769	4.27775e-36	0
	Taf11	2.90733e-40	0.263872	0.55	0.248	4.48688e-36	0
	Chd4	3.22985e-40	0.322841	0.972	0.908	4.98463e-36	0
	Prrt1	3.48195e-40	0.258916	0.416	0.153	5.37369e-36	0
	Wdr12	3.55484e-40	0.297042	0.538	0.242	5.48619e-36	0
	Vps36	4.01455e-40	0.327297	0.807	0.552	6.19565e-36	0
	Syncrip	4.27927e-40	0.349172	0.817	0.621	6.6042e-36	0
	Sumo3	4.51032e-40	0.312186	0.703	0.396	6.96078e-36	0
	Mrps23	5.37815e-40	0.284792	0.643	0.32	8.30009e-36	0
	Ubb	5.80186e-40	0.355413	1	1	8.95401e-36	0
	Ctla4	5.99814e-40	0.284756	0.307	0.089	9.25693e-36	0
	Ptp4a3	6.06193e-40	0.338251	0.695	0.389	9.35537e-36	0
	Polr2g	6.18201e-40	0.299704	0.807	0.516	9.54069e-36	0
	Stoml2	8.16655e-40	0.288231	0.606	0.3	1.26034e-35	0
	Vdac3	9.28959e-40	0.29403	0.884	0.754	1.43366e-35	0
	Gars	1.70473e-39	0.284672	0.602	0.291	2.6309e-35	0
	Chordc1	1.71557e-39	0.299997	0.606	0.299	2.64764e-35	0
	Nedd8	1.9031e-39	0.259427	0.99	0.966	2.93705e-35	0
	Ube2g1	1.96762e-39	0.258227	0.494	0.209	3.03662e-35	0
	Timm22	2.21695e-39	0.254437	0.496	0.212	3.42142e-35	0
	Rasgrp1	2.3041e-39	0.316375	0.578	0.268	3.55591e-35	0
	Ppa2	2.84101e-39	0.260135	0.478	0.2	4.38453e-35	0
	Mrpl55	3.01351e-39	0.254974	0.528	0.236	4.65075e-35	0
	Rbm28	3.76553e-39	0.302539	0.663	0.345	5.81134e-35	0
	Sin3b	3.81118e-39	0.328528	0.916	0.831	5.88179e-35	0
	Mrpl15	4.253e-39	0.347941	0.723	0.451	6.56365e-35	0
	Hnrnpl	4.35735e-39	0.304922	0.91	0.759	6.7247e-35	0
	Fam78a	5.6103e-39	0.279644	0.418	0.162	8.65837e-35	0
	Etfa	6.46937e-39	0.288644	0.629	0.313	9.98418e-35	0
	Rps19	6.4795e-39	0.254678	1	1	9.99981e-35	0
	Srsf6	9.24005e-39	0.319855	0.9	0.808	1.42602e-34	0
	Med4	1.15446e-38	0.2608	0.526	0.236	1.78168e-34	0
	Csnk2b	1.41301e-38	0.284649	0.896	0.765	2.1807e-34	0
	Cxxc5	1.56573e-38	0.250369	0.367	0.129	2.4164e-34	0
	Skiv2l2	1.76875e-38	0.273188	0.51	0.227	2.7297e-34	0
	Trim33	1.92172e-38	0.250103	0.538	0.239	2.96579e-34	0
	Ncbp2	1.93963e-38	0.278424	0.532	0.243	2.99342e-34	0
	Lgals1	2.07914e-38	0.355376	0.976	0.887	3.20873e-34	0
	Pycard	2.18982e-38	0.378278	0.962	0.9	3.37955e-34	0
	Smu1	2.84388e-38	0.290464	0.655	0.354	4.38896e-34	0
	Brcc3	3.40817e-38	0.251788	0.454	0.187	5.25982e-34	0
	Chd1	4.16096e-38	0.340016	0.813	0.574	6.42161e-34	0
	Trir	6.05321e-38	0.287828	0.952	0.903	9.34192e-34	0
	Eci2	6.43725e-38	0.27844	0.554	0.261	9.93461e-34	0
	Itpr2	7.1532e-38	0.350867	0.779	0.555	1.10395e-33	0
	Cd24a	8.34754e-38	0.318664	0.904	0.736	1.28828e-33	0
	Cnp	9.62286e-38	0.309334	0.711	0.419	1.4851e-33	0
	Eef1d	1.02687e-37	0.284192	0.982	0.945	1.58477e-33	0
	Cbfb	1.03707e-37	0.278314	0.653	0.33	1.60052e-33	0
	Limd2	1.05743e-37	0.316774	0.964	0.845	1.63193e-33	0
	Polr2h	1.09239e-37	0.266975	0.494	0.218	1.68589e-33	0
	Ppie	1.56762e-37	0.274322	0.486	0.211	2.41931e-33	0
	Reep4	1.5702e-37	0.257287	0.408	0.157	2.4233e-33	0
	Trmt112	1.7485e-37	0.274885	0.928	0.84	2.69846e-33	0
	Egln1	2.01452e-37	0.297593	0.612	0.31	3.10901e-33	0
	Pank2	2.4235e-37	0.275278	0.558	0.269	3.74018e-33	0
	Abt1	2.57092e-37	0.251668	0.486	0.207	3.96769e-33	0
	Ablim1	3.02087e-37	0.33039	0.725	0.412	4.66212e-33	0
	Uri1	3.02358e-37	0.268294	0.49	0.217	4.66629e-33	0
	Cetn2	3.4079e-37	0.299663	0.61	0.321	5.25942e-33	0
	Kdm1a	4.6985e-37	0.263168	0.659	0.34	7.25119e-33	0
	Sp3	5.56142e-37	0.276007	0.631	0.319	8.58295e-33	0
	Bola1	1.06201e-36	0.272597	0.466	0.204	1.639e-32	0
	Smg6	1.51552e-36	0.27858	0.548	0.258	2.33891e-32	0
	Sfxn1	1.96069e-36	0.273235	0.464	0.198	3.02593e-32	0
	Ctbp1	2.00219e-36	0.325367	0.803	0.597	3.08998e-32	0
	Prpf4b	2.01474e-36	0.305372	0.914	0.81	3.10935e-32	0
	Cops6	2.15936e-36	0.304747	0.715	0.441	3.33254e-32	0
	Helz	2.28872e-36	0.269764	0.606	0.3	3.53218e-32	0
	Adss	2.30294e-36	0.281544	0.687	0.386	3.55413e-32	0
	Abracl	2.64446e-36	0.273298	0.986	0.95	4.08119e-32	0
	Cops5	2.90106e-36	0.291026	0.606	0.314	4.4772e-32	0
	Mfap1a	3.09651e-36	0.26346	0.53	0.247	4.77884e-32	0
	Eif3k	3.2688e-36	0.252803	0.988	0.967	5.04474e-32	0
	Dnajc19	3.3386e-36	0.295421	0.789	0.558	5.15246e-32	0
	Srsf11	4.16735e-36	0.27886	0.954	0.881	6.43147e-32	0
	Pfdn4	4.72202e-36	0.271677	0.574	0.288	7.2875e-32	0
	Mrps24	5.78763e-36	0.256983	0.912	0.818	8.93205e-32	0
	Adh5	6.80119e-36	0.309343	0.743	0.486	1.04963e-31	0
	Wapl	7.55301e-36	0.334372	0.867	0.719	1.16566e-31	0
	Kras	7.62926e-36	0.321479	0.898	0.776	1.17742e-31	0
	Mtch1	7.69792e-36	0.319428	0.843	0.712	1.18802e-31	0
	Zfp91	9.77851e-36	0.31659	0.89	0.769	1.50912e-31	0
	Gatad1	1.36102e-35	0.277312	0.695	0.396	2.10046e-31	0
	Tomm70a	1.51709e-35	0.276395	0.568	0.278	2.34132e-31	0
	Pcbp1	1.69684e-35	0.257879	0.966	0.894	2.61873e-31	0
	Prpf19	1.86629e-35	0.254846	0.5	0.228	2.88024e-31	0
	Fcf1	1.96873e-35	0.276462	0.633	0.34	3.03834e-31	0
	Med10	2.48538e-35	0.268656	0.691	0.391	3.83569e-31	0
	Hnrnpul1	2.52126e-35	0.324529	0.821	0.615	3.89107e-31	0
	Gm5914	2.72291e-35	0.271668	0.468	0.201	4.20226e-31	0
	Mrps25	3.21372e-35	0.259206	0.6	0.304	4.95973e-31	0
	C1qbp	3.21518e-35	0.547319	0.735	0.568	4.96198e-31	0
	Tomm40	4.45851e-35	0.287894	0.57	0.291	6.88082e-31	0
	Gabpb2	4.46736e-35	0.266968	0.602	0.301	6.89448e-31	0
	Pnkd	4.5364e-35	0.250977	0.57	0.279	7.00103e-31	0
	Pitpnb	5.23747e-35	0.2667	0.526	0.253	8.08299e-31	0
	Ndufa9	6.65569e-35	0.273447	0.61	0.32	1.02717e-30	0
	Cdc37	6.80072e-35	0.275659	0.91	0.831	1.04956e-30	0
	Fubp1	7.44018e-35	0.322879	0.886	0.779	1.14824e-30	0
	Snrpb2	7.88817e-35	0.30194	0.715	0.44	1.21738e-30	0
	Nubp1	8.59992e-35	0.258414	0.641	0.341	1.32723e-30	0
	Mrfap1	1.15132e-34	0.250684	0.976	0.922	1.77684e-30	0
	Scd2	1.27888e-34	0.286181	0.606	0.305	1.9737e-30	0
	Psmd3	1.31551e-34	0.285168	0.709	0.433	2.03022e-30	0
	Dcun1d5	1.33153e-34	0.262847	0.894	0.755	2.05495e-30	0
	Naa38	1.44295e-34	0.280496	0.689	0.406	2.22691e-30	0
	Nr3c1	1.69577e-34	0.359794	0.823	0.619	2.61708e-30	0
	Bclaf1	1.73849e-34	0.292312	0.954	0.874	2.68302e-30	0
	Sdhb	1.99029e-34	0.296485	0.878	0.752	3.07162e-30	0
	Hsdl1	2.15145e-34	0.260847	0.474	0.212	3.32033e-30	0
	Cwc15	2.38528e-34	0.271443	0.914	0.856	3.68121e-30	0
	Cpsf6	2.39703e-34	0.284241	0.747	0.475	3.69934e-30	0
	Tra2b	3.33935e-34	0.267623	0.99	0.944	5.15362e-30	0
	Tia1	3.67726e-34	0.299589	0.741	0.46	5.67511e-30	0
	Akirin2	3.73149e-34	0.310778	0.596	0.325	5.75881e-30	0
	Glod4	5.91449e-34	0.254489	0.576	0.293	9.12784e-30	0
	Lgals9	6.22374e-34	0.349531	0.763	0.535	9.6051e-30	0
	Mrpl32	8.48529e-34	0.291961	0.699	0.43	1.30954e-29	0
	Znrf1	1.21731e-33	0.32252	0.769	0.505	1.87868e-29	0
	Atp5g1	1.48292e-33	0.365385	0.944	0.93	2.28859e-29	0
	Rabgap1l	1.50088e-33	0.299745	0.653	0.36	2.31631e-29	0
	Il21r	1.59859e-33	0.257503	0.594	0.296	2.4671e-29	0
	Dda1	1.76342e-33	0.269934	0.641	0.36	2.72148e-29	0
	Zmat2	1.91554e-33	0.260767	0.863	0.698	2.95625e-29	0
	Hnrnpdl	2.39561e-33	0.289036	0.896	0.804	3.69715e-29	0
	Ube2v2	2.41862e-33	0.250562	0.645	0.345	3.73266e-29	0
	Wdr61	2.47688e-33	0.283031	0.556	0.285	3.82256e-29	0
	Psmb3	2.53791e-33	0.271343	0.96	0.916	3.91676e-29	0
	Smarcc2	3.31161e-33	0.261829	0.61	0.317	5.11081e-29	0
	Hspe1	4.82594e-33	0.427454	0.97	0.942	7.44787e-29	0
	Gm47283	4.94325e-33	0.359919	0.934	0.88	7.62892e-29	0
	Pcnp	4.96411e-33	0.302935	0.787	0.566	7.66111e-29	0
	Psmd6	5.51157e-33	0.299104	0.777	0.536	8.50601e-29	0
	Timm13	6.46344e-33	0.266046	0.938	0.872	9.97503e-29	0
	Prrc2c	7.82388e-33	0.257732	0.98	0.945	1.20746e-28	0
	Dhx36	8.1966e-33	0.285247	0.725	0.453	1.26498e-28	0
	Rcsd1	1.0566e-32	0.310841	0.819	0.613	1.63065e-28	0
	Nhp2	1.12888e-32	0.370519	0.747	0.533	1.7422e-28	0
	Cdk6	1.29325e-32	0.505124	0.602	0.336	1.99587e-28	0
	Hmgcr	1.48611e-32	0.265832	0.594	0.306	2.29351e-28	0
	Naa50	3.59658e-32	0.277523	0.719	0.464	5.5506e-28	0
	U2af2	3.74205e-32	0.290857	0.741	0.494	5.7751e-28	0
	Brd7	4.28882e-32	0.295326	0.803	0.598	6.61893e-28	0
	Knop1	4.632e-32	0.252756	0.594	0.308	7.14857e-28	0
	Eif4a1	4.77086e-32	0.276159	0.992	0.981	7.36287e-28	0
	Rag1	4.99296e-32	0.50436	0.707	0.472	7.70563e-28	0
	Ppp4r3a	6.34063e-32	0.261117	0.594	0.313	9.7855e-28	0
	Eftud2	7.70222e-32	0.251841	0.474	0.224	1.18868e-27	0
	Abcf1	7.75807e-32	0.299861	0.815	0.659	1.1973e-27	0
	Rfxap	8.29638e-32	0.253133	0.546	0.275	1.28038e-27	0
	Ppp1r16b	8.90002e-32	0.262892	0.5	0.235	1.37354e-27	0
	Ebna1bp2	1.05813e-31	0.3329	0.655	0.422	1.63302e-27	0
	Safb	1.33504e-31	0.296523	0.713	0.451	2.06036e-27	0
	Ahsa1	1.34922e-31	0.307442	0.741	0.516	2.08224e-27	0
	Edem1	1.37476e-31	0.312401	0.871	0.756	2.12167e-27	0
	Eif3b	1.56586e-31	0.314369	0.665	0.404	2.41659e-27	0
	Rwdd1	1.81992e-31	0.253772	0.882	0.763	2.80868e-27	0
	Pgk1	2.09029e-31	0.265207	0.902	0.767	3.22595e-27	0
	Smchd1	2.64698e-31	0.281674	0.906	0.799	4.08508e-27	0
	Dynll1	2.90273e-31	0.310585	0.976	0.957	4.47979e-27	0
	Psmc5	4.83159e-31	0.267073	0.847	0.685	7.4566e-27	0
	Ndufb4	5.42987e-31	0.250085	0.918	0.86	8.37992e-27	0
	Psma5	6.05304e-31	0.261398	0.869	0.762	9.34165e-27	0
	Id3	6.50895e-31	0.268109	0.618	0.349	1.00453e-26	0
	Eif3l	6.7523e-31	0.271124	0.731	0.481	1.04208e-26	0
	Ndufa10	8.78699e-31	0.281785	0.761	0.521	1.3561e-26	0
	Zcrb1	1.04107e-30	0.258973	0.89	0.741	1.60668e-26	0
	Cirbp	1.14555e-30	0.30729	0.791	0.585	1.76793e-26	0
	Fam133b	1.19315e-30	0.262783	0.689	0.42	1.84139e-26	0
	Tbrg1	1.72891e-30	0.280942	0.747	0.482	2.66822e-26	0
	Naa15	1.82302e-30	0.266649	0.643	0.367	2.81347e-26	0
	Chd3	2.11504e-30	0.288882	0.631	0.356	3.26415e-26	0
	Atp13a3	3.95427e-30	0.293707	0.713	0.461	6.10262e-26	0
	Appl1	7.14112e-30	0.262812	0.58	0.31	1.10209e-25	0
	Eef1g	7.66839e-30	0.324032	0.964	0.953	1.18346e-25	0
	Cnbp	1.15163e-29	0.257094	0.97	0.937	1.77731e-25	0
	Srek1	1.2022e-29	0.258832	0.653	0.382	1.85535e-25	0
	Pcif1	2.01369e-29	0.273422	0.667	0.407	3.10773e-25	0
	Eif1b	2.20619e-29	0.294186	0.823	0.636	3.40482e-25	0
	Commd3	2.22411e-29	0.268073	0.729	0.481	3.43248e-25	0
	Uqcrc2	2.28883e-29	0.283618	0.811	0.659	3.53235e-25	0
	Rb1	2.42394e-29	0.262677	0.528	0.275	3.74087e-25	0
	Cfdp1	3.22091e-29	0.271447	0.741	0.513	4.97083e-25	0
	Usp7	5.99376e-29	0.266179	0.803	0.586	9.25017e-25	0
	Timm8b	7.46076e-29	0.272378	0.791	0.603	1.15142e-24	0
	Snrnp48	9.53188e-29	0.250507	0.631	0.357	1.47106e-24	0
	Immt	1.52367e-28	0.259968	0.705	0.454	2.35149e-24	0
	Pcmt1	1.85711e-28	0.262032	0.737	0.494	2.86607e-24	0
	Ssbp1	2.48881e-28	0.277707	0.709	0.469	3.84098e-24	0
	Ndufs3	3.17338e-28	0.254656	0.737	0.482	4.89748e-24	0
	Polr2f	3.65704e-28	0.323547	0.789	0.618	5.6439e-24	0
	Usp34	4.8201e-28	0.282128	0.823	0.656	7.43885e-24	0
	Gimap1	7.22628e-28	0.281386	0.61	0.331	1.11523e-23	0
	Trp53inp1	1.09291e-27	0.252884	0.596	0.32	1.68669e-23	0
	Anapc13	1.40837e-27	0.256512	0.805	0.642	2.17354e-23	0
	Ccng2	1.53913e-27	0.259413	0.442	0.211	2.37534e-23	0
	Nxf1	3.38035e-27	0.26325	0.817	0.664	5.21689e-23	0
	Ak2	3.52094e-27	0.265183	0.751	0.558	5.43387e-23	0
	Phb2	3.75591e-27	0.304576	0.845	0.799	5.7965e-23	0
	Kcnq1ot1	6.47585e-27	0.41021	0.719	0.552	9.99418e-23	0
	Cntrl	9.29035e-27	0.260369	0.677	0.435	1.43378e-22	0
	Frg1	1.43428e-26	0.265696	0.783	0.602	2.21352e-22	0
	Mrto4	3.03265e-26	0.299813	0.508	0.282	4.68029e-22	0
	Mrpl36	3.27286e-26	0.267503	0.721	0.501	5.05101e-22	0
	Ola1	4.13136e-26	0.2537	0.705	0.468	6.37593e-22	0
	Trac	6.22246e-26	0.260289	0.468	0.223	9.60312e-22	0
	Phb	1.12427e-25	0.291768	0.59	0.352	1.73509e-21	0
	Pdrg1	1.34248e-25	0.254442	0.45	0.23	2.07185e-21	0
	Ubn1	1.94546e-25	0.262048	0.811	0.624	3.00243e-21	0
	Elavl1	2.82543e-25	0.255969	0.737	0.521	4.36049e-21	0
	Gm11808	3.86735e-25	0.254751	0.89	0.831	5.96848e-21	0
	Snrnp200	5.6396e-25	0.255573	0.594	0.356	8.7036e-21	0
	Tomm5	5.67044e-25	0.301325	0.791	0.654	8.75119e-21	0
	Snrnp27	7.49973e-25	0.266668	0.749	0.556	1.15743e-20	0
	Clk3	1.20369e-24	0.264742	0.683	0.456	1.85765e-20	0
	Uqcc2	1.20788e-24	0.296154	0.807	0.724	1.86412e-20	0
	Cyc1	9.35388e-24	0.274324	0.761	0.603	1.44358e-19	0
	Polr2l	1.05103e-23	0.284777	0.719	0.53	1.62206e-19	0
	Ccar1	2.96538e-23	0.25751	0.755	0.582	4.57646e-19	0
	Tuba4a	3.59149e-23	0.28592	0.452	0.236	5.54275e-19	0
	Usp3	3.20641e-22	0.269385	0.679	0.467	4.94845e-18	0
	Psmd7	3.86843e-22	0.253646	0.773	0.6	5.97015e-18	0
	Ddx18	9.18747e-22	0.262465	0.602	0.392	1.4179e-17	0
	Srm	1.02466e-21	0.303365	0.339	0.165	1.58135e-17	0
	Hspa9	1.97823e-21	0.308304	0.633	0.428	3.053e-17	0
	Cd4	5.78552e-21	0.254723	0.476	0.257	8.92879e-17	0
	Fbl	1.01534e-20	0.287593	0.721	0.554	1.56697e-16	0
	Wdr43	7.27605e-20	0.25528	0.498	0.295	1.12291e-15	0
	Pdcd4	8.48707e-20	0.281012	0.878	0.828	1.30981e-15	0
	Arl6ip1	4.39511e-18	0.558875	0.9	0.956	6.78298e-14	0
	Tubb2a	4.13281e-17	0.341356	0.723	0.662	6.37817e-13	0
	Mia2	4.16627e-12	0.267869	0.809	0.777	6.42981e-08	0
	Ms4a1	7.57486e-104	0.827544	0.752	0.25	1.16903e-99	1
	Ebf1	1.64851e-103	0.936116	0.795	0.3	2.54415e-99	1
	Cd79a	3.76317e-97	1.14031	0.874	0.482	5.8077e-93	1
	Cd79b	4.74233e-97	0.91472	0.846	0.413	7.31883e-93	1
	Ighm	3.61216e-85	0.924349	0.985	0.837	5.57464e-81	1
	Igkc	8.08379e-84	1.33423	0.917	0.662	1.24757e-79	1
	Gimap6	2.80031e-82	0.648478	0.827	0.405	4.32171e-78	1
	Iglc2	7.10596e-78	0.736266	0.707	0.275	1.09666e-73	1
	Ighd	2.42538e-77	0.801549	0.564	0.181	3.74309e-73	1
	Fcmr	7.26844e-70	0.710429	0.532	0.17	1.12174e-65	1
	Mzb1	1.30307e-67	0.573239	0.536	0.17	2.01103e-63	1
	C1qb	2.02968e-66	0.767626	0.831	0.535	3.13241e-62	1
	Pax5	4.35965e-66	0.415773	0.462	0.129	6.72825e-62	1
	Gm31243	2.37782e-63	0.428394	0.442	0.124	3.66969e-59	1
	Bank1	4.35106e-63	0.569239	0.553	0.195	6.71499e-59	1
	Iglc3	2.7699e-62	0.568154	0.553	0.193	4.27478e-58	1
	C1qa	2.33307e-61	0.789114	0.784	0.486	3.60062e-57	1
	C1qc	4.81607e-61	0.735874	0.78	0.472	7.43264e-57	1
	Rps27	1.02924e-60	0.41927	1	1	1.58843e-56	1
	Cd37	2.20751e-60	0.529258	0.94	0.653	3.40685e-56	1
	Cd55	3.56551e-59	0.532147	0.511	0.176	5.50266e-55	1
	Gm8369	4.07642e-58	0.503992	0.466	0.148	6.29113e-54	1
	Selenop	4.53077e-57	0.727589	0.848	0.567	6.99234e-53	1
	Ly6d	2.20832e-56	0.464828	0.974	0.734	3.4081e-52	1
	Pou2af1	1.04168e-55	0.366263	0.393	0.107	1.60763e-51	1
	Ablim1	5.99043e-55	0.427502	0.784	0.405	9.24503e-51	1
	Gimap1	9.20878e-54	0.457873	0.675	0.322	1.42119e-49	1
	H2-DMb2	2.28981e-51	0.445	0.665	0.3	3.53387e-47	1
	Gimap4	1.65067e-50	0.325788	0.393	0.116	2.54748e-46	1
	Gimap3	1.13291e-49	0.357698	0.429	0.139	1.74842e-45	1
	Rps24	2.12074e-49	0.393462	1	1	3.27294e-45	1
	Fcrla	4.50052e-49	0.399024	0.489	0.176	6.94565e-45	1
	Cd19	8.21222e-49	0.357983	0.417	0.135	1.26739e-44	1
	Cd22	1.28145e-47	0.359721	0.417	0.135	1.97766e-43	1
	Iglc1	2.35687e-47	0.652433	0.393	0.124	3.63736e-43	1
	S1pr1	2.44128e-47	0.388025	0.442	0.155	3.76762e-43	1
	Rpl37a	1.83919e-46	0.330052	1	1	2.83842e-42	1
	Ms4a7	2.03136e-46	0.485668	0.513	0.195	3.135e-42	1
	Fcer2a	1.08218e-45	0.446319	0.376	0.121	1.67013e-41	1
	Ltb	4.86872e-45	0.398905	0.874	0.557	7.5139e-41	1
	Pf4	1.28726e-44	0.5891	0.417	0.142	1.98662e-40	1
	Ralgps2	1.95336e-44	0.434343	0.675	0.346	3.01462e-40	1
	Mef2c	9.94815e-44	0.515903	0.878	0.624	1.5353e-39	1
	H2-Ob	1.35489e-42	0.459532	0.575	0.261	2.09101e-38	1
	Vpreb3	1.50287e-42	0.406261	0.31	0.086	2.31938e-38	1
	Tnfrsf13c	1.56163e-42	0.292912	0.318	0.089	2.41007e-38	1
	Scd1	2.85545e-42	0.416243	0.511	0.212	4.40681e-38	1
	Cr2	3.26493e-42	0.275546	0.284	0.072	5.03876e-38	1
	Ly6a	7.2939e-42	0.380702	0.784	0.463	1.12567e-37	1
	Rpl30	9.21489e-42	0.318186	1	1	1.42213e-37	1
	Man1a	1.84067e-41	0.385621	0.754	0.444	2.84071e-37	1
	Cd2	3.40318e-40	0.404547	0.583	0.27	5.25213e-36	1
	Cd72	2.42587e-38	0.259159	0.697	0.349	3.74384e-34	1
	Gimap5	4.19626e-38	0.305856	0.391	0.143	6.47608e-34	1
	Ptpn18	8.21091e-37	0.335746	0.987	0.937	1.26719e-32	1
	Rpl38	2.00689e-36	0.324831	1	1	3.09724e-32	1
	Rpl34	2.32279e-36	0.293995	1	1	3.58476e-32	1
	Rpl36	3.14806e-36	0.304187	1	0.998	4.85841e-32	1
	Rps7	1.82728e-35	0.320944	1	1	2.82004e-31	1
	Acp5	2.29197e-35	0.259397	0.75	0.437	3.5372e-31	1
	Rps21	1.32672e-34	0.281331	1	1	2.04753e-30	1
	Rag1	1.46474e-34	0.490554	0.739	0.469	2.26053e-30	1
	Maf	1.76426e-34	0.494756	0.464	0.206	2.72278e-30	1
	Rpl18a	2.94239e-34	0.305713	1	1	4.54099e-30	1
	Shisa5	3.02262e-34	0.350622	0.985	0.843	4.66481e-30	1
	Pkig	1.22427e-33	0.3595	0.776	0.53	1.88941e-29	1
	Rps20	2.00831e-33	0.318696	1	1	3.09943e-29	1
	Ptprcap	2.73596e-33	0.341878	0.947	0.734	4.22241e-29	1
	Foxp1	5.50433e-33	0.330914	0.955	0.832	8.49483e-29	1
	Arap2	7.39306e-33	0.319096	0.474	0.221	1.14097e-28	1
	Trac	9.57148e-33	0.440973	0.479	0.224	1.47717e-28	1
	Rps15a	1.31158e-32	0.314596	0.998	1	2.02416e-28	1
	Tspan32	1.56351e-32	0.298618	0.474	0.217	2.41296e-28	1
	Ets1	1.62867e-32	0.313991	0.953	0.735	2.51353e-28	1
	Cd74	2.44499e-32	0.279145	0.996	0.869	3.77335e-28	1
	Cd69	2.95518e-32	0.359577	0.673	0.379	4.56073e-28	1
	Pou2f2	4.21714e-32	0.281723	0.885	0.62	6.50831e-28	1
	Gm30211	6.89319e-32	0.287045	0.263	0.079	1.06383e-27	1
	Txk	8.72482e-32	0.481264	0.56	0.307	1.3465e-27	1
	Trem2	3.81635e-31	0.336856	0.451	0.194	5.88978e-27	1
	C3ar1	6.92802e-31	0.285995	0.459	0.195	1.0692e-26	1
	Ctsc	9.24582e-31	0.311768	0.964	0.796	1.42691e-26	1
	Mrc1	9.6088e-31	0.423602	0.491	0.224	1.48293e-26	1
	Ccr9	1.15793e-30	0.412633	0.733	0.466	1.78703e-26	1
	Blnk	1.97147e-30	0.288371	0.506	0.243	3.04256e-26	1
	Rps29	2.05145e-30	0.25592	1	1	3.166e-26	1
	Rpl19	2.31528e-30	0.269479	1	1	3.57317e-26	1
	Jakmip1	2.71465e-30	0.292391	0.447	0.203	4.18952e-26	1
	Rpl23	4.32584e-30	0.27078	1	1	6.67608e-26	1
	Selenow	1.5743e-29	0.273211	0.972	0.919	2.42962e-25	1
	Pdcd4	5.06549e-29	0.28873	0.947	0.815	7.81756e-25	1
	Rps13	5.80462e-29	0.275922	1	1	8.95826e-25	1
	Cd81	1.86093e-28	0.307849	0.861	0.643	2.87198e-24	1
	Cd27	2.2972e-28	0.391475	0.654	0.391	3.54527e-24	1
	Rpl37	2.48862e-28	0.275636	1	1	3.84069e-24	1
	Rps10	3.91672e-28	0.254155	1	1	6.04468e-24	1
	Rpl9	7.14665e-28	0.27058	1	1	1.10294e-23	1
	Aif1	1.36023e-27	0.283992	0.645	0.359	2.09925e-23	1
	Rps5	2.01992e-27	0.280269	1	0.999	3.11734e-23	1
	Pold4	3.62043e-27	0.321561	0.793	0.569	5.58741e-23	1
	Chrna9	3.9551e-27	0.275547	0.346	0.144	6.10391e-23	1
	Rpl39	7.41577e-27	0.293503	1	1	1.14448e-22	1
	Rpl35a	1.49531e-26	0.258166	1	1	2.30771e-22	1
	Mxd4	1.71576e-26	0.316019	0.677	0.425	2.64794e-22	1
	Satb1	2.23238e-26	0.338222	0.919	0.759	3.44524e-22	1
	Ifi203	1.09444e-25	0.279273	0.887	0.687	1.68905e-21	1
	Siglecg	1.63752e-25	0.25329	0.483	0.238	2.52718e-21	1
	Ifi27l2a	1.81061e-25	0.285244	0.998	0.87	2.79432e-21	1
	Rpl13	3.48363e-25	0.256042	1	1	5.37629e-21	1
	Rpl32	4.37229e-25	0.27784	1	0.999	6.74775e-21	1
	Stab1	4.57682e-25	0.398455	0.391	0.18	7.0634e-21	1
	Rps19	7.32806e-25	0.27131	1	1	1.13094e-20	1
	Ly86	1.02721e-24	0.252971	0.964	0.787	1.58529e-20	1
	Itm2b	1.0457e-24	0.266331	1	0.997	1.61383e-20	1
	Ptp4a3	1.046e-24	0.273153	0.658	0.4	1.61429e-20	1
	Snx5	3.49057e-24	0.287631	0.887	0.772	5.387e-20	1
	Chchd10	5.58528e-24	0.250893	0.318	0.136	8.61977e-20	1
	Snx2	1.58361e-23	0.273124	0.782	0.579	2.44399e-19	1
	Tmem243	2.30447e-23	0.282175	0.596	0.365	3.5565e-19	1
	Cd8b1	4.74107e-23	0.35953	0.827	0.665	7.3169e-19	1
	Traf3ip3	5.09475e-23	0.277741	0.558	0.332	7.86273e-19	1
	Gm15340	5.33331e-23	0.303338	0.344	0.157	8.2309e-19	1
	Cd4	7.02141e-23	0.363506	0.476	0.259	1.08361e-18	1
	Grap	1.46903e-22	0.258553	0.402	0.202	2.26716e-18	1
	Ikzf3	2.30005e-21	0.257876	0.442	0.236	3.54967e-17	1
	Hvcn1	2.11763e-20	0.252835	0.423	0.221	3.26813e-16	1
	Hist3h2ba	2.25566e-19	0.299722	0.449	0.252	3.48116e-15	1
	Rasgrp1	2.33455e-19	0.251828	0.494	0.289	3.60292e-15	1
	Cx3cr1	6.25161e-19	0.33095	0.464	0.254	9.64811e-15	1
	Zfp318	8.8453e-19	0.257808	0.359	0.185	1.3651e-14	1
	Themis	1.32651e-18	0.314349	0.56	0.35	2.0472e-14	1
	Tespa1	6.23975e-18	0.267195	0.485	0.291	9.6298e-14	1
	Uba52	1.01818e-17	0.256621	0.998	0.995	1.57136e-13	1
	Rhoh	3.89675e-17	0.256083	0.904	0.743	6.01385e-13	1
	Cd3e	3.7365e-15	0.257556	0.735	0.546	5.76655e-11	1
	Cd3d	5.44937e-15	0.267921	0.799	0.635	8.41001e-11	1
	Tctex1d1	1.15469e-14	0.267478	0.325	0.181	1.78203e-10	1
	Mier1	2.63149e-14	0.299146	0.919	0.858	4.06118e-10	1
	AW112010	1.5073e-12	0.302141	0.436	0.285	2.32621e-08	1
	Cd209a	2.94239e-191	1.74356	0.734	0.096	4.541e-187	2
	Klrd1	2.89645e-185	1.63309	0.822	0.145	4.47009e-181	2
	Clec10a	1.14369e-119	1.3452	0.671	0.144	1.76506e-115	2
	Spint1	3.34255e-117	0.67325	0.533	0.078	5.15856e-113	2
	Ctnnd2	9.37276e-111	0.378971	0.372	0.032	1.4465e-106	2
	Napsa	1.30924e-109	1.18436	0.997	0.766	2.02054e-105	2
	Ddr1	4.80231e-105	0.452477	0.441	0.054	7.41141e-101	2
	Kmo	1.32214e-102	0.554082	0.569	0.106	2.04045e-98	2
	H2-Ab1	2.29278e-101	1.3466	0.967	0.824	3.53845e-97	2
	Syngr2	4.15455e-100	0.953866	0.98	0.692	6.41171e-96	2
	H2-DMa	2.99699e-98	0.898665	1	0.801	4.62526e-94	2
	Flt3	1.7292e-96	0.646882	0.612	0.129	2.66867e-92	2
	Cd74	7.26802e-96	1.11037	0.993	0.877	1.12167e-91	2
	H2-Aa	2.29444e-95	1.22805	0.967	0.813	3.54101e-91	2
	H2-DMb1	9.02089e-95	1.03787	0.984	0.681	1.39219e-90	2
	Gm2a	3.88458e-93	0.859595	0.993	0.806	5.99507e-89	2
	Ciita	4.43286e-92	0.86464	0.836	0.326	6.84124e-88	2
	H2-Eb1	6.06229e-92	1.26478	0.961	0.819	9.35593e-88	2
	Olfm1	1.21615e-87	0.795719	0.727	0.222	1.87688e-83	2
	Cd7	4.12916e-87	0.887932	0.438	0.068	6.37253e-83	2
	S100a4	4.5618e-87	1.18081	0.993	0.765	7.04023e-83	2
	Ffar2	7.85119e-85	0.493574	0.309	0.03	1.21167e-80	2
	Plbd1	3.14284e-81	0.73945	0.98	0.669	4.85035e-77	2
	Grasp	1.611e-80	0.724296	0.549	0.13	2.48625e-76	2
	Klrb1b	1.78979e-75	0.543982	0.421	0.074	2.76218e-71	2
	Bex6	1.28536e-72	0.308747	0.299	0.034	1.98369e-68	2
	Dpp4	1.17005e-69	0.613233	0.681	0.236	1.80574e-65	2
	Ifitm1	1.08733e-68	1.81935	0.618	0.203	1.67808e-64	2
	Itgax	4.06557e-68	0.625229	0.697	0.242	6.2744e-64	2
	Ccdc102a	2.79335e-67	0.349343	0.375	0.066	4.31098e-63	2
	Ccnd1	1.39822e-66	0.689673	0.658	0.211	2.15788e-62	2
	Cbfa2t3	1.66481e-66	0.676827	0.898	0.529	2.5693e-62	2
	Avpi1	2.03123e-65	0.615133	0.612	0.193	3.1348e-61	2
	Klrk1	1.29933e-63	0.621769	0.49	0.123	2.00526e-59	2
	Cfp	1.53905e-63	0.718953	0.931	0.604	2.37522e-59	2
	Fcor	1.69572e-63	0.346019	0.289	0.039	2.617e-59	2
	Ckb	2.41233e-63	0.858326	0.865	0.493	3.72295e-59	2
	Itgb7	4.93229e-62	0.651968	0.852	0.452	7.612e-58	2
	Traf1	1.27681e-61	0.781744	0.901	0.576	1.9705e-57	2
	Nectin1	1.08721e-60	0.367846	0.444	0.102	1.6779e-56	2
	Ifitm2	5.21394e-59	0.85956	0.993	0.814	8.04667e-55	2
	Gpr171	2.48843e-57	0.709416	0.766	0.382	3.84039e-53	2
	H2afy	2.26675e-54	0.560973	0.997	0.962	3.49827e-50	2
	Ctsh	3.32897e-54	0.588789	1	0.848	5.13759e-50	2
	Pkib	1.91283e-53	0.53192	0.648	0.242	2.95207e-49	2
	Slamf7	1.46522e-52	0.558567	0.664	0.253	2.26128e-48	2
	Runx3	1.97144e-52	0.608508	0.753	0.368	3.04252e-48	2
	H2-Oa	1.25627e-51	0.788381	0.602	0.235	1.93881e-47	2
	Tspo	1.93865e-50	0.562642	1	0.955	2.99192e-46	2
	Afdn	5.17397e-50	0.371205	0.414	0.109	7.98499e-46	2
	Bhlhe40	8.93692e-50	0.770779	0.809	0.462	1.37923e-45	2
	Tmem176a	1.0448e-49	0.810091	0.875	0.593	1.61244e-45	2
	Grk3	2.60194e-49	0.467885	0.648	0.24	4.01558e-45	2
	Plscr1	3.02531e-48	0.572554	0.523	0.182	4.66896e-44	2
	Fam49b	4.36948e-47	0.481404	0.993	0.915	6.74342e-43	2
	Cd244	4.71768e-47	0.378181	0.493	0.151	7.2808e-43	2
	Jak2	1.28978e-46	0.446043	0.711	0.315	1.99052e-42	2
	Bin1	1.87195e-46	0.469104	0.717	0.336	2.88898e-42	2
	Amz1	2.95524e-46	0.340549	0.434	0.125	4.56081e-42	2
	Nfkb1	3.35367e-46	0.619459	0.895	0.676	5.17572e-42	2
	Ank	4.6373e-46	0.325278	0.444	0.127	7.15674e-42	2
	Fyn	4.82901e-44	0.485073	0.661	0.296	7.45261e-40	2
	Pvr	6.10944e-44	0.515908	0.559	0.215	9.4287e-40	2
	Map3k14	1.10943e-43	0.453005	0.523	0.183	1.71218e-39	2
	Snx21	3.27152e-43	0.275731	0.309	0.067	5.04893e-39	2
	Rtn1	3.71441e-43	0.269357	0.289	0.059	5.73245e-39	2
	S100a6	3.83264e-43	0.530953	1	0.857	5.91491e-39	2
	Fam105a	7.00169e-43	0.510537	0.852	0.553	1.08057e-38	2
	I830077J02Rik	9.222e-43	0.386489	0.467	0.149	1.42323e-38	2
	Lsp1	1.02364e-42	0.517986	0.997	0.901	1.57978e-38	2
	Tbc1d4	1.72364e-42	0.773968	0.434	0.134	2.6601e-38	2
	Prcp	5.20921e-42	0.459639	0.882	0.557	8.03937e-38	2
	Cytip	5.37176e-42	0.462629	0.993	0.855	8.29024e-38	2
	Cd300a	8.46349e-42	0.622881	0.895	0.624	1.30617e-37	2
	Agpat4	2.43469e-41	0.442978	0.632	0.271	3.75745e-37	2
	1700025G04Rik	3.85747e-41	0.396429	0.566	0.223	5.95323e-37	2
	Zmiz2	5.27899e-41	0.438535	0.691	0.34	8.14707e-37	2
	Tmem176b	8.81523e-41	0.628804	0.888	0.64	1.36045e-36	2
	Fcgrt	1.10395e-40	0.477495	0.638	0.271	1.70372e-36	2
	Tbc1d9	1.48947e-40	0.342565	0.487	0.167	2.29869e-36	2
	Rin3	2.15357e-40	0.448437	0.707	0.343	3.3236e-36	2
	Tmem173	2.7039e-40	0.447735	0.586	0.245	4.17293e-36	2
	Cd52	5.63964e-40	0.504916	1	0.926	8.70365e-36	2
	Ass1	6.02612e-40	0.600156	0.602	0.261	9.30012e-36	2
	Gdi2	6.61932e-40	0.458805	0.984	0.952	1.02156e-35	2
	Tnip3	1.55558e-39	0.738959	0.645	0.299	2.40073e-35	2
	Nr4a3	1.94393e-39	0.518169	0.487	0.176	3.00007e-35	2
	Tnfsf9	1.56575e-38	0.776257	0.411	0.134	2.41642e-34	2
	Ccdc88a	3.22045e-38	0.526785	0.829	0.553	4.97012e-34	2
	Cd83	5.24129e-38	0.637074	0.878	0.674	8.08889e-34	2
	Ifitm3	7.07146e-38	0.627302	0.99	0.824	1.09134e-33	2
	Itpr1	1.12716e-37	0.471432	0.714	0.377	1.73955e-33	2
	Erp29	1.43149e-37	0.432366	0.984	0.932	2.20922e-33	2
	Il1r2	1.81725e-37	0.406036	0.589	0.225	2.80456e-33	2
	Map4k1	1.94573e-37	0.539648	0.536	0.23	3.00285e-33	2
	Atox1	2.50855e-37	0.599915	1	0.96	3.87145e-33	2
	St3gal4	3.29414e-37	0.393474	0.638	0.294	5.08384e-33	2
	Dnajb14	2.66263e-36	0.399379	0.655	0.308	4.10924e-32	2
	Cyth4	3.3745e-36	0.552477	0.921	0.719	5.20786e-32	2
	Cyp4f16	8.0482e-36	0.468106	0.424	0.149	1.24208e-31	2
	Mrpl52	9.58238e-36	0.481547	0.984	0.94	1.47885e-31	2
	Dock10	1.16479e-35	0.454306	0.928	0.722	1.79763e-31	2
	Slamf9	1.37922e-35	0.446609	0.609	0.257	2.12855e-31	2
	Fxyd5	1.59284e-35	0.513728	0.997	0.944	2.45824e-31	2
	S100a11	4.24652e-35	0.305947	0.997	0.882	6.55365e-31	2
	H2-DMb2	5.58306e-35	0.672247	0.628	0.328	8.61633e-31	2
	Sirpb1a	8.0821e-35	0.338194	0.309	0.083	1.24731e-30	2
	Pitpna	8.48254e-35	0.458341	0.977	0.952	1.30911e-30	2
	Jaml	1.06397e-34	0.372389	0.539	0.207	1.64203e-30	2
	Vrk1	1.51578e-34	0.475395	0.638	0.33	2.33931e-30	2
	Rel	1.51841e-34	0.55383	0.911	0.747	2.34336e-30	2
	Siglecg	1.80744e-34	0.49123	0.559	0.245	2.78942e-30	2
	Bcl11a	2.10482e-34	0.411633	0.52	0.211	3.24836e-30	2
	Ms4a4c	3.38714e-34	0.587433	0.803	0.51	5.22737e-30	2
	Pfkp	3.75984e-34	0.553021	0.73	0.433	5.80255e-30	2
	Cd48	9.5909e-34	0.439553	0.931	0.773	1.48016e-29	2
	Sh3bgrl3	9.68786e-34	0.383993	1	0.999	1.49513e-29	2
	F11r	1.36367e-33	0.418876	0.418	0.146	2.10455e-29	2
	Pak1	1.60246e-33	0.39093	0.484	0.194	2.47307e-29	2
	Dock4	2.42261e-33	0.350036	0.434	0.156	3.73881e-29	2
	Vim	1.14031e-32	0.531275	0.993	0.909	1.75984e-28	2
	Evi2a	1.21584e-32	0.427359	0.845	0.561	1.87641e-28	2
	Fgr	1.27102e-32	0.4402	0.753	0.449	1.96156e-28	2
	Pmaip1	1.33908e-32	0.55972	0.674	0.367	2.06661e-28	2
	Ppfia4	1.72268e-32	0.341791	0.474	0.179	2.65862e-28	2
	Galnt6	1.89705e-32	0.362711	0.398	0.14	2.92772e-28	2
	Naga	2.20768e-32	0.358041	0.569	0.247	3.40711e-28	2
	Dab2	2.83562e-32	0.600945	0.697	0.386	4.37621e-28	2
	Casp6	3.08485e-32	0.348009	0.454	0.178	4.76085e-28	2
	Gng10	5.16655e-32	0.251057	0.355	0.111	7.97353e-28	2
	Fh1	1.33998e-31	0.523473	0.579	0.301	2.06799e-27	2
	Bri3bp	1.35123e-31	0.335655	0.576	0.26	2.08536e-27	2
	Nav1	2.60321e-31	0.330763	0.523	0.215	4.01753e-27	2
	Malt1	4.21865e-31	0.592882	0.76	0.493	6.51064e-27	2
	Ctnna1	5.65904e-31	0.402175	0.645	0.328	8.7336e-27	2
	Bach2	6.27723e-31	0.320652	0.431	0.163	9.68766e-27	2
	Trappc5	7.63543e-31	0.394112	0.661	0.37	1.17838e-26	2
	Alcam	7.78733e-31	0.380275	0.737	0.402	1.20182e-26	2
	Lat2	1.21831e-30	0.344947	0.783	0.465	1.88022e-26	2
	Il13ra1	2.78743e-30	0.31771	0.576	0.258	4.30184e-26	2
	Rogdi	6.50916e-30	0.312806	0.395	0.141	1.00456e-25	2
	Stx7	7.78172e-30	0.401684	0.806	0.586	1.20095e-25	2
	Nfkbie	8.05872e-30	0.403472	0.618	0.307	1.2437e-25	2
	Lpp	8.97683e-30	0.302854	0.52	0.226	1.38539e-25	2
	Zbtb18	1.46169e-29	0.372393	0.48	0.206	2.25582e-25	2
	Wfdc17	2.78716e-29	0.403835	0.931	0.74	4.30142e-25	2
	Msn	7.46363e-29	0.325372	0.997	0.948	1.15186e-24	2
	Slc35c2	1.05999e-28	0.333715	0.566	0.27	1.63588e-24	2
	Tmsb10	1.13748e-28	0.481329	0.997	0.985	1.75547e-24	2
	Plekho1	1.2087e-28	0.375953	0.865	0.642	1.86539e-24	2
	Ctss	1.7989e-28	0.350569	1	0.862	2.77624e-24	2
	Pkp3	2.02047e-28	0.308889	0.441	0.177	3.11819e-24	2
	Lactb	2.06074e-28	0.353392	0.622	0.319	3.18035e-24	2
	Sulf2	3.146e-28	0.319914	0.414	0.16	4.85522e-24	2
	Spi1	3.1887e-28	0.402128	0.974	0.8	4.92112e-24	2
	Ms4a6c	3.76953e-28	0.349283	0.961	0.718	5.81751e-24	2
	Ywhah	4.75748e-28	0.453783	0.957	0.931	7.34222e-24	2
	Plekha1	5.5011e-28	0.296521	0.464	0.19	8.48984e-24	2
	Acer3	5.67419e-28	0.338421	0.714	0.38	8.75697e-24	2
	Gpr183	5.81215e-28	0.509466	0.697	0.396	8.96989e-24	2
	Wdfy4	6.26634e-28	0.342961	0.625	0.309	9.67084e-24	2
	Smim3	7.19095e-28	0.33933	0.51	0.229	1.10978e-23	2
	Marveld1	8.88987e-28	0.30601	0.332	0.112	1.37197e-23	2
	Dpy19l1	1.1919e-27	0.326576	0.464	0.197	1.83946e-23	2
	AA467197	1.4235e-27	0.742526	0.539	0.256	2.19689e-23	2
	H2-T23	1.54562e-27	0.397537	0.993	0.901	2.38536e-23	2
	Baz1a	1.56883e-27	0.344003	0.888	0.704	2.42117e-23	2
	Icosl	3.09848e-27	0.31516	0.411	0.162	4.78188e-23	2
	Dapp1	3.25718e-27	0.423767	0.701	0.425	5.02681e-23	2
	Actb	5.08621e-27	0.403972	1	1	7.84955e-23	2
	Ccnd2	6.20556e-27	0.512868	0.632	0.341	9.57704e-23	2
	Cd72	1.8849e-26	0.640489	0.648	0.377	2.90897e-22	2
	Trps1	1.96748e-26	0.343618	0.737	0.427	3.03641e-22	2
	Dennd4a	2.32449e-26	0.464689	0.924	0.751	3.58738e-22	2
	Ccr5	4.14815e-26	0.427124	0.645	0.356	6.40184e-22	2
	Mgst3	5.6118e-26	0.327793	0.464	0.206	8.66069e-22	2
	Rnh1	6.96015e-26	0.384227	0.895	0.711	1.07416e-21	2
	Sgk3	7.04524e-26	0.302097	0.589	0.3	1.08729e-21	2
	Gsn	7.0993e-26	0.279913	0.826	0.608	1.09564e-21	2
	Tmem238	7.2437e-26	0.270973	0.388	0.15	1.11792e-21	2
	Ikbkb	8.17933e-26	0.339215	0.875	0.672	1.26232e-21	2
	Tep1	1.14595e-25	0.375244	0.628	0.341	1.76855e-21	2
	Ier5l	1.22594e-25	0.276035	0.28	0.087	1.89199e-21	2
	Fosb	1.42393e-25	0.563263	0.868	0.716	2.19756e-21	2
	Fam69a	1.43055e-25	0.343873	0.579	0.296	2.20777e-21	2
	Snx20	2.96696e-25	0.352093	0.888	0.72	4.57891e-21	2
	Cysltr1	4.82486e-25	0.322633	0.434	0.186	7.44621e-21	2
	Rrad	6.87965e-25	0.35635	0.365	0.139	1.06174e-20	2
	Arl6ip5	7.33838e-25	0.350873	0.826	0.648	1.13253e-20	2
	Crlf2	8.75475e-25	0.396841	0.878	0.721	1.35112e-20	2
	H2-Ob	1.38346e-24	0.378199	0.566	0.282	2.1351e-20	2
	Etv3	3.87479e-24	0.477791	0.681	0.418	5.97997e-20	2
	Etv6	6.56982e-24	0.349277	0.546	0.286	1.01392e-19	2
	Cd47	8.02656e-24	0.298881	1	0.994	1.23874e-19	2
	Tspan13	1.00707e-23	0.402826	0.865	0.749	1.55421e-19	2
	Dpysl2	1.08096e-23	0.392002	0.74	0.502	1.66825e-19	2
	Akr7a5	1.14254e-23	0.275042	0.434	0.193	1.76329e-19	2
	Hfe	1.1485e-23	0.311659	0.53	0.252	1.77247e-19	2
	Clic1	1.16645e-23	0.261643	1	0.997	1.80018e-19	2
	Bcl2a1d	1.32341e-23	0.575151	0.753	0.54	2.04241e-19	2
	Plcg2	1.41336e-23	0.278561	0.628	0.331	2.18123e-19	2
	Ptger4	1.62574e-23	0.400001	0.562	0.295	2.50901e-19	2
	Scpep1	2.95596e-23	0.280119	0.592	0.305	4.56193e-19	2
	Gpr35	9.38361e-23	0.317313	0.523	0.257	1.44817e-18	2
	Atf6	1.09173e-22	0.352468	0.546	0.288	1.68486e-18	2
	Maff	1.12261e-22	0.282903	0.398	0.167	1.73252e-18	2
	Ppib	1.83968e-22	0.257212	0.993	0.98	2.83917e-18	2
	Rps11	1.9122e-22	0.271383	1	1	2.9511e-18	2
	Parp8	2.20167e-22	0.257543	0.438	0.194	3.39784e-18	2
	Phf11b	2.49997e-22	0.375934	0.572	0.311	3.85821e-18	2
	Cd2ap	3.14338e-22	0.403156	0.717	0.487	4.85118e-18	2
	Actg1	3.38717e-22	0.255829	1	1	5.22741e-18	2
	Btg2	4.47186e-22	0.357397	0.984	0.948	6.90143e-18	2
	Snx1	6.45992e-22	0.310187	0.589	0.335	9.96959e-18	2
	Cd86	6.98803e-22	0.441318	0.681	0.44	1.07846e-17	2
	H2-M3	8.69236e-22	0.292659	0.655	0.378	1.34149e-17	2
	Eva1b	9.1824e-22	0.320011	0.457	0.218	1.41712e-17	2
	Skap2	1.04794e-21	0.304661	0.908	0.688	1.61729e-17	2
	Cdc42	1.17749e-21	0.253688	1	0.995	1.81723e-17	2
	Orai1	1.54211e-21	0.345843	0.76	0.529	2.37994e-17	2
	Ly86	1.63708e-21	0.306709	0.97	0.797	2.5265e-17	2
	Ube2f	1.9592e-21	0.317667	0.625	0.373	3.02363e-17	2
	Nuak2	2.27824e-21	0.256503	0.438	0.201	3.516e-17	2
	Mical1	2.46237e-21	0.263661	0.497	0.247	3.80018e-17	2
	Bmp2k	2.77868e-21	0.298039	0.674	0.41	4.28833e-17	2
	Ppm1m	3.44015e-21	0.282569	0.507	0.264	5.30919e-17	2
	Ap1s2	3.5756e-21	0.39359	0.625	0.373	5.51822e-17	2
	Lmo2	1.34234e-20	0.273751	0.602	0.329	2.07164e-16	2
	Scimp	1.53521e-20	0.288536	0.487	0.233	2.36929e-16	2
	Rasgef1b	2.06507e-20	0.412104	0.454	0.222	3.18702e-16	2
	Smdt1	2.19886e-20	0.3426	0.977	0.97	3.39351e-16	2
	P2ry10	2.44824e-20	0.274394	0.569	0.309	3.77837e-16	2
	Pepd	2.52215e-20	0.30609	0.599	0.337	3.89243e-16	2
	Shtn1	2.97916e-20	0.251595	0.5	0.243	4.59774e-16	2
	Bmyc	3.6151e-20	0.308931	0.539	0.301	5.57918e-16	2
	Hexb	5.24402e-20	0.294254	0.842	0.658	8.09309e-16	2
	5031439G07Rik	5.34636e-20	0.303168	0.668	0.406	8.25104e-16	2
	Mycbp2	5.71566e-20	0.401071	0.875	0.812	8.82098e-16	2
	Fam129a	5.8621e-20	0.304424	0.671	0.389	9.04698e-16	2
	Coro2a	7.34452e-20	0.296883	0.48	0.247	1.13348e-15	2
	Nr4a2	8.16767e-20	0.484109	0.579	0.339	1.26052e-15	2
	Cnpy3	1.21177e-19	0.273308	0.618	0.357	1.87012e-15	2
	Smad7	1.72002e-19	0.330584	0.586	0.337	2.6545e-15	2
	Pip4k2a	2.35745e-19	0.332131	0.842	0.713	3.63825e-15	2
	Pmvk	2.37974e-19	0.317613	0.418	0.203	3.67266e-15	2
	Prr7	2.43745e-19	0.269443	0.299	0.118	3.76172e-15	2
	Mvp	2.70087e-19	0.262828	0.615	0.357	4.16826e-15	2
	Ptpn6	3.01982e-19	0.264491	0.951	0.865	4.66049e-15	2
	Flot1	3.41454e-19	0.302829	0.503	0.275	5.26966e-15	2
	Ccr2	6.11067e-19	0.399917	0.812	0.627	9.43059e-15	2
	Picalm	7.59419e-19	0.301826	0.924	0.811	1.17201e-14	2
	Spag9	8.48632e-19	0.304398	0.895	0.799	1.30969e-14	2
	Vasp	9.76893e-19	0.281975	0.855	0.69	1.50764e-14	2
	Tmem59	1.02153e-18	0.279795	0.944	0.859	1.57653e-14	2
	Dbnl	1.03928e-18	0.271509	0.826	0.615	1.60392e-14	2
	Card11	1.15001e-18	0.275322	0.365	0.163	1.77481e-14	2
	Mbtd1	1.41603e-18	0.33744	0.576	0.337	2.18536e-14	2
	Tmsb4x	1.4411e-18	0.294156	1	1	2.22405e-14	2
	Ybx3	2.18821e-18	0.402362	0.714	0.518	3.37707e-14	2
	Ssr4	2.67988e-18	0.252841	0.987	0.931	4.13586e-14	2
	Tuba1a	6.03514e-18	0.355189	0.72	0.54	9.31403e-14	2
	Grb2	7.63819e-18	0.299806	0.98	0.93	1.1788e-13	2
	Herpud1	8.1253e-18	0.408663	0.753	0.593	1.25398e-13	2
	Cd40	8.13015e-18	0.274691	0.322	0.139	1.25473e-13	2
	Asah1	8.32323e-18	0.284014	0.816	0.6	1.28452e-13	2
	Lrrc8c	1.16157e-17	0.255306	0.533	0.303	1.79265e-13	2
	Atp6ap2	1.53733e-17	0.323698	0.878	0.751	2.37256e-13	2
	Fgd2	1.63833e-17	0.272819	0.47	0.242	2.52843e-13	2
	Ubl3	2.92705e-17	0.261691	0.888	0.751	4.51732e-13	2
	Hsd17b10	6.82541e-17	0.303824	0.615	0.389	1.05337e-12	2
	Mkrn1	8.2858e-17	0.35758	0.855	0.738	1.27875e-12	2
	Il1b	8.64369e-17	0.316399	0.839	0.682	1.33398e-12	2
	Shisa5	1.0196e-16	0.266196	0.977	0.853	1.57354e-12	2
	Cd53	1.05329e-16	0.256558	0.97	0.817	1.62554e-12	2
	Il2rg	1.05492e-16	0.294852	0.773	0.63	1.62806e-12	2
	Pim3	1.07849e-16	0.352502	0.507	0.303	1.66443e-12	2
	Tagln2	1.25882e-16	0.369509	0.967	0.926	1.94274e-12	2
	Nrros	1.4826e-16	0.26406	0.829	0.629	2.2881e-12	2
	Elmo1	1.98558e-16	0.2645	0.586	0.356	3.06434e-12	2
	Map4k4	3.61801e-16	0.314975	0.859	0.726	5.58368e-12	2
	Fam110a	4.71476e-16	0.257521	0.349	0.165	7.27628e-12	2
	Dusp3	6.26827e-16	0.312619	0.572	0.338	9.67382e-12	2
	Gpr132	7.30185e-16	0.341474	0.783	0.625	1.12689e-11	2
	Nfkbid	1.02703e-15	0.266165	0.549	0.319	1.58502e-11	2
	Pde4b	1.77445e-15	0.307776	0.734	0.529	2.7385e-11	2
	Twf2	1.85301e-15	0.288544	0.76	0.596	2.85975e-11	2
	Cotl1	1.87146e-15	0.286888	0.961	0.896	2.88823e-11	2
	Fcho2	2.38722e-15	0.282313	0.638	0.415	3.6842e-11	2
	Hk2	2.50677e-15	0.295491	0.523	0.301	3.86871e-11	2
	Ifngr1	2.61318e-15	0.340947	0.954	0.927	4.03292e-11	2
	Cnn2	2.68487e-15	0.269905	0.806	0.616	4.14355e-11	2
	Atf3	3.25491e-15	0.399119	0.885	0.765	5.0233e-11	2
	Clec4b1	4.00226e-15	0.36923	0.339	0.158	6.17669e-11	2
	Tap1	4.0392e-15	0.296971	0.783	0.63	6.2337e-11	2
	Tpm4	4.72614e-15	0.279856	0.908	0.796	7.29386e-11	2
	Dapk1	4.73045e-15	0.253969	0.391	0.201	7.30051e-11	2
	Skil	5.7089e-15	0.290672	0.852	0.705	8.81054e-11	2
	Kdm6b	6.91917e-15	0.353917	0.868	0.795	1.06784e-10	2
	Mpc1	8.79292e-15	0.328286	0.885	0.835	1.35701e-10	2
	Arl8b	1.96941e-14	0.315281	0.549	0.345	3.03939e-10	2
	Nipa2	2.65619e-14	0.272782	0.668	0.47	4.0993e-10	2
	Zfp106	3.32563e-14	0.275902	0.812	0.696	5.13245e-10	2
	Ifi35	3.58465e-14	0.277174	0.625	0.434	5.53219e-10	2
	Calr	5.06253e-14	0.303997	0.964	0.943	7.813e-10	2
	Cldnd1	5.0827e-14	0.309934	0.516	0.315	7.84414e-10	2
	Sbno2	6.41484e-14	0.278774	0.704	0.477	9.90002e-10	2
	Fosl2	8.47095e-14	0.258887	0.688	0.478	1.30732e-09	2
	Gtpbp4	1.00902e-13	0.253911	0.648	0.466	1.55722e-09	2
	Cyld	2.01578e-13	0.302219	0.549	0.355	3.11096e-09	2
	Rap2a	2.04703e-13	0.325771	0.461	0.276	3.15918e-09	2
	Myadm	2.11723e-13	0.273238	0.753	0.543	3.26752e-09	2
	Ltb4r1	2.46406e-13	0.26793	0.451	0.249	3.80278e-09	2
	Ahr	3.05234e-13	0.304986	0.431	0.25	4.71068e-09	2
	Cxcl16	3.43818e-13	0.318169	0.612	0.401	5.30615e-09	2
	Neurl3	4.49305e-13	0.278679	0.822	0.661	6.93412e-09	2
	Eif4g3	5.7066e-13	0.25305	0.697	0.493	8.80699e-09	2
	Ccdc12	6.16008e-13	0.264622	0.921	0.892	9.50685e-09	2
	Jarid2	9.68352e-13	0.25439	0.628	0.427	1.49446e-08	2
	Pnp	1.9191e-12	0.283192	0.855	0.737	2.96175e-08	2
	Il4ra	2.36711e-12	0.272922	0.592	0.401	3.65315e-08	2
	S100a10	2.46945e-12	0.308154	0.957	0.91	3.81111e-08	2
	Crtc3	3.26271e-12	0.274348	0.533	0.348	5.03534e-08	2
	Crip1	3.49586e-12	0.37391	0.993	0.993	5.39516e-08	2
	Ppp1r11	4.01944e-12	0.250802	0.842	0.781	6.2032e-08	2
	Rala	4.05211e-12	0.255661	0.773	0.684	6.25362e-08	2
	Slk	1.34069e-11	0.272907	0.796	0.686	2.06909e-07	2
[truncated: 5,294 more rows]

## Sheet: Supp. Table 10
	Supplementary Table 10. Antibodies used in this study.
	Antibody	Vendor	Dilution	Cat#
	Goat Anti-Rabbit IRDye800CW	LICOR	1:20000	926-32211
	Donkey Anti-Goat IRDye800CW	LICOR	1:20000	926-32214
	Goat Anti-Rat IRDye800CW	LICOR	1:20000	926-32219
	Goat Anti-Mouse IRDye800CW	LICOR	1:20000	926-32210
	Goat Anti-Mouse IRDye680RD	LICOR	1:20000	926-68070
	Goat Anti-Rabbit IRDye680rd	LICOR	1:20000	926-68071
	Rabbit Anti-beta ACTIN	Abcam	1:2000	ab8227
	Rabbit Anti-human PLIN2	Novus Biologicals	1:1000	NBP-2-37300
	Rabbit Anti-mouse PLIN2	Novus Biologicals	1:1000	NB110-40877
	Rabbit Anti-APOAI	Novus Biologicals	1:2000	NBP2-15429
	Rabbit Anti-IKK-Beta	Cell Signaling Technologies	1:1000	8943
	Mouse Anti-IkB-alpha	Cell Signaling Technologies	1:1000	4814
	Rabbit Anti-IL1B	R&D Systems	1:1000	AF-401-NA
	Goat Anti-APOB	Santa Cruz Biotechnology	1:2000	sc-11795
	Rat Anti-Mouse/Human Mac-2 (Galectin-3)	Cedarlane	1:10000	CL8942AP
	Goat Anti-Rat AF488	LifeTechnologies	1:200	A11008
	Rat Anti-mouse CD16/32 (blocking)	Biolegend		101301
	Pacific Blue Rat Ant-mouse CD45	Biolegend		103125
	FITC Rat Anti-mouse TER-119/RBC	BD Biosciences		550565
	PerCP-Cy5.5 Rat Anti-mouse CD3	BD Pharmingen		560527
	Rat Anti-F4/80	Novus Biologicals	1:900	NB600-404
	Rabbit Anti-Rat (Biotinylated)	Vector Laboratories	1:750	BA-4001
